# Supplementary material
Source: publisher figshare collection journal article supplement (https://acs.figshare.com/ndownloader/files/4547905)
Supplement: Supplementary file 1 [file 4547905]

  
data_1 
  
_audit_creation_method            SHELXL-97 
_chemical_name_systematic 
; 
 ? 
; 
_chemical_name_common             ? 
_chemical_melting_point           ? 
_chemical_formula_moiety          ? 
_chemical_formula_sum 
 'C26 H38 Cl2 Fe2 Hg O16 P2 Se2' 
_chemical_formula_weight          1209.61 
  
loop_ 
 _atom_type_symbol 
 _atom_type_description 
 _atom_type_scat_dispersion_real 
 _atom_type_scat_dispersion_imag 
 _atom_type_scat_source 
 'C'  'C'   0.0033   0.0016 
 'International Tables Vol C Tables 4.2.6.8 and 6.1.1.4' 
 'H'  'H'   0.0000   0.0000 
 'International Tables Vol C Tables 4.2.6.8 and 6.1.1.4' 
 'O'  'O'   0.0106   0.0060 
 'International Tables Vol C Tables 4.2.6.8 and 6.1.1.4' 
 'P'  'P'   0.1023   0.0942 
 'International Tables Vol C Tables 4.2.6.8 and 6.1.1.4' 
 'Fe'  'Fe'   0.3463   0.8444 
 'International Tables Vol C Tables 4.2.6.8 and 6.1.1.4' 
 'Se'  'Se'  -0.0929   2.2259 
 'International Tables Vol C Tables 4.2.6.8 and 6.1.1.4' 
 'Hg'  'Hg'  -2.3894   9.2266 
 'International Tables Vol C Tables 4.2.6.8 and 6.1.1.4' 
 'Cl'  'Cl'   0.1484   0.1585 
 'International Tables Vol C Tables 4.2.6.8 and 6.1.1.4' 
  
_symmetry_cell_setting            Monoclinic 
_symmetry_space_group_name_H-M    P2(1)/c 
  
loop_ 
 _symmetry_equiv_pos_as_xyz 
 'x, y, z' 
 '-x, y+1/2, -z+1/2' 
 '-x, -y, -z' 
 'x, -y-1/2, z-1/2' 
  
_cell_length_a                    10.800(2) 
_cell_length_b                    11.8528(18) 
_cell_length_c                    31.653(6) 
_cell_angle_alpha                 90.00 
_cell_angle_beta                  91.226(15) 
_cell_angle_gamma                 90.00 
_cell_volume                      4050.8(12) 
_cell_formula_units_Z             4 
_cell_measurement_temperature     293(2) 
_cell_measurement_reflns_used     34 
_cell_measurement_theta_min       3.22 
_cell_measurement_theta_max       12.52 
  
_exptl_crystal_description        collumn 
_exptl_crystal_colour             yellow 
_exptl_crystal_size_max           0.3 
_exptl_crystal_size_mid           0.2 
_exptl_crystal_size_min           0.2 
_exptl_crystal_density_meas       ? 
_exptl_crystal_density_diffrn     1.983 
_exptl_crystal_density_method     'not measured' 
_exptl_crystal_F_000              2344 
_exptl_absorpt_coefficient_mu     6.559 
_exptl_absorpt_correction_type    empirical 
_exptl_absorpt_correction_T_min   0.6754 
_exptl_absorpt_correction_T_max   0.9417 
_exptl_absorpt_process_details    ? 
  
_exptl_special_details 
; 
 ? 
; 
  
_diffrn_ambient_temperature       293(2) 
_diffrn_radiation_wavelength      0.71073 
_diffrn_radiation_type            MoK\a 
_diffrn_radiation_source          'fine-focus sealed tube' 
_diffrn_radiation_monochromator   graphite 
_diffrn_measurement_device_type   'Bruker P4' 
_diffrn_measurement_method        '\w scans' 
_diffrn_detector_area_resol_mean  ? 
_diffrn_standards_number          3 
_diffrn_standards_interval_count  497 
_diffrn_standards_interval_time   ? 
_diffrn_standards_decay_%         ? 
_diffrn_reflns_number             6934 
_diffrn_reflns_av_R_equivalents   0.0654 
_diffrn_reflns_av_sigmaI/netI     0.0652 
_diffrn_reflns_limit_h_min        -1 
_diffrn_reflns_limit_h_max        11 
_diffrn_reflns_limit_k_min        -12 
_diffrn_reflns_limit_k_max        1 
_diffrn_reflns_limit_l_min        -34 
_diffrn_reflns_limit_l_max        34 
_diffrn_reflns_theta_min          1.83 
_diffrn_reflns_theta_max          22.50 
_reflns_number_total              5252 
_reflns_number_gt                 3906 
_reflns_threshold_expression      >2sigma(I) 
  
_computing_data_collection        'Bruker XSCANS' 
_computing_cell_refinement        'Bruker XSCANS' 
_computing_data_reduction         'Bruker SHELXTL' 
_computing_structure_solution     'SHELXS-97 (Sheldrick, 1990)' 
_computing_structure_refinement   'SHELXL-97 (Sheldrick, 1997)' 
_computing_molecular_graphics     'Bruker SHELXTL' 
_computing_publication_material   'Bruker SHELXTL' 
  
_refine_special_details 
; 
 Refinement of F^2^ against ALL reflections.  The weighted R-factor wR and 
 goodness of fit S are based on F^2^, conventional R-factors R are based 
 on F, with F set to zero for negative F^2^. The threshold expression of 
 F^2^ > 2sigma(F^2^) is used only for calculating R-factors(gt) etc. and is 
 not relevant to the choice of reflections for refinement.  R-factors based 
 on F^2^ are statistically about twice as large as those based on F, and R- 
 factors based on ALL data will be even larger. 
; 
  
_refine_ls_structure_factor_coef  Fsqd 
_refine_ls_matrix_type            full 
_refine_ls_weighting_scheme       calc 
_refine_ls_weighting_details 
 'calc w=1/[\s^2^(Fo^2^)+(0.0325P)^2^+96.8628P] where P=(Fo^2^+2Fc^2^)/3' 
_atom_sites_solution_primary      direct 
_atom_sites_solution_secondary    difmap 
_atom_sites_solution_hydrogens    geom 
_refine_ls_hydrogen_treatment     constr 
_refine_ls_extinction_method      none 
_refine_ls_extinction_coef        ? 
_refine_ls_number_reflns          5252 
_refine_ls_number_parameters      460 
_refine_ls_number_restraints      0 
_refine_ls_R_factor_all           0.0936 
_refine_ls_R_factor_gt            0.0612 
_refine_ls_wR_factor_ref          0.1606 
_refine_ls_wR_factor_gt           0.1335 
_refine_ls_goodness_of_fit_ref    1.083 
_refine_ls_restrained_S_all       1.083 
_refine_ls_shift/su_max           0.003 
_refine_ls_shift/su_mean          0.000 
  
loop_ 
 _atom_site_label 
 _atom_site_type_symbol 
 _atom_site_fract_x 
 _atom_site_fract_y 
 _atom_site_fract_z 
 _atom_site_U_iso_or_equiv 
 _atom_site_adp_type 
 _atom_site_occupancy 
 _atom_site_symmetry_multiplicity 
 _atom_site_calc_flag 
 _atom_site_refinement_flags 
 _atom_site_disorder_assembly 
 _atom_site_disorder_group 
Hg1 Hg 0.52377(6) 0.97182(6) 0.868029(19) 0.0495(2) Uani 1 1 d . . . 
Fe1 Fe 0.78431(19) 0.76970(19) 0.99314(7) 0.0431(6) Uani 1 1 d . . . 
Fe2 Fe 0.7673(2) 1.2185(2) 0.75307(7) 0.0449(6) Uani 1 1 d . . . 
P1 P 0.6354(3) 0.7908(3) 0.94601(12) 0.0382(9) Uani 1 1 d . . . 
P2 P 0.6294(3) 1.1719(3) 0.79909(12) 0.0385(9) Uani 1 1 d . . . 
Se1 Se 0.54474(17) 0.95958(15) 0.94536(5) 0.0569(5) Uani 1 1 d . . . 
Se2 Se 0.55211(17) 0.99827(14) 0.79177(5) 0.0526(5) Uani 1 1 d . . . 
O1 O 0.5365(9) 0.6999(9) 0.9558(3) 0.055(3) Uani 1 1 d . . . 
O2 O 0.6654(10) 0.7794(10) 0.8978(3) 0.054(3) Uani 1 1 d . . . 
O3 O 0.6647(10) 1.1693(9) 0.8483(3) 0.053(3) Uani 1 1 d . . . 
O4 O 0.5209(9) 1.2587(9) 0.7934(3) 0.050(3) Uani 1 1 d . . . 
O5 O 0.6070(14) 0.7695(14) 1.0617(5) 0.091(5) Uani 1 1 d . . . 
O6 O 0.7813(15) 0.5259(13) 0.9850(5) 0.097(5) Uani 1 1 d . . . 
O7 O 0.7416(15) 1.4565(13) 0.7714(4) 0.088(4) Uani 1 1 d . . . 
O8 O 0.5775(14) 1.2134(15) 0.6860(4) 0.099(5) Uani 1 1 d . . . 
O11 O 0.909(2) 1.067(2) 0.6156(7) 0.198(13) Uani 1 1 d . . . 
O12 O 1.009(2) 0.9329(18) 0.6514(6) 0.153(8) Uani 1 1 d . . . 
O13 O 0.8722(18) 0.887(2) 0.5968(7) 0.163(9) Uani 1 1 d . . . 
O14 O 1.0597(18) 0.961(2) 0.5841(7) 0.171(9) Uani 1 1 d . . . 
O15 O 0.107(2) 0.981(2) 0.8298(9) 0.215(13) Uani 1 1 d . . . 
O16 O 0.111(2) 0.929(2) 0.8978(7) 0.201(12) Uani 1 1 d . . . 
O17 O 0.252(2) 1.0558(17) 0.8770(6) 0.149(8) Uani 1 1 d . . . 
O18 O 0.2685(17) 0.8793(18) 0.8552(7) 0.152(8) Uani 1 1 d . . . 
Cl1 Cl 0.9593(5) 0.9648(5) 0.61267(18) 0.0767(14) Uani 1 1 d . . . 
Cl2 Cl 0.1805(4) 0.9614(4) 0.86474(14) 0.0658(12) Uani 1 1 d . . . 
C1 C 0.4114(16) 0.6893(19) 0.9357(6) 0.077(6) Uani 1 1 d . . . 
H1A H 0.4055 0.7331 0.9095 0.092 Uiso 1 1 calc R . . 
C2 C 0.3174(18) 0.727(2) 0.9663(9) 0.116(9) Uani 1 1 d . . . 
H2A H 0.3256 0.8068 0.9709 0.174 Uiso 1 1 calc R . . 
H2B H 0.3299 0.6879 0.9926 0.174 Uiso 1 1 calc R . . 
H2C H 0.2359 0.7109 0.9552 0.174 Uiso 1 1 calc R . . 
C3 C 0.395(2) 0.567(2) 0.9273(9) 0.146(13) Uani 1 1 d . . . 
H3A H 0.4544 0.5425 0.9070 0.219 Uiso 1 1 calc R . . 
H3B H 0.3129 0.5530 0.9163 0.219 Uiso 1 1 calc R . . 
H3C H 0.4076 0.5251 0.9531 0.219 Uiso 1 1 calc R . . 
C4 C 0.7578(17) 0.7031(16) 0.8793(6) 0.067(5) Uani 1 1 d . . . 
H4A H 0.8180 0.6803 0.9013 0.080 Uiso 1 1 calc R . . 
C5 C 0.823(2) 0.766(3) 0.8457(8) 0.145(13) Uani 1 1 d . . . 
H5A H 0.8635 0.8308 0.8579 0.217 Uiso 1 1 calc R . . 
H5B H 0.7635 0.7908 0.8246 0.217 Uiso 1 1 calc R . . 
H5C H 0.8828 0.7181 0.8330 0.217 Uiso 1 1 calc R . . 
C6 C 0.695(2) 0.603(2) 0.8623(9) 0.139(12) Uani 1 1 d . . . 
H6A H 0.6556 0.5630 0.8848 0.209 Uiso 1 1 calc R . . 
H6B H 0.7544 0.5540 0.8494 0.209 Uiso 1 1 calc R . . 
H6C H 0.6335 0.6249 0.8416 0.209 Uiso 1 1 calc R . . 
C7 C 0.7505(15) 1.2430(15) 0.8704(5) 0.055(4) Uani 1 1 d . . . 
H7A H 0.7867 1.2974 0.8509 0.066 Uiso 1 1 calc R . . 
C8 C 0.682(2) 1.301(2) 0.9033(7) 0.115(9) Uani 1 1 d . . . 
H8A H 0.6194 1.3484 0.8904 0.172 Uiso 1 1 calc R . . 
H8B H 0.7377 1.3469 0.9200 0.172 Uiso 1 1 calc R . . 
H8C H 0.6431 1.2467 0.9212 0.172 Uiso 1 1 calc R . . 
C9 C 0.850(2) 1.170(2) 0.8904(7) 0.103(8) Uani 1 1 d . . . 
H9A H 0.8954 1.1331 0.8687 0.155 Uiso 1 1 calc R . . 
H9B H 0.8122 1.1143 0.9081 0.155 Uiso 1 1 calc R . . 
H9C H 0.9049 1.2161 0.9072 0.155 Uiso 1 1 calc R . . 
C10 C 0.3999(15) 1.2597(17) 0.8147(6) 0.067(5) Uani 1 1 d . . . 
H10A H 0.4008 1.2030 0.8372 0.080 Uiso 1 1 calc R . . 
C11 C 0.3013(16) 1.229(2) 0.7818(8) 0.102(8) Uani 1 1 d . . . 
H11A H 0.3167 1.1543 0.7713 0.153 Uiso 1 1 calc R . . 
H11B H 0.3036 1.2818 0.7588 0.153 Uiso 1 1 calc R . . 
H11C H 0.2212 1.2312 0.7943 0.153 Uiso 1 1 calc R . . 
C12 C 0.383(2) 1.375(2) 0.8337(7) 0.109(9) Uani 1 1 d . . . 
H12B H 0.4467 1.3883 0.8547 0.163 Uiso 1 1 calc R . . 
H12C H 0.3033 1.3789 0.8467 0.163 Uiso 1 1 calc R . . 
H12D H 0.3875 1.4311 0.8120 0.163 Uiso 1 1 calc R . . 
C29 C 0.8602(19) 1.0746(19) 0.7356(8) 0.084(7) Uani 1 1 d . . . 
H29A H 0.8235 1.0039 0.7253 0.101 Uiso 1 1 calc R . . 
C20 C 0.9101(18) 0.8532(19) 1.0334(7) 0.076(6) Uani 1 1 d . . . 
H20A H 0.9046 0.8614 1.0641 0.091 Uiso 1 1 calc R . . 
C21 C 0.8608(17) 0.9272(18) 1.0023(9) 0.086(7) Uani 1 1 d . . . 
H21A H 0.8146 0.9966 1.0079 0.103 Uiso 1 1 calc R . . 
C22 C 0.8958(18) 0.889(2) 0.9622(6) 0.075(7) Uani 1 1 d . . . 
H22A H 0.8768 0.9252 0.9351 0.090 Uiso 1 1 calc R . . 
C23 C 0.9610(18) 0.792(2) 0.9680(6) 0.075(6) Uani 1 1 d . . . 
H23A H 0.9966 0.7462 0.9455 0.090 Uiso 1 1 calc R . . 
C24 C 0.9701(17) 0.768(2) 1.0119(6) 0.076(6) Uani 1 1 d . . . 
H24A H 1.0144 0.7040 1.0248 0.091 Uiso 1 1 calc R . . 
C25 C 0.8956(17) 1.100(2) 0.7764(7) 0.070(6) Uani 1 1 d . . . 
H25A H 0.8827 1.0509 0.8008 0.084 Uiso 1 1 calc R . . 
C26 C 0.9452(16) 1.205(2) 0.7784(7) 0.079(6) Uani 1 1 d . . . 
H26A H 0.9766 1.2432 0.8040 0.095 Uiso 1 1 calc R . . 
C27 C 0.9493(18) 1.248(2) 0.7375(8) 0.087(7) Uani 1 1 d . . . 
H27A H 0.9847 1.3206 0.7291 0.104 Uiso 1 1 calc R . . 
C28 C 0.8992(19) 1.167(2) 0.7107(7) 0.085(7) Uani 1 1 d . . . 
H28A H 0.8921 1.1730 0.6798 0.102 Uiso 1 1 calc R . . 
C31 C 0.6739(16) 0.7698(15) 1.0353(6) 0.054(4) Uani 1 1 d . . . 
C32 C 0.7821(16) 0.6204(17) 0.9868(5) 0.056(4) Uani 1 1 d . . . 
C33 C 0.7486(15) 1.3619(17) 0.7640(5) 0.053(4) Uani 1 1 d . . . 
C34 C 0.6497(16) 1.2169(16) 0.7134(5) 0.058(5) Uani 1 1 d . . . 
  
loop_ 
 _atom_site_aniso_label 
 _atom_site_aniso_U_11 
 _atom_site_aniso_U_22 
 _atom_site_aniso_U_33 
 _atom_site_aniso_U_23 
 _atom_site_aniso_U_13 
 _atom_site_aniso_U_12 
Hg1 0.0572(4) 0.0497(4) 0.0414(4) 0.0067(3) -0.0049(3) -0.0022(3) 
Fe1 0.0384(13) 0.0537(14) 0.0370(12) 0.0065(11) -0.0079(10) -0.0057(11) 
Fe2 0.0385(13) 0.0559(14) 0.0401(13) 0.0022(11) -0.0005(10) -0.0037(11) 
P1 0.038(2) 0.043(2) 0.034(2) -0.0014(18) -0.0032(17) -0.0030(18) 
P2 0.036(2) 0.049(2) 0.030(2) 0.0025(18) -0.0060(17) -0.0035(18) 
Se1 0.0759(12) 0.0562(11) 0.0386(9) -0.0001(8) -0.0003(8) 0.0153(9) 
Se2 0.0676(11) 0.0528(10) 0.0373(9) -0.0013(7) -0.0063(8) -0.0132(8) 
O1 0.045(7) 0.066(7) 0.052(7) 0.000(6) -0.012(5) -0.014(6) 
O2 0.064(7) 0.072(8) 0.025(5) -0.004(5) 0.000(5) 0.013(6) 
O3 0.058(7) 0.065(7) 0.035(6) 0.005(5) -0.012(5) -0.021(6) 
O4 0.035(6) 0.058(7) 0.060(7) 0.018(6) 0.012(5) 0.007(5) 
O5 0.080(10) 0.127(13) 0.067(9) 0.010(9) 0.013(8) 0.003(9) 
O6 0.129(14) 0.063(10) 0.100(12) -0.004(9) 0.034(10) 0.006(10) 
O7 0.119(13) 0.072(10) 0.073(10) -0.007(8) -0.010(8) -0.001(9) 
O8 0.084(10) 0.144(15) 0.067(9) 0.015(10) -0.020(8) -0.028(10) 
O11 0.26(3) 0.18(2) 0.154(18) -0.096(16) -0.106(18) 0.14(2) 
O12 0.21(2) 0.145(17) 0.105(14) -0.002(13) -0.039(14) 0.079(16) 
O13 0.119(16) 0.18(2) 0.19(2) -0.065(18) 0.001(14) -0.051(15) 
O14 0.107(15) 0.23(3) 0.18(2) -0.010(19) 0.050(14) -0.014(16) 
O15 0.17(2) 0.26(3) 0.21(3) 0.01(2) -0.10(2) 0.06(2) 
O16 0.22(2) 0.26(3) 0.136(18) -0.013(19) 0.110(18) -0.08(2) 
O17 0.177(19) 0.128(16) 0.144(17) -0.031(13) 0.035(14) -0.067(15) 
O18 0.111(14) 0.148(17) 0.20(2) -0.071(16) -0.021(14) 0.038(13) 
Cl1 0.060(3) 0.082(4) 0.088(4) -0.019(3) -0.004(3) 0.009(3) 
Cl2 0.066(3) 0.076(3) 0.056(3) -0.010(3) 0.006(2) 0.002(3) 
C1 0.047(11) 0.115(18) 0.068(13) 0.013(13) -0.008(10) -0.024(12) 
C2 0.047(13) 0.14(2) 0.17(3) 0.01(2) 0.021(15) -0.010(14) 
C3 0.11(2) 0.17(3) 0.17(3) -0.12(2) 0.033(19) -0.06(2) 
C4 0.067(12) 0.075(13) 0.058(12) -0.012(10) -0.001(9) 0.029(11) 
C5 0.12(2) 0.22(3) 0.100(19) 0.06(2) 0.076(17) 0.06(2) 
C6 0.12(2) 0.14(3) 0.16(3) -0.09(2) -0.029(19) 0.056(19) 
C7 0.045(10) 0.065(11) 0.055(11) -0.002(9) -0.010(8) -0.008(9) 
C8 0.111(19) 0.13(2) 0.106(19) -0.060(17) 0.047(15) -0.039(17) 
C9 0.098(17) 0.118(19) 0.091(16) 0.008(15) -0.070(14) 0.003(15) 
C10 0.047(11) 0.090(15) 0.064(12) 0.032(11) 0.015(9) 0.002(10) 
C11 0.035(11) 0.13(2) 0.14(2) -0.007(17) -0.030(12) 0.000(12) 
C12 0.087(17) 0.15(2) 0.087(16) -0.051(17) -0.018(13) 0.050(16) 
C29 0.073(15) 0.064(13) 0.12(2) -0.003(14) 0.018(14) 0.010(11) 
C20 0.064(13) 0.096(16) 0.067(13) -0.019(13) -0.024(11) -0.022(12) 
C21 0.041(11) 0.065(13) 0.15(2) 0.018(15) -0.008(14) -0.029(10) 
C22 0.047(12) 0.118(19) 0.060(13) 0.015(13) 0.014(10) -0.050(13) 
C23 0.062(13) 0.112(18) 0.050(12) 0.005(12) 0.000(9) 0.008(13) 
C24 0.051(12) 0.111(18) 0.065(14) 0.006(13) -0.021(10) -0.014(12) 
C25 0.043(11) 0.103(18) 0.064(14) 0.006(12) 0.003(9) 0.025(12) 
C26 0.031(10) 0.12(2) 0.090(17) -0.012(15) -0.004(10) -0.009(11) 
C27 0.059(13) 0.101(17) 0.102(18) -0.022(16) 0.037(12) 0.001(12) 
C28 0.073(14) 0.116(19) 0.066(13) -0.034(15) 0.019(11) 0.031(14) 
C31 0.050(11) 0.068(12) 0.045(10) 0.006(9) 0.004(9) -0.006(9) 
C32 0.053(11) 0.062(12) 0.052(11) -0.001(10) 0.005(8) 0.007(10) 
C33 0.049(10) 0.063(12) 0.048(10) 0.001(10) 0.008(8) -0.004(9) 
C34 0.056(11) 0.076(13) 0.041(10) -0.002(9) -0.003(9) -0.009(10) 
  
_geom_special_details 
; 
 All esds (except the esd in the dihedral angle between two l.s. planes) 
 are estimated using the full covariance matrix.  The cell esds are taken 
 into account individually in the estimation of esds in distances, angles 
 and torsion angles; correlations between esds in cell parameters are only 
 used when they are defined by crystal symmetry.  An approximate (isotropic) 
 treatment of cell esds is used for estimating esds involving l.s. planes. 
; 
  
loop_ 
 _geom_bond_atom_site_label_1 
 _geom_bond_atom_site_label_2 
 _geom_bond_distance 
 _geom_bond_site_symmetry_2 
 _geom_bond_publ_flag 
Hg1 Se1 2.4577(17) . ? 
Hg1 Se2 2.4598(18) . ? 
Fe1 C32 1.78(2) . ? 
Fe1 C31 1.809(18) . ? 
Fe1 C21 2.060(19) . ? 
Fe1 C24 2.080(18) . ? 
Fe1 C20 2.092(17) . ? 
Fe1 C23 2.10(2) . ? 
Fe1 C22 2.108(17) . ? 
Fe1 P1 2.184(4) . ? 
Fe2 C33 1.75(2) . ? 
Fe2 C34 1.768(18) . ? 
Fe2 C29 2.06(2) . ? 
Fe2 C27 2.067(19) . ? 
Fe2 C28 2.068(18) . ? 
Fe2 C26 2.072(18) . ? 
Fe2 C25 2.096(18) . ? 
Fe2 P2 2.177(4) . ? 
P1 O1 1.553(11) . ? 
P1 O2 1.573(10) . ? 
P1 Se1 2.228(4) . ? 
P2 O4 1.567(10) . ? 
P2 O3 1.595(10) . ? 
P2 Se2 2.231(4) . ? 
O1 C1 1.49(2) . ? 
O2 C4 1.477(19) . ? 
O3 C7 1.445(18) . ? 
O4 C10 1.483(19) . ? 
O5 C31 1.116(19) . ? 
O6 C32 1.12(2) . ? 
O7 C33 1.15(2) . ? 
O8 C34 1.153(19) . ? 
O11 Cl1 1.331(19) . ? 
O12 Cl1 1.381(18) . ? 
O13 Cl1 1.404(18) . ? 
O14 Cl1 1.428(19) . ? 
O15 Cl2 1.37(2) . ? 
O16 Cl2 1.356(18) . ? 
O17 Cl2 1.409(18) . ? 
O18 Cl2 1.397(18) . ? 
C1 C2 1.49(3) . ? 
C1 C3 1.49(3) . ? 
C4 C6 1.47(3) . ? 
C4 C5 1.49(3) . ? 
C7 C8 1.46(3) . ? 
C7 C9 1.51(2) . ? 
C10 C12 1.51(3) . ? 
C10 C11 1.52(3) . ? 
C29 C25 1.37(3) . ? 
C29 C28 1.42(3) . ? 
C20 C24 1.39(3) . ? 
C20 C21 1.41(3) . ? 
C21 C22 1.41(3) . ? 
C22 C23 1.36(3) . ? 
C23 C24 1.42(3) . ? 
C25 C26 1.36(3) . ? 
C26 C27 1.39(3) . ? 
C27 C28 1.38(3) . ? 
  
loop_ 
 _geom_angle_atom_site_label_1 
 _geom_angle_atom_site_label_2 
 _geom_angle_atom_site_label_3 
 _geom_angle 
 _geom_angle_site_symmetry_1 
 _geom_angle_site_symmetry_3 
 _geom_angle_publ_flag 
Se1 Hg1 Se2 166.95(7) . . ? 
C32 Fe1 C31 94.4(8) . . ? 
C32 Fe1 C21 157.0(8) . . ? 
C31 Fe1 C21 99.4(9) . . ? 
C32 Fe1 C24 91.8(9) . . ? 
C31 Fe1 C24 115.9(8) . . ? 
C21 Fe1 C24 65.7(9) . . ? 
C32 Fe1 C20 123.1(9) . . ? 
C31 Fe1 C20 88.9(8) . . ? 
C21 Fe1 C20 39.8(8) . . ? 
C24 Fe1 C20 38.9(8) . . ? 
C32 Fe1 C23 95.3(9) . . ? 
C31 Fe1 C23 153.9(8) . . ? 
C21 Fe1 C23 64.8(9) . . ? 
C24 Fe1 C23 39.7(7) . . ? 
C20 Fe1 C23 65.6(8) . . ? 
C32 Fe1 C22 128.2(9) . . ? 
C31 Fe1 C22 137.2(9) . . ? 
C21 Fe1 C22 39.5(8) . . ? 
C24 Fe1 C22 65.3(8) . . ? 
C20 Fe1 C22 66.2(8) . . ? 
C23 Fe1 C22 37.6(8) . . ? 
C32 Fe1 P1 91.6(6) . . ? 
C31 Fe1 P1 90.9(5) . . ? 
C21 Fe1 P1 106.3(7) . . ? 
C24 Fe1 P1 152.5(6) . . ? 
C20 Fe1 P1 145.2(7) . . ? 
C23 Fe1 P1 112.9(5) . . ? 
C22 Fe1 P1 91.5(6) . . ? 
C33 Fe2 C34 93.9(8) . . ? 
C33 Fe2 C29 156.5(9) . . ? 
C34 Fe2 C29 98.4(9) . . ? 
C33 Fe2 C27 89.8(9) . . ? 
C34 Fe2 C27 120.3(9) . . ? 
C29 Fe2 C27 66.7(9) . . ? 
C33 Fe2 C28 119.8(10) . . ? 
C34 Fe2 C28 91.7(8) . . ? 
C29 Fe2 C28 40.3(8) . . ? 
C27 Fe2 C28 39.0(8) . . ? 
C33 Fe2 C26 96.1(9) . . ? 
C34 Fe2 C26 157.0(9) . . ? 
C29 Fe2 C26 65.7(9) . . ? 
C27 Fe2 C26 39.3(8) . . ? 
C28 Fe2 C26 65.4(8) . . ? 
C33 Fe2 C25 131.3(9) . . ? 
C34 Fe2 C25 134.6(9) . . ? 
C29 Fe2 C25 38.5(8) . . ? 
C27 Fe2 C25 64.7(9) . . ? 
C28 Fe2 C25 64.7(8) . . ? 
C26 Fe2 C25 38.1(8) . . ? 
C33 Fe2 P2 91.7(6) . . ? 
C34 Fe2 P2 88.9(6) . . ? 
C29 Fe2 P2 108.3(7) . . ? 
C27 Fe2 P2 150.6(8) . . ? 
C28 Fe2 P2 148.3(8) . . ? 
C26 Fe2 P2 111.4(7) . . ? 
C25 Fe2 P2 92.9(6) . . ? 
O1 P1 O2 106.9(6) . . ? 
O1 P1 Fe1 106.5(4) . . ? 
O2 P1 Fe1 119.3(4) . . ? 
O1 P1 Se1 108.7(5) . . ? 
O2 P1 Se1 99.7(4) . . ? 
Fe1 P1 Se1 115.22(18) . . ? 
O4 P2 O3 106.7(6) . . ? 
O4 P2 Fe2 106.1(4) . . ? 
O3 P2 Fe2 120.3(4) . . ? 
O4 P2 Se2 108.5(4) . . ? 
O3 P2 Se2 99.5(4) . . ? 
Fe2 P2 Se2 115.10(19) . . ? 
P1 Se1 Hg1 95.35(12) . . ? 
P2 Se2 Hg1 94.00(11) . . ? 
C1 O1 P1 126.6(11) . . ? 
C4 O2 P1 126.3(10) . . ? 
C7 O3 P2 126.9(10) . . ? 
C10 O4 P2 128.1(10) . . ? 
O11 Cl1 O12 109.9(12) . . ? 
O11 Cl1 O13 110.6(16) . . ? 
O12 Cl1 O13 112.6(15) . . ? 
O11 Cl1 O14 112.7(18) . . ? 
O12 Cl1 O14 105.5(14) . . ? 
O13 Cl1 O14 105.5(14) . . ? 
O16 Cl2 O15 110.4(19) . . ? 
O16 Cl2 O18 111.3(17) . . ? 
O15 Cl2 O18 109.1(15) . . ? 
O16 Cl2 O17 108.6(14) . . ? 
O15 Cl2 O17 113.3(17) . . ? 
O18 Cl2 O17 104.0(13) . . ? 
O1 C1 C2 108.8(17) . . ? 
O1 C1 C3 105.2(19) . . ? 
C2 C1 C3 109.4(19) . . ? 
C6 C4 O2 109.3(16) . . ? 
C6 C4 C5 112(2) . . ? 
O2 C4 C5 107.9(17) . . ? 
O3 C7 C8 107.5(15) . . ? 
O3 C7 C9 107.5(15) . . ? 
C8 C7 C9 109.9(18) . . ? 
O4 C10 C12 107.8(16) . . ? 
O4 C10 C11 107.4(16) . . ? 
C12 C10 C11 113.7(17) . . ? 
C25 C29 C28 106(2) . . ? 
C25 C29 Fe2 72.1(12) . . ? 
C28 C29 Fe2 70.2(11) . . ? 
C24 C20 C21 106(2) . . ? 
C24 C20 Fe1 70.1(11) . . ? 
C21 C20 Fe1 68.9(10) . . ? 
C22 C21 C20 109(2) . . ? 
C22 C21 Fe1 72.1(12) . . ? 
C20 C21 Fe1 71.3(11) . . ? 
C23 C22 C21 108(2) . . ? 
C23 C22 Fe1 70.9(12) . . ? 
C21 C22 Fe1 68.4(10) . . ? 
C22 C23 C24 109(2) . . ? 
C22 C23 Fe1 71.6(11) . . ? 
C24 C23 Fe1 69.4(11) . . ? 
C20 C24 C23 108(2) . . ? 
C20 C24 Fe1 71.0(11) . . ? 
C23 C24 Fe1 70.9(11) . . ? 
C26 C25 C29 110(2) . . ? 
C26 C25 Fe2 70.0(12) . . ? 
C29 C25 Fe2 69.3(11) . . ? 
C25 C26 C27 108(2) . . ? 
C25 C26 Fe2 71.9(11) . . ? 
C27 C26 Fe2 70.2(12) . . ? 
C28 C27 C26 107(2) . . ? 
C28 C27 Fe2 70.6(12) . . ? 
C26 C27 Fe2 70.5(11) . . ? 
C27 C28 C29 108(2) . . ? 
C27 C28 Fe2 70.5(11) . . ? 
C29 C28 Fe2 69.6(11) . . ? 
O5 C31 Fe1 179.0(17) . . ? 
O6 C32 Fe1 176.4(18) . . ? 
O7 C33 Fe2 177.1(17) . . ? 
O8 C34 Fe2 176.3(17) . . ? 
  
_diffrn_measured_fraction_theta_max    0.990 
_diffrn_reflns_theta_full              22.50 
_diffrn_measured_fraction_theta_full   0.990 
_refine_diff_density_max    1.434 
_refine_diff_density_min   -2.868 
_refine_diff_density_rms    0.218 
  

#===END


data_2

 

_audit_creation_method            SHELXL-97

_chemical_name_systematic

;

 ?

;

_chemical_name_common             ?

_chemical_melting_point           ?

_chemical_formula_moiety          ?

_chemical_formula_sum

 'C39 H57 Cl2 Fe3 Hg O20 P3 Se3'

_chemical_formula_weight          1614.68

 

loop_

 _atom_type_symbol

 _atom_type_description

 _atom_type_scat_dispersion_real

 _atom_type_scat_dispersion_imag

 _atom_type_scat_source

 'C'  'C'   0.0033   0.0016

 'International Tables Vol C Tables 4.2.6.8 and 6.1.1.4'

 'H'  'H'   0.0000   0.0000

 'International Tables Vol C Tables 4.2.6.8 and 6.1.1.4'

 'O'  'O'   0.0106   0.0060

 'International Tables Vol C Tables 4.2.6.8 and 6.1.1.4'

 'P'  'P'   0.1023   0.0942

 'International Tables Vol C Tables 4.2.6.8 and 6.1.1.4'

 'Fe'  'Fe'   0.3463   0.8444

 'International Tables Vol C Tables 4.2.6.8 and 6.1.1.4'

 'Se'  'Se'  -0.0929   2.2259

 'International Tables Vol C Tables 4.2.6.8 and 6.1.1.4'

 'Hg'  'Hg'  -2.3894   9.2266

 'International Tables Vol C Tables 4.2.6.8 and 6.1.1.4'

 'Cl'  'Cl'   0.1484   0.1585

 'International Tables Vol C Tables 4.2.6.8 and 6.1.1.4'

 

_symmetry_cell_setting            Triclinic

_symmetry_space_group_name_H-M    P-1

 

loop_

 _symmetry_equiv_pos_as_xyz

 'x, y, z'

 '-x, -y, -z'

 

_cell_length_a                    14.7854(14)

_cell_length_b                    15.134(2)

_cell_length_c                    17.578(3)

_cell_angle_alpha                 71.037(13)

_cell_angle_beta                  65.262(11)

_cell_angle_gamma                 60.928(10)

_cell_volume                      3085.4(7)

_cell_formula_units_Z             2

_cell_measurement_temperature     293(2)

_cell_measurement_reflns_used     33

_cell_measurement_theta_min       2.58

_cell_measurement_theta_max       12.51

 

_exptl_crystal_description        plate

_exptl_crystal_colour             yellow

_exptl_crystal_size_max           0.40

_exptl_crystal_size_mid           0.35

_exptl_crystal_size_min           0.10

_exptl_crystal_density_meas       ?

_exptl_crystal_density_diffrn     1.738

_exptl_crystal_density_method     'not measured'

_exptl_crystal_F_000              1580

_exptl_absorpt_coefficient_mu     5.168

_exptl_absorpt_correction_type    empirical

_exptl_absorpt_correction_T_min   0.147

_exptl_absorpt_correction_T_max   0.596

_exptl_absorpt_process_details    ?

 

_exptl_special_details

;

 ?

;

 

_diffrn_ambient_temperature       293(2)

_diffrn_radiation_wavelength      0.71073

_diffrn_radiation_type            MoK\a

_diffrn_radiation_source          'fine-focus sealed tube'

_diffrn_radiation_monochromator   graphite

_diffrn_measurement_device_type   'Bruker P4'

_diffrn_measurement_method        '\w scans'

_diffrn_detector_area_resol_mean  ?

_diffrn_standards_number          3

_diffrn_standards_interval_count  497

_diffrn_standards_interval_time   ?

_diffrn_standards_decay_%         ?

_diffrn_reflns_number             11651

_diffrn_reflns_av_R_equivalents   0.0399

_diffrn_reflns_av_sigmaI/netI     0.0661

_diffrn_reflns_limit_h_min        -16

_diffrn_reflns_limit_h_max        1

_diffrn_reflns_limit_k_min        -17

_diffrn_reflns_limit_k_max        16

_diffrn_reflns_limit_l_min        -20

_diffrn_reflns_limit_l_max        19

_diffrn_reflns_theta_min          1.75

_diffrn_reflns_theta_max          25.00

_reflns_number_total              10299

_reflns_number_gt                 6261

_reflns_threshold_expression      >2sigma(I)

 

_computing_data_collection        'Bruker XSCANS'

_computing_cell_refinement        'Bruker XSCANS'

_computing_data_reduction         'Bruker SHELXTL'

_computing_structure_solution     'SHELXS-97 (Sheldrick, 1990)'

_computing_structure_refinement   'SHELXL-97 (Sheldrick, 1997)'

_computing_molecular_graphics     'Bruker SHELXTL'

_computing_publication_material   'Bruker SHELXTL'

 

_refine_special_details

;

 Refinement of F^2^ against ALL reflections.  The weighted R-factor wR and

 goodness of fit S are based on F^2^, conventional R-factors R are based

 on F, with F set to zero for negative F^2^. The threshold expression of

 F^2^ > 2sigma(F^2^) is used only for calculating R-factors(gt) etc. and is

 not relevant to the choice of reflections for refinement.  R-factors based

 on F^2^ are statistically about twice as large as those based on F, and R-

 factors based on ALL data will be even larger.

;

 

_refine_ls_structure_factor_coef  Fsqd

_refine_ls_matrix_type            full

_refine_ls_weighting_scheme       calc

_refine_ls_weighting_details

 'calc w=1/[\s^2^(Fo^2^)+(0.0870P)^2^+12.7260P] where P=(Fo^2^+2Fc^2^)/3'

_atom_sites_solution_primary      direct

_atom_sites_solution_secondary    difmap

_atom_sites_solution_hydrogens    geom

_refine_ls_hydrogen_treatment     constr

_refine_ls_extinction_method      none

_refine_ls_extinction_coef        ?

_refine_ls_number_reflns          10299

_refine_ls_number_parameters      679

_refine_ls_number_restraints      9

_refine_ls_R_factor_all           0.1260

_refine_ls_R_factor_gt            0.0680

_refine_ls_wR_factor_ref          0.2002

_refine_ls_wR_factor_gt           0.1639

_refine_ls_goodness_of_fit_ref    1.112

_refine_ls_restrained_S_all       1.113

_refine_ls_shift/su_max           0.001

_refine_ls_shift/su_mean          0.000

 

loop_

 _atom_site_label

 _atom_site_type_symbol

 _atom_site_fract_x

 _atom_site_fract_y

 _atom_site_fract_z

 _atom_site_U_iso_or_equiv

 _atom_site_adp_type

 _atom_site_occupancy

 _atom_site_symmetry_multiplicity

 _atom_site_calc_flag

 _atom_site_refinement_flags

 _atom_site_disorder_assembly

 _atom_site_disorder_group

Hg1 Hg 0.44644(4) 0.88166(4) 0.25530(4) 0.0693(2) Uani 1 1 d . . .

Fe1 Fe 0.82918(13) 0.70209(14) 0.16702(12) 0.0676(5) Uani 1 1 d . . .

Fe2 Fe 0.25325(15) 0.73870(15) 0.21819(12) 0.0717(5) Uani 1 1 d . . .

Fe3 Fe 0.51602(14) 1.23111(14) 0.21077(12) 0.0677(5) Uani 1 1 d . . .

Se1 Se 0.54937(12) 0.69367(11) 0.24091(12) 0.0895(5) Uani 1 1 d . . .

Se2 Se 0.24827(10) 0.97409(10) 0.26362(10) 0.0748(4) Uani 1 1 d . . .

Se3 Se 0.53929(11) 0.97041(10) 0.27784(11) 0.0826(5) Uani 1 1 d . . .

P1 P 0.7085(3) 0.6423(3) 0.2588(2) 0.0705(9) Uani 1 1 d . . .

P2 P 0.1835(3) 0.8582(3) 0.2970(2) 0.0637(8) Uani 1 1 d . . .

P3 P 0.4265(2) 1.1328(2) 0.2778(2) 0.0579(8) Uani 1 1 d . . .

O1 O 0.7512(8) 0.5212(6) 0.2718(6) 0.086(3) Uani 1 1 d . . .

O2 O 0.6853(9) 0.6580(8) 0.3505(7) 0.097(3) Uani 1 1 d . . .

O3 O 0.1841(7) 0.8006(7) 0.3899(5) 0.078(2) Uani 1 1 d . . .

O4 O 0.0566(6) 0.9287(8) 0.3127(6) 0.081(3) Uani 1 1 d . . .

O5 O 0.3369(6) 1.1463(5) 0.2429(5) 0.060(2) Uani 1 1 d . . .

O6 O 0.3678(7) 1.1550(7) 0.3728(6) 0.078(2) Uani 1 1 d . . .

O7 O 0.7935(9) 0.8256(10) 0.2801(10) 0.131(5) Uani 1 1 d . . .

O8 O 0.9988(11) 0.5338(11) 0.2313(10) 0.154(6) Uani 1 1 d . . .

O9 O 0.3621(11) 0.5819(10) 0.3374(8) 0.119(4) Uani 1 1 d . . .

O10 O 0.0569(13) 0.7025(15) 0.2955(12) 0.188(8) Uani 1 1 d . . .

O11 O 0.3369(11) 1.4078(9) 0.2818(9) 0.128(4) Uani 1 1 d . . .

O12 O 0.6139(10) 1.1616(12) 0.3429(9) 0.125(4) Uani 1 1 d . . .

O13 O -0.065(3) 1.0967(17) 0.026(3) 0.190(17) Uani 0.50 1 d PD . .

O14 O 0.1056(18) 0.979(4) -0.008(4) 0.25(4) Uani 0.50 1 d PD . .

O15 O 0.046(5) 1.022(4) 0.043(3) 0.189(18) Uani 0.50 1 d PD . .

O16 O -0.031(3) 0.942(3) 0.0800(11) 0.164(13) Uani 0.50 1 d PD . .

O17 O 0.2618(13) 0.4861(11) 0.0955(9) 0.140(5) Uani 1 1 d . . .

O18 O 0.3389(11) 0.4683(16) -0.0425(12) 0.200(8) Uani 1 1 d . . .

O19 O 0.1637(11) 0.4845(9) 0.0219(10) 0.136(5) Uani 1 1 d . . .

O20 O 0.2049(10) 0.6205(10) -0.0049(11) 0.151(6) Uani 1 1 d . . .

O21 O 0.6068(12) -0.008(2) -0.0177(17) 0.146(11) Uani 0.50 1 d PD . .

O22 O 0.484(3) 0.094(2) -0.051(3) 0.152(14) Uani 0.50 1 d PD . .

O23 O 0.447(3) 0.096(2) 0.026(3) 0.20(2) Uani 0.50 1 d PD . .

O24 O 0.4949(18) -0.008(2) 0.0825(8) 0.097(7) Uani 0.50 1 d PD . .

Cl1 Cl 0.0000 1.0000 0.0000 0.113(2) Uani 1 2 d SD . .

Cl2 Cl 0.2445(3) 0.5149(3) 0.0168(3) 0.0892(11) Uani 1 1 d . . .

Cl3 Cl 0.5000 0.0000 0.0000 0.105(2) Uani 1 2 d SD . .

C1 C 0.7660(14) 0.4590(11) 0.2153(12) 0.103(5) Uani 1 1 d . . .

H1A H 0.7431 0.5053 0.1666 0.123 Uiso 1 1 calc R . .

C2 C 0.691(2) 0.4079(15) 0.2628(15) 0.151(9) Uani 1 1 d . . .

H2A H 0.6174 0.4584 0.2799 0.227 Uiso 1 1 calc R . .

H2B H 0.7100 0.3640 0.3121 0.227 Uiso 1 1 calc R . .

H2C H 0.6958 0.3679 0.2273 0.227 Uiso 1 1 calc R . .

C3 C 0.8823(16) 0.3919(14) 0.1837(14) 0.145(8) Uani 1 1 d . . .

H3A H 0.9235 0.4329 0.1532 0.218 Uiso 1 1 calc R . .

H3B H 0.8920 0.3512 0.1467 0.218 Uiso 1 1 calc R . .

H3C H 0.9073 0.3479 0.2307 0.218 Uiso 1 1 calc R . .

C4 C 0.611(3) 0.627(2) 0.4251(14) 0.186(12) Uani 1 1 d . . .

H4A H 0.5605 0.6182 0.4093 0.223 Uiso 1 1 calc R . .

C5 C 0.551(2) 0.702(3) 0.4808(17) 0.219(15) Uani 1 1 d . . .

H5A H 0.5008 0.6810 0.5300 0.329 Uiso 1 1 calc R . .

H5B H 0.5121 0.7667 0.4518 0.329 Uiso 1 1 calc R . .

H5C H 0.6009 0.7095 0.4978 0.329 Uiso 1 1 calc R . .

C6 C 0.679(6) 0.530(3) 0.460(2) 0.53(6) Uani 1 1 d . . .

H6A H 0.7155 0.4829 0.4204 0.791 Uiso 1 1 calc R . .

H6B H 0.6354 0.5040 0.5118 0.791 Uiso 1 1 calc R . .

H6C H 0.7327 0.5376 0.4720 0.791 Uiso 1 1 calc R . .

C7 C 0.1477(14) 0.8501(13) 0.4616(10) 0.097(5) Uani 1 1 d . . .

H7A H 0.1316 0.9230 0.4416 0.116 Uiso 1 1 calc R . .

C8 C 0.0439(18) 0.839(2) 0.5213(13) 0.186(12) Uani 1 1 d . . .

H8A H -0.0107 0.8731 0.4934 0.279 Uiso 1 1 calc R . .

H8B H 0.0188 0.8692 0.5707 0.279 Uiso 1 1 calc R . .

H8C H 0.0575 0.7678 0.5379 0.279 Uiso 1 1 calc R . .

C9 C 0.2387(19) 0.804(2) 0.4981(13) 0.165(10) Uani 1 1 d . . .

H9A H 0.3007 0.8155 0.4563 0.247 Uiso 1 1 calc R . .

H9B H 0.2582 0.7314 0.5148 0.247 Uiso 1 1 calc R . .

H9C H 0.2158 0.8343 0.5467 0.247 Uiso 1 1 calc R . .

C10 C 0.0036(10) 0.9879(13) 0.2478(10) 0.084(4) Uani 1 1 d . . .

H10A H 0.0470 0.9556 0.1965 0.101 Uiso 1 1 calc R . .

C11 C -0.1057(17) 0.988(2) 0.2779(17) 0.191(13) Uani 1 1 d . . .

H11A H -0.0999 0.9194 0.2950 0.286 Uiso 1 1 calc R . .

H11B H -0.1377 1.0213 0.2330 0.286 Uiso 1 1 calc R . .

H11C H -0.1508 1.0251 0.3253 0.286 Uiso 1 1 calc R . .

C12 C -0.008(2) 1.0962(16) 0.226(2) 0.191(13) Uani 1 1 d . . .

H12A H 0.0629 1.0972 0.2041 0.286 Uiso 1 1 calc R . .

H12B H -0.0499 1.1285 0.2758 0.286 Uiso 1 1 calc R . .

H12C H -0.0444 1.1324 0.1838 0.286 Uiso 1 1 calc R . .

C13 C 0.2571(11) 1.2432(10) 0.2144(9) 0.075(4) Uani 1 1 d . . .

H13B H 0.2839 1.2967 0.1980 0.090 Uiso 1 1 calc R . .

C14 C 0.2408(15) 1.2339(12) 0.1416(11) 0.109(6) Uani 1 1 d . . .

H14A H 0.3081 1.2187 0.0957 0.164 Uiso 1 1 calc R . .

H14B H 0.1863 1.2971 0.1244 0.164 Uiso 1 1 calc R . .

H14C H 0.2172 1.1798 0.1568 0.164 Uiso 1 1 calc R . .

C15 C 0.1530(13) 1.2695(15) 0.2878(12) 0.139(8) Uani 1 1 d . . .

H15B H 0.1663 1.2763 0.3342 0.208 Uiso 1 1 calc R . .

H15C H 0.1278 1.2162 0.3053 0.208 Uiso 1 1 calc R . .

H15D H 0.0986 1.3329 0.2708 0.208 Uiso 1 1 calc R . .

C16 C 0.330(2) 1.086(2) 0.4491(12) 0.146(9) Uani 1 1 d . . .

H16A H 0.3841 1.0175 0.4348 0.175 Uiso 1 1 calc R . .

C17 C 0.234(3) 1.084(4) 0.4584(17) 0.33(3) Uani 1 1 d D . .

H17B H 0.2151 1.0388 0.5094 0.500 Uiso 1 1 calc R . .

H17C H 0.2426 1.0596 0.4106 0.500 Uiso 1 1 calc R . .

H17D H 0.1772 1.1515 0.4618 0.500 Uiso 1 1 calc R . .

C18 C 0.353(3) 1.091(3) 0.5168(16) 0.29(2) Uani 1 1 d D . .

H18B H 0.3292 1.0466 0.5662 0.434 Uiso 1 1 calc R . .

H18C H 0.3158 1.1598 0.5283 0.434 Uiso 1 1 calc R . .

H18D H 0.4304 1.0693 0.5023 0.434 Uiso 1 1 calc R . .

C19 C 0.9050(19) 0.6596(13) 0.0469(11) 0.117(7) Uani 1 1 d . . .

H19A H 0.9564 0.5910 0.0327 0.140 Uiso 1 1 calc R . .

C20 C 0.9314(13) 0.7380(16) 0.0465(11) 0.107(5) Uani 1 1 d . . .

H20B H 1.0046 0.7336 0.0332 0.128 Uiso 1 1 calc R . .

C21 C 0.8350(16) 0.8220(13) 0.0666(11) 0.104(5) Uani 1 1 d . . .

H21A H 0.8275 0.8886 0.0703 0.125 Uiso 1 1 calc R . .

C22 C 0.7511(11) 0.7983(14) 0.0776(9) 0.090(5) Uani 1 1 d . . .

H22A H 0.6739 0.8455 0.0904 0.108 Uiso 1 1 calc R . .

C23 C 0.7923(19) 0.7021(16) 0.0642(10) 0.099(5) Uani 1 1 d . . .

H23A H 0.7501 0.6672 0.0662 0.119 Uiso 1 1 calc R . .

C24 C 0.3974(13) 0.6788(16) 0.1218(10) 0.103(5) Uani 1 1 d . . .

H24A H 0.4651 0.6225 0.1299 0.124 Uiso 1 1 calc R . .

C25 C 0.3692(14) 0.7831(14) 0.1164(8) 0.089(5) Uani 1 1 d . . .

H25A H 0.4134 0.8130 0.1190 0.106 Uiso 1 1 calc R . .

C26 C 0.2663(13) 0.8369(12) 0.1026(8) 0.087(4) Uani 1 1 d . . .

H26A H 0.2259 0.9114 0.0952 0.105 Uiso 1 1 calc R . .

C27 C 0.2320(14) 0.7669(16) 0.1010(10) 0.097(5) Uani 1 1 d . . .

H27A H 0.1644 0.7832 0.0916 0.116 Uiso 1 1 calc R . .

C28 C 0.3148(17) 0.6684(15) 0.1116(10) 0.104(5) Uani 1 1 d . . .

H28A H 0.3143 0.6039 0.1115 0.125 Uiso 1 1 calc R . .

C29 C 0.6522(12) 1.1475(14) 0.1210(9) 0.093(5) Uani 1 1 d . . .

H29A H 0.7040 1.0768 0.1318 0.112 Uiso 1 1 calc R . .

C30 C 0.5603(16) 1.1779(16) 0.1007(9) 0.095(5) Uani 1 1 d . . .

H30A H 0.5352 1.1314 0.0958 0.114 Uiso 1 1 calc R . .

C31 C 0.5076(14) 1.2838(19) 0.0884(10) 0.111(6) Uani 1 1 d . . .

H31A H 0.4417 1.3254 0.0713 0.134 Uiso 1 1 calc R . .

C32 C 0.572(2) 1.3186(16) 0.0992(11) 0.113(6) Uani 1 1 d . . .

H32A H 0.5563 1.3908 0.0936 0.136 Uiso 1 1 calc R . .

C33 C 0.6634(16) 1.2379(18) 0.1164(11) 0.107(6) Uani 1 1 d . . .

H33A H 0.7225 1.2417 0.1252 0.129 Uiso 1 1 calc R . .

C34 C 0.8019(11) 0.7780(12) 0.2382(12) 0.089(4) Uani 1 1 d . . .

C35 C 0.9306(12) 0.5995(14) 0.2071(12) 0.105(5) Uani 1 1 d . . .

C36 C 0.3198(14) 0.6452(15) 0.2897(10) 0.092(5) Uani 1 1 d . . .

C37 C 0.1329(17) 0.7175(15) 0.2664(12) 0.113(6) Uani 1 1 d . . .

C38 C 0.4081(15) 1.3346(13) 0.2551(11) 0.099(5) Uani 1 1 d . . .

C39 C 0.5751(12) 1.1885(12) 0.2906(10) 0.088(4) Uani 1 1 d . . .

 

loop_

 _atom_site_aniso_label

 _atom_site_aniso_U_11

 _atom_site_aniso_U_22

 _atom_site_aniso_U_33

 _atom_site_aniso_U_23

 _atom_site_aniso_U_13

 _atom_site_aniso_U_12

Hg1 0.0563(3) 0.0752(3) 0.0807(4) -0.0159(3) -0.0154(2) -0.0328(2)

Fe1 0.0525(9) 0.0722(11) 0.0829(13) -0.0183(10) -0.0297(9) -0.0179(8)

Fe2 0.0696(11) 0.0932(13) 0.0704(12) -0.0193(10) -0.0132(9) -0.0497(10)

Fe3 0.0646(10) 0.0829(12) 0.0668(12) -0.0213(10) -0.0078(9) -0.0428(9)

Se1 0.0681(8) 0.0701(8) 0.1463(15) -0.0230(9) -0.0417(9) -0.0294(7)

Se2 0.0518(7) 0.0715(8) 0.1029(11) -0.0185(7) -0.0166(7) -0.0297(6)

Se3 0.0611(8) 0.0700(8) 0.1338(13) -0.0217(8) -0.0479(8) -0.0214(6)

P1 0.071(2) 0.071(2) 0.073(2) -0.0078(18) -0.0321(18) -0.0260(17)

P2 0.0576(18) 0.085(2) 0.059(2) -0.0143(17) -0.0110(15) -0.0410(17)

P3 0.0548(17) 0.0667(19) 0.061(2) -0.0114(15) -0.0155(14) -0.0327(15)

O1 0.109(7) 0.051(5) 0.098(7) 0.001(5) -0.051(6) -0.025(5)

O2 0.120(8) 0.104(7) 0.074(7) -0.017(6) -0.036(6) -0.045(7)

O3 0.098(6) 0.099(6) 0.056(5) -0.004(5) -0.016(5) -0.066(6)

O4 0.045(4) 0.124(8) 0.074(6) -0.029(6) -0.010(4) -0.033(5)

O5 0.050(4) 0.055(4) 0.084(6) -0.010(4) -0.029(4) -0.023(4)

O6 0.078(6) 0.094(6) 0.065(6) -0.015(5) -0.008(5) -0.048(5)

O7 0.097(8) 0.141(10) 0.206(14) -0.098(11) -0.056(9) -0.035(7)

O8 0.108(9) 0.146(12) 0.178(14) -0.012(10) -0.093(10) 0.003(9)

O9 0.147(11) 0.112(9) 0.107(10) 0.015(8) -0.052(9) -0.069(8)

O10 0.133(12) 0.243(19) 0.243(19) -0.075(15) -0.002(12) -0.139(14)

O11 0.142(11) 0.096(8) 0.166(12) -0.065(9) -0.044(9) -0.039(8)

O12 0.107(9) 0.186(13) 0.112(10) -0.030(9) -0.038(8) -0.075(9)

O13 0.10(2) 0.13(3) 0.33(6) -0.09(3) -0.06(3) -0.01(2)

O14 0.045(15) 0.17(4) 0.41(9) 0.02(4) -0.05(3) -0.013(19)

O15 0.19(4) 0.20(5) 0.24(5) 0.02(3) -0.13(4) -0.12(4)

O16 0.22(4) 0.21(3) 0.12(2) 0.01(2) -0.06(2) -0.16(3)

O17 0.189(13) 0.145(11) 0.144(12) -0.023(9) -0.095(11) -0.075(10)

O18 0.085(9) 0.26(2) 0.177(15) -0.076(15) -0.020(10) 0.000(11)

O19 0.139(10) 0.121(9) 0.212(15) -0.028(9) -0.081(10) -0.077(8)

O20 0.107(9) 0.100(9) 0.254(18) 0.015(10) -0.080(10) -0.056(7)

O21 0.21(3) 0.106(18) 0.13(2) 0.044(16) -0.11(2) -0.06(2)

O22 0.13(2) 0.15(3) 0.18(3) 0.09(3) -0.09(2) -0.10(2)

O23 0.19(4) 0.25(6) 0.19(4) -0.14(5) -0.04(3) -0.07(3)

O24 0.110(16) 0.093(16) 0.065(14) -0.007(12) -0.031(12) -0.024(14)

Cl1 0.116(5) 0.116(5) 0.136(6) 0.005(5) -0.070(5) -0.058(5)

Cl2 0.078(2) 0.086(3) 0.112(3) -0.023(2) -0.030(2) -0.035(2)

Cl3 0.127(5) 0.096(5) 0.091(5) -0.025(4) -0.058(4) -0.017(4)

C1 0.121(13) 0.062(9) 0.122(14) -0.019(9) -0.049(11) -0.024(9)

C2 0.23(3) 0.103(14) 0.16(2) 0.015(13) -0.077(19) -0.111(17)

C3 0.130(16) 0.089(12) 0.17(2) -0.052(13) -0.040(15) 0.003(12)

C4 0.31(4) 0.20(3) 0.075(15) 0.007(17) -0.03(2) -0.17(3)

C5 0.23(3) 0.31(4) 0.13(2) -0.12(3) 0.04(2) -0.14(3)

C6 1.03(16) 0.16(3) 0.13(3) 0.04(3) -0.09(5) -0.16(6)

C7 0.115(12) 0.107(12) 0.071(10) -0.015(9) -0.022(9) -0.051(10)

C8 0.149(19) 0.32(4) 0.113(17) -0.11(2) 0.056(15) -0.14(2)

C9 0.17(2) 0.24(3) 0.098(15) -0.036(16) -0.070(15) -0.06(2)

C10 0.050(7) 0.130(13) 0.092(11) -0.030(9) -0.010(7) -0.053(8)

C11 0.123(17) 0.24(3) 0.23(3) 0.06(2) -0.095(19) -0.11(2)

C12 0.17(2) 0.112(17) 0.34(4) -0.01(2) -0.17(3) -0.035(15)

C13 0.078(9) 0.066(8) 0.087(10) -0.003(7) -0.034(8) -0.031(7)

C14 0.144(15) 0.090(11) 0.127(15) 0.015(10) -0.092(13) -0.050(11)

C15 0.077(11) 0.138(16) 0.128(16) -0.025(13) -0.033(11) 0.014(11)

C16 0.18(2) 0.23(3) 0.080(14) -0.046(15) 0.011(14) -0.16(2)

C17 0.23(3) 0.65(9) 0.15(3) 0.11(4) -0.06(2) -0.31(5)

C18 0.25(3) 0.55(7) 0.091(19) 0.09(3) -0.07(2) -0.25(4)

C19 0.131(16) 0.077(11) 0.084(12) -0.019(9) -0.019(11) -0.006(11)

C20 0.073(10) 0.136(16) 0.101(13) -0.018(11) -0.006(9) -0.053(11)

C21 0.117(14) 0.079(10) 0.108(13) -0.003(9) -0.029(11) -0.045(11)

C22 0.061(8) 0.116(14) 0.076(10) 0.016(9) -0.024(7) -0.040(9)

C23 0.159(18) 0.120(14) 0.063(10) 0.006(10) -0.043(11) -0.095(14)

C24 0.079(10) 0.134(16) 0.077(11) -0.032(10) -0.017(8) -0.025(10)

C25 0.101(12) 0.130(14) 0.051(8) -0.017(9) 0.005(8) -0.081(11)

C26 0.093(11) 0.087(10) 0.049(8) -0.013(7) -0.008(7) -0.022(9)

C27 0.100(12) 0.137(15) 0.088(11) -0.018(10) -0.042(9) -0.063(12)

C28 0.140(15) 0.123(15) 0.087(12) -0.033(10) -0.036(11) -0.069(13)

C29 0.066(9) 0.129(14) 0.077(10) -0.029(9) 0.002(7) -0.046(9)

C30 0.117(14) 0.132(15) 0.064(10) -0.028(10) 0.003(9) -0.089(12)

C31 0.091(11) 0.17(2) 0.063(10) -0.001(11) -0.013(8) -0.069(14)

C32 0.144(17) 0.110(14) 0.079(12) -0.013(10) 0.008(12) -0.084(14)

C33 0.100(13) 0.154(17) 0.083(12) -0.021(12) 0.013(10) -0.096(14)

C34 0.068(9) 0.089(10) 0.130(14) -0.028(10) -0.043(9) -0.030(8)

C35 0.062(9) 0.118(13) 0.123(14) -0.036(11) -0.037(9) -0.011(9)

C36 0.111(12) 0.125(14) 0.067(10) -0.021(10) -0.019(9) -0.073(11)

C37 0.139(15) 0.142(15) 0.117(14) -0.009(12) -0.040(12) -0.108(14)

C38 0.120(13) 0.091(11) 0.113(13) -0.040(10) -0.024(11) -0.059(10)

C39 0.074(9) 0.112(12) 0.082(11) -0.002(9) -0.022(8) -0.052(9)

 

_geom_special_details

;

 All esds (except the esd in the dihedral angle between two l.s. planes)

 are estimated using the full covariance matrix.  The cell esds are taken

 into account individually in the estimation of esds in distances, angles

 and torsion angles; correlations between esds in cell parameters are only

 used when they are defined by crystal symmetry.  An approximate (isotropic)

 treatment of cell esds is used for estimating esds involving l.s. planes.

;

 

loop_

 _geom_bond_atom_site_label_1

 _geom_bond_atom_site_label_2

 _geom_bond_distance

 _geom_bond_site_symmetry_2

 _geom_bond_publ_flag

Hg1 Se2 2.5208(14) . ?

Hg1 Se1 2.5322(16) . ?

Hg1 Se3 2.5375(14) . ?

Fe1 C35 1.751(17) . ?

Fe1 C34 1.764(18) . ?

Fe1 C22 2.078(14) . ?

Fe1 C19 2.081(17) . ?

Fe1 C21 2.088(16) . ?

Fe1 C23 2.094(15) . ?

Fe1 C20 2.107(16) . ?

Fe1 P1 2.195(4) . ?

Fe2 C36 1.75(2) . ?

Fe2 C37 1.762(18) . ?

Fe2 C24 2.082(15) . ?

Fe2 C25 2.088(13) . ?

Fe2 C27 2.088(15) . ?

Fe2 C26 2.089(14) . ?

Fe2 C28 2.098(16) . ?

Fe2 P2 2.208(4) . ?

Fe3 C38 1.712(18) . ?

Fe3 C39 1.744(17) . ?

Fe3 C30 2.064(15) . ?

Fe3 C31 2.072(17) . ?

Fe3 C29 2.075(14) . ?

Fe3 C32 2.076(16) . ?

Fe3 C33 2.142(14) . ?

Fe3 P3 2.196(3) . ?

Se1 P1 2.218(4) . ?

Se2 P2 2.197(3) . ?

Se3 P3 2.200(3) . ?

P1 O2 1.575(10) . ?

P1 O1 1.591(9) . ?

P2 O3 1.584(9) . ?

P2 O4 1.596(9) . ?

P3 O5 1.583(8) . ?

P3 O6 1.588(9) . ?

O1 C1 1.467(18) . ?

O2 C4 1.42(3) . ?

O3 C7 1.446(17) . ?

O4 C10 1.456(17) . ?

O5 C13 1.460(14) . ?

O6 C16 1.50(2) . ?

O7 C34 1.121(17) . ?

O8 C35 1.139(17) . ?

O9 C36 1.160(19) . ?

O10 C37 1.126(18) . ?

O11 C38 1.160(18) . ?

O12 C39 1.145(17) . ?

O13 Cl1 1.407(10) . ?

O13 O15 1.56(5) . ?

O13 O14 1.69(4) 2_575 ?

O14 O15 1.08(5) . ?

O14 Cl1 1.386(10) . ?

O14 O13 1.69(4) 2_575 ?

O14 O16 1.78(5) 2_575 ?

O15 Cl1 1.395(10) . ?

O16 Cl1 1.416(10) . ?

O16 O14 1.78(5) 2_575 ?

O17 Cl2 1.402(13) . ?

O18 Cl2 1.355(15) . ?

O19 Cl2 1.437(11) . ?

O20 Cl2 1.387(12) . ?

O21 Cl3 1.423(10) . ?

O22 O23 1.22(4) . ?

O22 Cl3 1.385(10) . ?

O22 O24 1.43(4) 2_655 ?

O23 Cl3 1.399(10) . ?

O23 O24 1.57(4) . ?

O24 Cl3 1.386(9) . ?

O24 O22 1.43(4) 2_655 ?

Cl1 O14 1.386(10) 2_575 ?

Cl1 O15 1.395(10) 2_575 ?

Cl1 O13 1.407(10) 2_575 ?

Cl1 O16 1.416(10) 2_575 ?

Cl3 O22 1.385(10) 2_655 ?

Cl3 O24 1.386(9) 2_655 ?

Cl3 O23 1.399(10) 2_655 ?

Cl3 O21 1.423(10) 2_655 ?

C1 C3 1.47(2) . ?

C1 C2 1.47(2) . ?

C4 C6 1.43(5) . ?

C4 C5 1.43(3) . ?

C7 C9 1.49(2) . ?

C7 C8 1.51(2) . ?

C10 C11 1.47(2) . ?

C10 C12 1.49(2) . ?

C13 C14 1.457(19) . ?

C13 C15 1.51(2) . ?

C16 C17 1.38(3) . ?

C16 C18 1.40(3) . ?

C19 C23 1.39(3) . ?

C19 C20 1.42(3) . ?

C20 C21 1.37(2) . ?

C21 C22 1.38(2) . ?

C22 C23 1.34(2) . ?

C24 C28 1.39(2) . ?

C24 C25 1.40(2) . ?

C25 C26 1.42(2) . ?

C26 C27 1.39(2) . ?

C27 C28 1.41(2) . ?

C29 C30 1.37(2) . ?

C29 C33 1.43(2) . ?

C30 C31 1.39(2) . ?

C31 C32 1.39(3) . ?

C32 C33 1.38(3) . ?

 

loop_

 _geom_angle_atom_site_label_1

 _geom_angle_atom_site_label_2

 _geom_angle_atom_site_label_3

 _geom_angle

 _geom_angle_site_symmetry_1

 _geom_angle_site_symmetry_3

 _geom_angle_publ_flag

Se2 Hg1 Se1 120.48(5) . . ?

Se2 Hg1 Se3 120.25(5) . . ?

Se1 Hg1 Se3 118.91(5) . . ?

C35 Fe1 C34 91.3(7) . . ?

C35 Fe1 C22 157.7(8) . . ?

C34 Fe1 C22 107.3(8) . . ?

C35 Fe1 C19 93.1(8) . . ?

C34 Fe1 C19 150.3(9) . . ?

C22 Fe1 C19 64.6(7) . . ?

C35 Fe1 C21 132.1(8) . . ?

C34 Fe1 C21 90.7(8) . . ?

C22 Fe1 C21 38.6(6) . . ?

C19 Fe1 C21 65.0(7) . . ?

C35 Fe1 C23 124.2(9) . . ?

C34 Fe1 C23 144.3(8) . . ?

C22 Fe1 C23 37.4(6) . . ?

C19 Fe1 C23 39.0(7) . . ?

C21 Fe1 C23 63.8(7) . . ?

C35 Fe1 C20 97.9(8) . . ?

C34 Fe1 C20 110.8(8) . . ?

C22 Fe1 C20 64.4(6) . . ?

C19 Fe1 C20 39.5(7) . . ?

C21 Fe1 C20 38.2(6) . . ?

C23 Fe1 C20 64.7(7) . . ?

C35 Fe1 P1 89.7(6) . . ?

C34 Fe1 P1 91.4(5) . . ?

C22 Fe1 P1 101.7(4) . . ?

C19 Fe1 P1 118.0(7) . . ?

C21 Fe1 P1 138.1(5) . . ?

C23 Fe1 P1 92.4(5) . . ?

C20 Fe1 P1 156.2(6) . . ?

C36 Fe2 C37 95.0(8) . . ?

C36 Fe2 C24 87.1(7) . . ?

C37 Fe2 C24 133.8(8) . . ?

C36 Fe2 C25 107.6(7) . . ?

C37 Fe2 C25 154.4(8) . . ?

C24 Fe2 C25 39.4(6) . . ?

C36 Fe2 C27 144.3(8) . . ?

C37 Fe2 C27 88.3(7) . . ?

C24 Fe2 C27 65.9(7) . . ?

C25 Fe2 C27 66.4(6) . . ?

C36 Fe2 C26 147.3(7) . . ?

C37 Fe2 C26 116.7(8) . . ?

C24 Fe2 C26 65.7(6) . . ?

C25 Fe2 C26 39.7(6) . . ?

C27 Fe2 C26 38.8(6) . . ?

C36 Fe2 C28 105.1(8) . . ?

C37 Fe2 C28 97.2(8) . . ?

C24 Fe2 C28 38.9(7) . . ?

C25 Fe2 C28 65.9(6) . . ?

C27 Fe2 C28 39.4(6) . . ?

C26 Fe2 C28 65.3(7) . . ?

C36 Fe2 P2 91.9(5) . . ?

C37 Fe2 P2 90.3(6) . . ?

C24 Fe2 P2 135.8(6) . . ?

C25 Fe2 P2 100.5(5) . . ?

C27 Fe2 P2 123.7(6) . . ?

C26 Fe2 P2 95.4(4) . . ?

C28 Fe2 P2 160.7(6) . . ?

C38 Fe3 C39 94.8(8) . . ?

C38 Fe3 C30 132.2(9) . . ?

C39 Fe3 C30 133.0(8) . . ?

C38 Fe3 C31 97.1(9) . . ?

C39 Fe3 C31 156.4(7) . . ?

C30 Fe3 C31 39.2(7) . . ?

C38 Fe3 C29 159.3(8) . . ?

C39 Fe3 C29 97.1(7) . . ?

C30 Fe3 C29 38.6(6) . . ?

C31 Fe3 C29 66.2(7) . . ?

C38 Fe3 C32 94.1(8) . . ?

C39 Fe3 C32 119.7(9) . . ?

C30 Fe3 C32 64.6(7) . . ?

C31 Fe3 C32 39.2(7) . . ?

C29 Fe3 C32 65.2(7) . . ?

C38 Fe3 C33 123.6(8) . . ?

C39 Fe3 C33 91.0(7) . . ?

C30 Fe3 C33 64.8(6) . . ?

C31 Fe3 C33 65.5(7) . . ?

C29 Fe3 C33 39.6(6) . . ?

C32 Fe3 C33 38.1(7) . . ?

C38 Fe3 P3 92.3(5) . . ?

C39 Fe3 P3 90.5(5) . . ?

C30 Fe3 P3 88.5(4) . . ?

C31 Fe3 P3 109.3(6) . . ?

C29 Fe3 P3 104.4(5) . . ?

C32 Fe3 P3 148.4(7) . . ?

C33 Fe3 P3 143.8(6) . . ?

P1 Se1 Hg1 106.66(11) . . ?

P2 Se2 Hg1 107.77(10) . . ?

P3 Se3 Hg1 106.67(9) . . ?

O2 P1 O1 100.4(6) . . ?

O2 P1 Fe1 109.6(5) . . ?

O1 P1 Fe1 114.3(4) . . ?

O2 P1 Se1 107.9(4) . . ?

O1 P1 Se1 101.7(4) . . ?

Fe1 P1 Se1 120.81(17) . . ?

O3 P2 O4 101.2(5) . . ?

O3 P2 Se2 108.9(3) . . ?

O4 P2 Se2 101.0(4) . . ?

O3 P2 Fe2 106.4(4) . . ?

O4 P2 Fe2 115.2(4) . . ?

Se2 P2 Fe2 122.24(15) . . ?

O5 P3 O6 107.8(5) . . ?

O5 P3 Fe3 117.7(3) . . ?

O6 P3 Fe3 106.6(4) . . ?

O5 P3 Se3 105.0(3) . . ?

O6 P3 Se3 108.9(4) . . ?

Fe3 P3 Se3 110.67(14) . . ?

C1 O1 P1 127.8(9) . . ?

C4 O2 P1 124.1(13) . . ?

C7 O3 P2 124.9(9) . . ?

C10 O4 P2 126.3(8) . . ?

C13 O5 P3 126.2(7) . . ?

C16 O6 P3 126.8(10) . . ?

Cl1 O13 O15 55.8(13) . . ?

Cl1 O13 O14 52.2(11) . 2_575 ?

O15 O13 O14 104(2) . 2_575 ?

O15 O14 Cl1 67.6(13) . . ?

O15 O14 O13 113(3) . 2_575 ?

Cl1 O14 O13 53.4(12) . 2_575 ?

O15 O14 O16 93(4) . 2_575 ?

Cl1 O14 O16 51.3(15) . 2_575 ?

O13 O14 O16 75(2) 2_575 2_575 ?

O14 O15 Cl1 66.8(15) . . ?

O14 O15 O13 114(4) . . ?

Cl1 O15 O13 56.6(13) . . ?

Cl1 O16 O14 49.8(14) . 2_575 ?

O23 O22 Cl3 64.5(12) . . ?

O23 O22 O24 119.8(18) . 2_655 ?

Cl3 O22 O24 59.0(11) . 2_655 ?

O22 O23 Cl3 63.3(12) . . ?

O22 O23 O24 115.6(16) . . ?

Cl3 O23 O24 55.2(10) . . ?

Cl3 O24 O22 58.9(11) . 2_655 ?

Cl3 O24 O23 56.0(10) . . ?

O22 O24 O23 112.7(13) 2_655 . ?

O14 Cl1 O14 179.998(5) 2_575 . ?

O14 Cl1 O15 134(2) 2_575 . ?

O14 Cl1 O15 46(2) . . ?

O14 Cl1 O15 46(2) 2_575 2_575 ?

O14 Cl1 O15 134(2) . 2_575 ?

O15 Cl1 O15 179.999(5) . 2_575 ?

O14 Cl1 O13 106(2) 2_575 2_575 ?

O14 Cl1 O13 74(2) . 2_575 ?

O15 Cl1 O13 112(2) . 2_575 ?

O15 Cl1 O13 68(2) 2_575 2_575 ?

O14 Cl1 O13 74(2) 2_575 . ?

O14 Cl1 O13 106(2) . . ?

O15 Cl1 O13 68(2) . . ?

O15 Cl1 O13 112(2) 2_575 . ?

O13 Cl1 O13 179.999(5) 2_575 . ?

O14 Cl1 O16 79(3) 2_575 . ?

O14 Cl1 O16 101(3) . . ?

O15 Cl1 O16 81(2) . . ?

O15 Cl1 O16 99(2) 2_575 . ?

O13 Cl1 O16 83(2) 2_575 . ?

O13 Cl1 O16 97(2) . . ?

O14 Cl1 O16 101(3) 2_575 2_575 ?

O14 Cl1 O16 79(3) . 2_575 ?

O15 Cl1 O16 99(2) . 2_575 ?

O15 Cl1 O16 81(2) 2_575 2_575 ?

O13 Cl1 O16 97(2) 2_575 2_575 ?

O13 Cl1 O16 83(2) . 2_575 ?

O16 Cl1 O16 179.998(5) . 2_575 ?

O18 Cl2 O20 111.3(12) . . ?

O18 Cl2 O17 109.4(10) . . ?

O20 Cl2 O17 109.8(10) . . ?

O18 Cl2 O19 108.9(11) . . ?

O20 Cl2 O19 107.4(7) . . ?

O17 Cl2 O19 109.9(9) . . ?

O22 Cl3 O22 179.999(2) 2_655 . ?

O22 Cl3 O24 117.9(19) 2_655 2_655 ?

O22 Cl3 O24 62.1(19) . 2_655 ?

O22 Cl3 O24 62.1(19) 2_655 . ?

O22 Cl3 O24 117.9(19) . . ?

O24 Cl3 O24 179.994(2) 2_655 . ?

O22 Cl3 O23 52(2) 2_655 2_655 ?

O22 Cl3 O23 128(2) . 2_655 ?

O24 Cl3 O23 68.7(18) 2_655 2_655 ?

O24 Cl3 O23 111.3(18) . 2_655 ?

O22 Cl3 O23 128(2) 2_655 . ?

O22 Cl3 O23 52(2) . . ?

O24 Cl3 O23 111.3(18) 2_655 . ?

O24 Cl3 O23 68.7(18) . . ?

O23 Cl3 O23 179.999(3) 2_655 . ?

O22 Cl3 O21 84.8(14) 2_655 2_655 ?

O22 Cl3 O21 95.2(14) . 2_655 ?

O24 Cl3 O21 82.1(15) 2_655 2_655 ?

O24 Cl3 O21 97.9(15) . 2_655 ?

O23 Cl3 O21 94(2) 2_655 2_655 ?

O23 Cl3 O21 86(2) . 2_655 ?

O22 Cl3 O21 95.2(14) 2_655 . ?

O22 Cl3 O21 84.8(14) . . ?

O24 Cl3 O21 97.9(15) 2_655 . ?

O24 Cl3 O21 82.1(15) . . ?

O23 Cl3 O21 86(2) 2_655 . ?

O23 Cl3 O21 94(2) . . ?

O21 Cl3 O21 179.996(2) 2_655 . ?

O1 C1 C3 109.4(15) . . ?

O1 C1 C2 106.6(15) . . ?

C3 C1 C2 116.4(16) . . ?

O2 C4 C6 104(4) . . ?

O2 C4 C5 111(2) . . ?

C6 C4 C5 114(3) . . ?

O3 C7 C9 108.0(14) . . ?

O3 C7 C8 107.3(14) . . ?

C9 C7 C8 115.1(18) . . ?

O4 C10 C11 109.4(14) . . ?

O4 C10 C12 112.5(13) . . ?

C11 C10 C12 108.5(17) . . ?

C14 C13 O5 109.9(11) . . ?

C14 C13 C15 111.7(14) . . ?

O5 C13 C15 107.6(12) . . ?

C17 C16 C18 122.7(19) . . ?

C17 C16 O6 115(2) . . ?

C18 C16 O6 108.8(18) . . ?

C23 C19 C20 106.4(15) . . ?

C23 C19 Fe1 71.0(9) . . ?

C20 C19 Fe1 71.2(10) . . ?

C21 C20 C19 106.9(15) . . ?

C21 C20 Fe1 70.2(9) . . ?

C19 C20 Fe1 69.3(10) . . ?

C20 C21 C22 108.6(16) . . ?

C20 C21 Fe1 71.6(10) . . ?

C22 C21 Fe1 70.3(9) . . ?

C23 C22 C21 109.0(15) . . ?

C23 C22 Fe1 72.0(9) . . ?

C21 C22 Fe1 71.1(9) . . ?

C22 C23 C19 109.0(15) . . ?

C22 C23 Fe1 70.7(9) . . ?

C19 C23 Fe1 70.0(10) . . ?

C28 C24 C25 108.9(16) . . ?

C28 C24 Fe2 71.2(10) . . ?

C25 C24 Fe2 70.6(9) . . ?

C24 C25 C26 106.4(14) . . ?

C24 C25 Fe2 70.1(9) . . ?

C26 C25 Fe2 70.2(8) . . ?

C27 C26 C25 109.1(14) . . ?

C27 C26 Fe2 70.6(9) . . ?

C25 C26 Fe2 70.1(8) . . ?

C26 C27 C28 107.4(14) . . ?

C26 C27 Fe2 70.6(8) . . ?

C28 C27 Fe2 70.6(9) . . ?

C24 C28 C27 108.1(16) . . ?

C24 C28 Fe2 69.9(9) . . ?

C27 C28 Fe2 69.9(9) . . ?

C30 C29 C33 107.3(17) . . ?

C30 C29 Fe3 70.2(9) . . ?

C33 C29 Fe3 72.7(9) . . ?

C29 C30 C31 110.4(15) . . ?

C29 C30 Fe3 71.1(9) . . ?

C31 C30 Fe3 70.7(10) . . ?

C30 C31 C32 105.5(17) . . ?

C30 C31 Fe3 70.1(10) . . ?

C32 C31 Fe3 70.5(10) . . ?

C33 C32 C31 110.9(18) . . ?

C33 C32 Fe3 73.6(10) . . ?

C31 C32 Fe3 70.3(9) . . ?

C32 C33 C29 105.7(16) . . ?

C32 C33 Fe3 68.3(9) . . ?

C29 C33 Fe3 67.7(8) . . ?

O7 C34 Fe1 174.1(14) . . ?

O8 C35 Fe1 177.9(19) . . ?

O9 C36 Fe2 178.1(15) . . ?

O10 C37 Fe2 178.2(19) . . ?

O11 C38 Fe3 176.7(17) . . ?

O12 C39 Fe3 179.2(16) . . ?

 

_diffrn_measured_fraction_theta_max    0.948

_diffrn_reflns_theta_full              25.00

_diffrn_measured_fraction_theta_full   0.948

_refine_diff_density_max    1.285

_refine_diff_density_min   -1.843

_refine_diff_density_rms    0.157


#===END


 
data_4 
  
_audit_creation_method            SHELXL-97 
_chemical_name_systematic 
; 
 ? 
; 
_chemical_name_common             ? 
_chemical_melting_point           ? 
_chemical_formula_moiety          ? 
_chemical_formula_sum 
 'C52 H76 Fe4 Hg2 I4 O16 P4 Se4' 
_chemical_formula_weight          2529.03 
  
loop_ 
 _atom_type_symbol 
 _atom_type_description 
 _atom_type_scat_dispersion_real 
 _atom_type_scat_dispersion_imag 
 _atom_type_scat_source 
 'C'  'C'   0.0033   0.0016 
 'International Tables Vol C Tables 4.2.6.8 and 6.1.1.4' 
 'H'  'H'   0.0000   0.0000 
 'International Tables Vol C Tables 4.2.6.8 and 6.1.1.4' 
 'O'  'O'   0.0106   0.0060 
 'International Tables Vol C Tables 4.2.6.8 and 6.1.1.4' 
 'P'  'P'   0.1023   0.0942 
 'International Tables Vol C Tables 4.2.6.8 and 6.1.1.4' 
 'Se'  'Se'  -0.0929   2.2259 
 'International Tables Vol C Tables 4.2.6.8 and 6.1.1.4' 
 'Hg'  'Hg'  -2.3894   9.2266 
 'International Tables Vol C Tables 4.2.6.8 and 6.1.1.4' 
 'Fe'  'Fe'   0.3463   0.8444 
 'International Tables Vol C Tables 4.2.6.8 and 6.1.1.4' 
 'I'  'I'  -0.4742   1.8119 
 'International Tables Vol C Tables 4.2.6.8 and 6.1.1.4' 
  
_symmetry_cell_setting            Triclinic 
_symmetry_space_group_name_H-M    P-1 
  
loop_ 
 _symmetry_equiv_pos_as_xyz 
 'x, y, z' 
 '-x, -y, -z' 
  
_cell_length_a                    14.5017(8) 
_cell_length_b                    16.9017(9) 
_cell_length_c                    18.8419(10) 
_cell_angle_alpha                 70.113(2) 
_cell_angle_beta                  89.403(2) 
_cell_angle_gamma                 75.863(2) 
_cell_volume                      4197.9(4) 
_cell_formula_units_Z             2 
_cell_measurement_temperature     298(2) 
_cell_measurement_reflns_used     3233 
_cell_measurement_theta_min       2.20 
_cell_measurement_theta_max       19.95 
  
_exptl_crystal_description        plate 
_exptl_crystal_colour             colourless 
_exptl_crystal_size_max           0.30 
_exptl_crystal_size_mid           0.10 
_exptl_crystal_size_min           0.10 
_exptl_crystal_density_meas       ? 
_exptl_crystal_density_diffrn     2.001 
_exptl_crystal_density_method     'not measured' 
_exptl_crystal_F_000              2376 
_exptl_absorpt_coefficient_mu     7.648 
_exptl_absorpt_correction_type    multi-scan 
_exptl_absorpt_correction_T_min   0.1871
_exptl_absorpt_correction_T_max   0.4561 
_exptl_absorpt_process_details    SADABS 
  
_exptl_special_details 
; 
 ? 
; 
  
_diffrn_ambient_temperature       298(2) 
_diffrn_radiation_wavelength      0.71073 
_diffrn_radiation_type            MoK\a 
_diffrn_radiation_source          'fine-focus sealed tube' 
_diffrn_radiation_monochromator   graphite 
_diffrn_measurement_device_type   'CCD area detector' 
_diffrn_measurement_method        'phi and omega scans' 
_diffrn_detector_area_resol_mean  ? 
_diffrn_reflns_number             25567 
_diffrn_reflns_av_R_equivalents   0.0607 
_diffrn_reflns_av_sigmaI/netI     0.1232 
_diffrn_reflns_limit_h_min        -17 
_diffrn_reflns_limit_h_max        17 
_diffrn_reflns_limit_k_min        -14 
_diffrn_reflns_limit_k_max        20 
_diffrn_reflns_limit_l_min        -20 
_diffrn_reflns_limit_l_max        22 
_diffrn_reflns_theta_min          1.45 
_diffrn_reflns_theta_max          25.00 
_reflns_number_total              14669 
_reflns_number_gt                 7135 
_reflns_threshold_expression      >2sigma(I) 
  
_computing_data_collection        'Bruker SMART' 
_computing_cell_refinement        'Bruker SMART' 
_computing_data_reduction         'Bruker SAINT' 
_computing_structure_solution     'SHELXS-97 (Sheldrick, 2008)' 
_computing_structure_refinement   'SHELXL-97 (Sheldrick, 2008)' 
_computing_molecular_graphics     'Bruker SHELXTL' 
_computing_publication_material   'Bruker SHELXTL' 
  
_refine_special_details 
; 
 Refinement of F^2^ against ALL reflections.  The weighted R-factor wR and 
 goodness of fit S are based on F^2^, conventional R-factors R are based 
 on F, with F set to zero for negative F^2^. The threshold expression of 
 F^2^ > 2sigma(F^2^) is used only for calculating R-factors(gt) etc. and is 
 not relevant to the choice of reflections for refinement.  R-factors based 
 on F^2^ are statistically about twice as large as those based on F, and R- 
 factors based on ALL data will be even larger. 
; 
  
_refine_ls_structure_factor_coef  Fsqd 
_refine_ls_matrix_type            full 
_refine_ls_weighting_scheme       calc 
_refine_ls_weighting_details 
 'calc w=1/[\s^2^(Fo^2^)+(0.0000P)^2^+0.0000P] where P=(Fo^2^+2Fc^2^)/3' 
_atom_sites_solution_primary      direct 
_atom_sites_solution_secondary    difmap 
_atom_sites_solution_hydrogens    geom 
_refine_ls_hydrogen_treatment     constr 
_refine_ls_extinction_method      none 
_refine_ls_extinction_coef        ? 
_refine_ls_number_reflns          14669 
_refine_ls_number_parameters      735 
_refine_ls_number_restraints      4 
_refine_ls_R_factor_all           0.1431 
_refine_ls_R_factor_gt            0.0605 
_refine_ls_wR_factor_ref          0.1155 
_refine_ls_wR_factor_gt           0.1036 
_refine_ls_goodness_of_fit_ref    1.027 
_refine_ls_restrained_S_all       1.027 
_refine_ls_shift/su_max           0.001 
_refine_ls_shift/su_mean          0.000 
  
loop_ 
 _atom_site_label 
 _atom_site_type_symbol 
 _atom_site_fract_x 
 _atom_site_fract_y 
 _atom_site_fract_z 
 _atom_site_U_iso_or_equiv 
 _atom_site_adp_type 
 _atom_site_occupancy 
 _atom_site_symmetry_multiplicity 
 _atom_site_calc_flag 
 _atom_site_refinement_flags 
 _atom_site_disorder_assembly 
 _atom_site_disorder_group 
I1 I 0.24828(8) 0.52056(7) 1.11464(5) 0.1086(4) Uani 1 1 d . . . 
I2 I 0.22437(8) 0.80548(8) 1.04463(6) 0.1131(4) Uani 1 1 d . . . 
I3 I 0.72530(8) 0.80955(7) 0.27298(5) 0.1054(4) Uani 1 1 d . . . 
I4 I 0.74729(9) 0.52414(7) 0.37481(6) 0.1086(4) Uani 1 1 d . . . 
Fe1 Fe -0.19892(12) 0.67479(10) 1.03864(9) 0.0588(4) Uani 1 1 d . . . 
Fe2 Fe 0.40485(12) 0.70438(11) 0.70668(8) 0.0594(5) Uani 1 1 d . . . 
Fe4 Fe 0.30628(12) 0.67628(10) 0.35476(9) 0.0600(5) Uani 1 1 d . . . 
Fe3 Fe 0.90074(13) 0.70463(12) 0.67071(9) 0.0701(5) Uani 1 1 d . . . 
Hg1 Hg 0.18704(3) 0.68032(3) 0.99855(3) 0.06586(16) Uani 1 1 d . . . 
Hg2 Hg 0.68611(4) 0.68400(3) 0.39431(3) 0.06892(17) Uani 1 1 d . . . 
Se1 Se 0.02016(9) 0.68318(10) 0.94102(8) 0.0820(4) Uani 1 1 d . . . 
Se2 Se 0.26195(10) 0.65390(9) 0.87029(7) 0.0784(4) Uani 1 1 d . . . 
Se3 Se 0.76341(9) 0.65208(8) 0.53807(7) 0.0728(4) Uani 1 1 d . . . 
Se4 Se 0.51680(9) 0.69333(11) 0.44855(7) 0.0913(5) Uani 1 1 d . . . 
P1 P -0.0848(2) 0.74145(19) 1.00431(16) 0.0503(8) Uani 1 1 d . . . 
P2 P 0.3502(2) 0.7349(2) 0.80613(17) 0.0552(8) Uani 1 1 d . . . 
P3 P 0.8465(2) 0.7367(2) 0.55307(16) 0.0589(9) Uani 1 1 d . . . 
P4 P 0.4133(2) 0.7498(2) 0.35078(16) 0.0572(8) Uani 1 1 d . . . 
O1 O -0.0223(5) 0.7469(5) 1.0687(4) 0.079(2) Uani 1 1 d . . . 
O2 O -0.1353(5) 0.8380(5) 0.9523(4) 0.074(2) Uani 1 1 d . . . 
O3 O 0.4407(6) 0.7257(6) 0.8561(5) 0.099(3) Uani 1 1 d . . . 
O4 O 0.2956(7) 0.8330(5) 0.7790(5) 0.093(3) Uani 1 1 d D . . 
O5 O 0.9361(6) 0.7369(7) 0.5050(5) 0.100(3) Uani 1 1 d . . . 
O6 O 0.7853(6) 0.8364(5) 0.5260(5) 0.089(3) Uani 1 1 d . . . 
O7 O 0.3562(6) 0.8416(5) 0.3458(5) 0.079(2) Uani 1 1 d . . . 
O8 O 0.4780(5) 0.7602(6) 0.2816(4) 0.082(3) Uani 1 1 d . . . 
O9 O -0.2579(7) 0.7269(7) 0.8813(5) 0.107(3) Uani 1 1 d . . . 
O10 O -0.3236(7) 0.8305(7) 1.0538(6) 0.107(4) Uani 1 1 d . . . 
O11 O 0.4696(9) 0.8623(7) 0.6569(7) 0.145(5) Uani 1 1 d . . . 
O12 O 0.2188(9) 0.7787(9) 0.6292(6) 0.157(5) Uani 1 1 d . . . 
O13 O 0.7091(9) 0.7616(10) 0.7092(6) 0.167(6) Uani 1 1 d . . . 
O14 O 0.9451(11) 0.8722(9) 0.6284(8) 0.181(6) Uani 1 1 d . . . 
O15 O 0.1734(6) 0.8284(6) 0.2477(5) 0.093(3) Uani 1 1 d . . . 
O16 O 0.2370(7) 0.7202(7) 0.4854(5) 0.107(3) Uani 1 1 d . . . 
C1 C -0.0573(9) 0.7670(10) 1.1358(7) 0.085(4) Uani 1 1 d . . . 
H1A H -0.1200 0.7552 1.1452 0.102 Uiso 1 1 calc R . . 
C2 C 0.0168(12) 0.7033(11) 1.2010(8) 0.142(7) Uani 1 1 d . . . 
H2A H -0.0017 0.7112 1.2477 0.213 Uiso 1 1 calc R . . 
H2B H 0.0783 0.7145 1.1910 0.213 Uiso 1 1 calc R . . 
H2C H 0.0199 0.6445 1.2049 0.213 Uiso 1 1 calc R . . 
C3 C -0.0633(12) 0.8575(10) 1.1266(9) 0.131(7) Uani 1 1 d . . . 
H3A H -0.1108 0.8953 1.0865 0.197 Uiso 1 1 calc R . . 
H3B H -0.0026 0.8696 1.1143 0.197 Uiso 1 1 calc R . . 
H3C H -0.0803 0.8671 1.1729 0.197 Uiso 1 1 calc R . . 
C4 C -0.0933(11) 0.8966(10) 0.8943(9) 0.105(5) Uani 1 1 d . . . 
H4A H -0.0274 0.8662 0.8911 0.125 Uiso 1 1 calc R . . 
C5 C -0.1432(18) 0.9219(16) 0.8245(11) 0.272(17) Uani 1 1 d . . . 
H5A H -0.1377 0.8720 0.8097 0.408 Uiso 1 1 calc R . . 
H5B H -0.1173 0.9640 0.7875 0.408 Uiso 1 1 calc R . . 
H5C H -0.2092 0.9472 0.8281 0.408 Uiso 1 1 calc R . . 
C6 C -0.092(2) 0.9723(13) 0.9173(12) 0.261(16) Uani 1 1 d . . . 
H6A H -0.0639 1.0119 0.8796 0.391 Uiso 1 1 calc R . . 
H6B H -0.0552 0.9523 0.9650 0.391 Uiso 1 1 calc R . . 
H6C H -0.1561 1.0016 0.9222 0.391 Uiso 1 1 calc R . . 
C7 C 0.4825(19) 0.8101(17) 0.9179(14) 0.254(13) Uiso 1 1 d . . . 
H7A H 0.4910 0.8240 0.9623 0.381 Uiso 1 1 calc R . . 
H7B H 0.4326 0.8551 0.8839 0.381 Uiso 1 1 calc R . . 
H7C H 0.5408 0.8056 0.8932 0.381 Uiso 1 1 calc R . . 
C8 C 0.487(2) 0.6357(18) 0.9804(16) 0.275(17) Uiso 1 1 d . . . 
H8A H 0.4971 0.6257 1.0333 0.413 Uiso 1 1 calc R . . 
H8B H 0.5460 0.6118 0.9624 0.413 Uiso 1 1 calc R . . 
H8C H 0.4395 0.6082 0.9728 0.413 Uiso 1 1 calc R . . 
C9 C 0.457(2) 0.727(2) 0.9396(15) 0.249(16) Uani 1 1 d . . . 
H9A H 0.3911 0.7421 0.9538 0.299 Uiso 1 1 calc R . . 
C10 C 0.2028(13) 0.8809(13) 0.8072(12) 0.161(8) Uiso 1 1 d D . . 
H10A H 0.1931 0.8425 0.8574 0.193 Uiso 1 1 calc R . . 
C11 C 0.2344(17) 0.9493(16) 0.8161(13) 0.241(12) Uiso 1 1 d . . . 
H11A H 0.1831 0.9869 0.8310 0.361 Uiso 1 1 calc R . . 
H11B H 0.2551 0.9818 0.7690 0.361 Uiso 1 1 calc R . . 
H11C H 0.2867 0.9260 0.8544 0.361 Uiso 1 1 calc R . . 
C12 C 0.1245(18) 0.8926(15) 0.7564(13) 0.233(11) Uiso 1 1 d . . . 
H12A H 0.0667 0.9213 0.7722 0.350 Uiso 1 1 calc R . . 
H12B H 0.1196 0.8369 0.7566 0.350 Uiso 1 1 calc R . . 
H12C H 0.1344 0.9274 0.7062 0.350 Uiso 1 1 calc R . . 
C13 C 0.9441(10) 0.7284(14) 0.4314(8) 0.117(6) Uani 1 1 d . . . 
H13A H 0.8802 0.7368 0.4089 0.140 Uiso 1 1 calc R . . 
C14 C 1.0018(15) 0.6402(14) 0.4401(11) 0.183(10) Uani 1 1 d . . . 
H14A H 0.9697 0.5980 0.4696 0.274 Uiso 1 1 calc R . . 
H14B H 1.0629 0.6301 0.4653 0.274 Uiso 1 1 calc R . . 
H14C H 1.0102 0.6351 0.3911 0.274 Uiso 1 1 calc R . . 
C15 C 0.9885(12) 0.8023(13) 0.3815(9) 0.170(9) Uani 1 1 d . . . 
H15A H 0.9478 0.8579 0.3778 0.254 Uiso 1 1 calc R . . 
H15B H 0.9948 0.7989 0.3318 0.254 Uiso 1 1 calc R . . 
H15C H 1.0502 0.7956 0.4041 0.254 Uiso 1 1 calc R . . 
C16 C 0.7193(13) 0.8804(10) 0.4617(8) 0.105(5) Uani 1 1 d . . . 
H16A H 0.7231 0.8456 0.4289 0.126 Uiso 1 1 calc R . . 
C17 C 0.7514(15) 0.9619(12) 0.4231(9) 0.176(9) Uani 1 1 d . . . 
H17A H 0.8133 0.9468 0.4055 0.264 Uiso 1 1 calc R . . 
H17B H 0.7545 0.9911 0.4583 0.264 Uiso 1 1 calc R . . 
H17C H 0.7068 0.9996 0.3809 0.264 Uiso 1 1 calc R . . 
C18 C 0.6243(13) 0.8981(11) 0.4882(11) 0.159(8) Uani 1 1 d . . . 
H18A H 0.6054 0.8447 0.5090 0.238 Uiso 1 1 calc R . . 
H18B H 0.5798 0.9376 0.4465 0.238 Uiso 1 1 calc R . . 
H18C H 0.6250 0.9237 0.5264 0.238 Uiso 1 1 calc R . . 
C19 C 0.309(2) 0.948(2) 0.4044(18) 0.44(3) Uiso 1 1 d D . . 
H19A H 0.2925 0.9096 0.4506 0.655 Uiso 1 1 calc R . . 
H19B H 0.2560 0.9690 0.3669 0.655 Uiso 1 1 calc R . . 
H19C H 0.3234 0.9964 0.4136 0.655 Uiso 1 1 calc R . . 
C20 C 0.3945(15) 0.8998(12) 0.3767(11) 0.168(8) Uiso 1 1 d D . . 
H20A H 0.4490 0.8695 0.4145 0.201 Uiso 1 1 calc R . . 
C21 C 0.4127(15) 0.9714(13) 0.3087(11) 0.211(10) Uiso 1 1 d D . . 
H21A H 0.4617 0.9471 0.2818 0.317 Uiso 1 1 calc R . . 
H21B H 0.4328 1.0130 0.3250 0.317 Uiso 1 1 calc R . . 
H21C H 0.3551 0.9998 0.2759 0.317 Uiso 1 1 calc R . . 
C22 C 0.4470(11) 0.7799(12) 0.2050(8) 0.104(5) Uani 1 1 d . . . 
H22A H 0.3847 0.7673 0.2032 0.125 Uiso 1 1 calc R . . 
C23 C 0.5204(13) 0.7179(12) 0.1758(8) 0.152(7) Uani 1 1 d . . . 
H23A H 0.5212 0.6588 0.2049 0.227 Uiso 1 1 calc R . . 
H23B H 0.5826 0.7269 0.1808 0.227 Uiso 1 1 calc R . . 
H23C H 0.5033 0.7295 0.1235 0.227 Uiso 1 1 calc R . . 
C24 C 0.4365(14) 0.8758(13) 0.1612(9) 0.170(9) Uani 1 1 d . . . 
H24A H 0.3869 0.9101 0.1806 0.255 Uiso 1 1 calc R . . 
H24B H 0.4205 0.8880 0.1086 0.255 Uiso 1 1 calc R . . 
H24C H 0.4956 0.8900 0.1668 0.255 Uiso 1 1 calc R . . 
C25 C -0.2325(9) 0.7064(8) 0.9440(7) 0.071(4) Uani 1 1 d . . . 
C26 C -0.2730(10) 0.7711(9) 1.0485(7) 0.072(4) Uani 1 1 d . . . 
C27 C -0.171(2) 0.5961(12) 1.1519(10) 0.130(8) Uani 1 1 d . . . 
H27A H -0.1652 0.6162 1.1942 0.156 Uiso 1 1 calc R . . 
C28 C -0.2536(17) 0.5863(10) 1.1252(12) 0.130(7) Uani 1 1 d . . . 
H28A H -0.3162 0.5997 1.1447 0.157 Uiso 1 1 calc R . . 
C29 C -0.2348(16) 0.5559(9) 1.0637(10) 0.107(5) Uani 1 1 d . . . 
H29A H -0.2798 0.5417 1.0346 0.128 Uiso 1 1 calc R . . 
C30 C -0.1372(15) 0.5460(8) 1.0568(10) 0.106(6) Uani 1 1 d . . . 
H30A H -0.1008 0.5233 1.0206 0.127 Uiso 1 1 calc R . . 
C31 C -0.0984(15) 0.5683(10) 1.1132(12) 0.116(7) Uani 1 1 d . . . 
H31A H -0.0310 0.5649 1.1226 0.139 Uiso 1 1 calc R . . 
C32 C 0.4448(11) 0.8000(10) 0.6756(8) 0.092(5) Uani 1 1 d . . . 
C33 C 0.2922(11) 0.7470(10) 0.6603(9) 0.098(5) Uani 1 1 d . . . 
C34 C 0.4090(11) 0.5748(9) 0.7245(10) 0.094(5) Uani 1 1 d . . . 
H34A H 0.3548 0.5486 0.7356 0.113 Uiso 1 1 calc R . . 
C35 C 0.4374(13) 0.6118(9) 0.6539(8) 0.092(5) Uani 1 1 d . . . 
H35A H 0.4060 0.6169 0.6061 0.111 Uiso 1 1 calc R . . 
C36 C 0.5186(12) 0.6391(9) 0.6605(8) 0.090(5) Uani 1 1 d . . . 
H36A H 0.5545 0.6663 0.6188 0.108 Uiso 1 1 calc R . . 
C37 C 0.5398(10) 0.6211(10) 0.7381(10) 0.103(5) Uani 1 1 d . . . 
H37A H 0.5941 0.6321 0.7604 0.123 Uiso 1 1 calc R . . 
C38 C 0.4730(12) 0.5781(8) 0.7783(8) 0.088(5) Uani 1 1 d . . . 
H38A H 0.4716 0.5547 0.8335 0.106 Uiso 1 1 calc R . . 
C39 C 0.7865(12) 0.7398(12) 0.6923(8) 0.110(6) Uani 1 1 d . . . 
C40 C 0.9263(14) 0.8063(12) 0.6458(10) 0.135(8) Uani 1 1 d . . . 
C41 C 0.9787(14) 0.5863(10) 0.6710(8) 0.103(5) Uani 1 1 d . . . 
H41A H 0.9783 0.5665 0.6279 0.124 Uiso 1 1 calc R . . 
C42 C 1.0411(11) 0.6357(11) 0.6812(9) 0.102(5) Uani 1 1 d . . . 
H42A H 1.0914 0.6528 0.6489 0.122 Uiso 1 1 calc R . . 
C43 C 1.0203(12) 0.6492(11) 0.7495(9) 0.111(6) Uani 1 1 d . . . 
H43A H 1.0517 0.6808 0.7726 0.133 Uiso 1 1 calc R . . 
C44 C 0.9451(13) 0.6125(9) 0.7780(8) 0.100(5) Uani 1 1 d . . . 
H44A H 0.9154 0.6136 0.8247 0.120 Uiso 1 1 calc R . . 
C45 C 0.9176(11) 0.5728(9) 0.7263(10) 0.100(5) Uani 1 1 d . . . 
H45A H 0.8691 0.5400 0.7323 0.120 Uiso 1 1 calc R . . 
C46 C 0.2261(9) 0.7688(9) 0.2883(7) 0.065(3) Uani 1 1 d . . . 
C47 C 0.2649(8) 0.7046(8) 0.4330(7) 0.067(3) Uani 1 1 d . . . 
C48 C 0.2579(14) 0.5853(10) 0.3207(14) 0.107(6) Uani 1 1 d . . . 
H48A H 0.1959 0.5953 0.2943 0.128 Uiso 1 1 calc R . . 
C49 C 0.3405(19) 0.5997(10) 0.2872(10) 0.107(6) Uani 1 1 d . . . 
H49A H 0.3475 0.6210 0.2326 0.128 Uiso 1 1 calc R . . 
C50 C 0.4141(13) 0.5732(10) 0.3448(14) 0.111(6) Uani 1 1 d . . . 
H50A H 0.4814 0.5722 0.3381 0.133 Uiso 1 1 calc R . . 
C51 C 0.3728(16) 0.5477(8) 0.4129(10) 0.095(5) Uani 1 1 d . . . 
H51A H 0.4066 0.5248 0.4634 0.114 Uiso 1 1 calc R . . 
C52 C 0.2786(17) 0.5551(10) 0.3980(13) 0.111(5) Uani 1 1 d . . . 
H52A H 0.2336 0.5390 0.4361 0.133 Uiso 1 1 calc R . . 
  
loop_ 
 _atom_site_aniso_label 
 _atom_site_aniso_U_11 
 _atom_site_aniso_U_22 
 _atom_site_aniso_U_33 
 _atom_site_aniso_U_23 
 _atom_site_aniso_U_13 
 _atom_site_aniso_U_12 
I1 0.1436(10) 0.0905(8) 0.0634(6) -0.0073(5) -0.0215(6) -0.0061(7) 
I2 0.1283(9) 0.1457(10) 0.1267(9) -0.1015(8) 0.0441(7) -0.0692(8) 
I3 0.1271(9) 0.1317(9) 0.0606(6) -0.0102(6) 0.0001(6) -0.0721(7) 
I4 0.1482(10) 0.0911(8) 0.0890(7) -0.0473(6) 0.0131(7) -0.0120(7) 
Fe1 0.0769(12) 0.0476(11) 0.0533(10) -0.0166(8) 0.0076(9) -0.0199(9) 
Fe2 0.0664(11) 0.0603(12) 0.0481(10) -0.0201(8) 0.0119(8) -0.0089(9) 
Fe4 0.0687(11) 0.0539(11) 0.0567(10) -0.0215(9) -0.0033(9) -0.0110(9) 
Fe3 0.0714(12) 0.0860(14) 0.0497(10) -0.0242(9) -0.0118(9) -0.0131(10) 
Hg1 0.0678(3) 0.0724(4) 0.0589(3) -0.0255(3) -0.0012(2) -0.0166(3) 
Hg2 0.0700(4) 0.0798(4) 0.0622(3) -0.0274(3) 0.0101(3) -0.0251(3) 
Se1 0.0539(8) 0.1253(13) 0.0849(10) -0.0745(9) -0.0025(7) -0.0008(8) 
Se2 0.1134(11) 0.0803(10) 0.0672(8) -0.0400(7) 0.0409(8) -0.0518(8) 
Se3 0.0901(10) 0.0779(10) 0.0543(8) -0.0182(7) -0.0115(7) -0.0347(8) 
Se4 0.0564(8) 0.1624(15) 0.0459(7) -0.0290(8) 0.0000(6) -0.0216(9) 
P1 0.0509(18) 0.050(2) 0.0516(18) -0.0236(16) -0.0007(15) -0.0072(15) 
P2 0.057(2) 0.059(2) 0.0561(19) -0.0265(16) 0.0111(16) -0.0184(16) 
P3 0.057(2) 0.079(3) 0.0461(18) -0.0229(17) 0.0046(16) -0.0249(18) 
P4 0.0525(19) 0.072(2) 0.0476(18) -0.0231(16) -0.0024(15) -0.0128(17) 
O1 0.068(5) 0.113(7) 0.072(6) -0.063(5) -0.001(4) -0.011(5) 
O2 0.061(5) 0.054(6) 0.091(6) -0.008(5) 0.014(5) -0.013(4) 
O3 0.074(6) 0.157(9) 0.099(7) -0.079(7) 0.018(5) -0.042(6) 
O4 0.136(8) 0.052(6) 0.095(6) -0.030(5) 0.068(6) -0.026(5) 
O5 0.094(7) 0.176(10) 0.066(6) -0.069(6) 0.022(5) -0.061(6) 
O6 0.122(7) 0.056(6) 0.081(6) -0.013(5) -0.039(6) -0.018(5) 
O7 0.083(6) 0.057(6) 0.101(6) -0.039(5) -0.026(5) -0.010(5) 
O8 0.065(5) 0.144(8) 0.036(5) -0.030(5) -0.003(4) -0.026(5) 
O9 0.118(8) 0.138(9) 0.068(6) -0.038(6) -0.012(6) -0.036(7) 
O10 0.084(7) 0.106(9) 0.132(9) -0.059(7) 0.040(6) -0.006(6) 
O11 0.161(11) 0.081(9) 0.183(12) -0.026(8) 0.065(9) -0.046(8) 
O12 0.113(10) 0.230(15) 0.110(9) -0.083(9) -0.038(8) 0.025(10) 
O13 0.100(9) 0.273(16) 0.087(8) -0.063(9) 0.005(7) 0.024(10) 
O14 0.222(15) 0.153(13) 0.191(14) -0.060(11) -0.062(11) -0.085(12) 
O15 0.086(7) 0.081(7) 0.083(7) -0.005(5) -0.030(5) -0.003(5) 
O16 0.111(8) 0.135(9) 0.081(7) -0.051(7) 0.034(6) -0.026(6) 
C1 0.074(9) 0.135(14) 0.057(8) -0.055(9) 0.000(7) -0.013(9) 
C2 0.148(16) 0.190(19) 0.096(12) -0.079(13) -0.023(12) -0.017(13) 
C3 0.184(18) 0.113(14) 0.163(16) -0.106(13) 0.078(13) -0.079(13) 
C4 0.113(13) 0.083(12) 0.096(12) 0.001(10) 0.001(10) -0.032(10) 
C5 0.33(3) 0.33(4) 0.104(17) 0.079(19) -0.08(2) -0.21(3) 
C6 0.50(5) 0.14(2) 0.22(2) -0.049(18) 0.10(3) -0.23(3) 
C9 0.35(4) 0.30(4) 0.28(3) -0.23(3) 0.25(3) -0.21(3) 
C13 0.064(10) 0.23(2) 0.080(11) -0.075(13) 0.017(8) -0.057(12) 
C14 0.17(2) 0.23(3) 0.18(2) -0.13(2) 0.034(16) -0.026(19) 
C15 0.124(15) 0.26(2) 0.127(15) -0.034(15) 0.077(12) -0.104(16) 
C16 0.122(14) 0.094(13) 0.077(11) -0.014(9) -0.025(10) -0.010(11) 
C17 0.25(3) 0.125(17) 0.098(14) 0.003(12) 0.056(15) -0.018(17) 
C18 0.131(17) 0.107(15) 0.26(3) -0.090(16) -0.029(17) -0.029(12) 
C22 0.094(12) 0.163(17) 0.067(11) -0.043(11) 0.006(9) -0.048(11) 
C23 0.173(18) 0.21(2) 0.091(12) -0.084(14) 0.036(12) -0.041(16) 
C24 0.20(2) 0.22(2) 0.083(13) -0.022(14) -0.024(13) -0.101(19) 
C25 0.084(10) 0.078(10) 0.066(9) -0.034(8) 0.013(8) -0.034(7) 
C26 0.075(10) 0.086(11) 0.056(8) -0.025(8) 0.005(7) -0.025(8) 
C27 0.24(3) 0.090(15) 0.060(11) -0.009(10) -0.002(15) -0.070(17) 
C28 0.22(3) 0.077(12) 0.104(15) -0.021(11) 0.082(16) -0.079(14) 
C29 0.164(19) 0.055(10) 0.110(14) -0.020(9) 0.030(13) -0.057(11) 
C30 0.128(16) 0.029(9) 0.131(16) 0.001(9) 0.024(13) -0.008(9) 
C31 0.17(2) 0.053(11) 0.099(14) -0.002(10) -0.049(15) -0.008(11) 
C32 0.111(13) 0.074(12) 0.084(10) -0.029(9) 0.042(9) -0.011(10) 
C33 0.075(11) 0.117(13) 0.096(12) -0.049(10) -0.003(9) 0.005(10) 
C34 0.121(13) 0.077(11) 0.102(12) -0.053(10) 0.031(11) -0.025(9) 
C35 0.135(15) 0.093(12) 0.058(10) -0.039(8) 0.026(10) -0.029(10) 
C36 0.111(13) 0.073(11) 0.074(11) -0.025(8) 0.048(10) -0.005(9) 
C37 0.079(11) 0.123(14) 0.099(13) -0.045(11) 0.012(10) -0.004(10) 
C38 0.129(14) 0.044(9) 0.063(9) -0.008(7) 0.013(10) 0.014(8) 
C39 0.094(13) 0.175(17) 0.052(9) -0.041(10) -0.006(9) -0.014(12) 
C40 0.179(18) 0.096(14) 0.132(15) -0.020(12) -0.081(13) -0.064(13) 
C41 0.149(16) 0.095(13) 0.047(9) -0.016(8) -0.024(10) -0.009(11) 
C42 0.085(11) 0.139(15) 0.082(12) -0.044(10) -0.014(9) -0.023(10) 
C43 0.122(14) 0.151(16) 0.076(11) -0.045(11) -0.040(10) -0.054(12) 
C44 0.132(15) 0.080(11) 0.073(10) -0.026(9) -0.019(10) 0.000(10) 
C45 0.115(13) 0.086(12) 0.100(13) -0.027(10) -0.031(11) -0.033(10) 
C46 0.082(10) 0.074(10) 0.053(8) -0.026(7) 0.005(7) -0.038(8) 
C47 0.053(8) 0.067(9) 0.065(8) -0.015(7) 0.001(7) 0.003(6) 
C48 0.132(17) 0.070(11) 0.139(17) -0.047(12) -0.036(15) -0.044(10) 
C49 0.178(19) 0.080(12) 0.091(13) -0.061(10) 0.014(15) -0.038(14) 
C50 0.101(14) 0.084(12) 0.147(17) -0.060(12) 0.032(15) 0.003(10) 
C51 0.117(15) 0.051(10) 0.096(13) -0.014(8) -0.024(12) 0.003(9) 
C52 0.15(2) 0.071(12) 0.133(19) -0.045(11) 0.009(14) -0.044(11) 
  
_geom_special_details 
; 
 All esds (except the esd in the dihedral angle between two l.s. planes) 
 are estimated using the full covariance matrix.  The cell esds are taken 
 into account individually in the estimation of esds in distances, angles 
 and torsion angles; correlations between esds in cell parameters are only 
 used when they are defined by crystal symmetry.  An approximate (isotropic) 
 treatment of cell esds is used for estimating esds involving l.s. planes. 
; 
  
loop_ 
 _geom_bond_atom_site_label_1 
 _geom_bond_atom_site_label_2 
 _geom_bond_distance 
 _geom_bond_site_symmetry_2 
 _geom_bond_publ_flag 
I1 Hg1 2.7776(10) . ? 
I2 Hg1 2.7094(11) . ? 
I3 Hg2 2.7044(10) . ? 
I4 Hg2 2.7785(11) . ? 
Fe1 C25 1.716(13) . ? 
Fe1 C26 1.785(15) . ? 
Fe1 C30 2.051(13) . ? 
Fe1 C27 2.075(16) . ? 
Fe1 C31 2.092(15) . ? 
Fe1 C29 2.095(13) . ? 
Fe1 C28 2.102(14) . ? 
Fe1 P1 2.196(3) . ? 
Fe2 C33 1.726(15) . ? 
Fe2 C32 1.760(16) . ? 
Fe2 C37 2.068(14) . ? 
Fe2 C34 2.086(13) . ? 
Fe2 C35 2.086(13) . ? 
Fe2 C38 2.096(12) . ? 
Fe2 C36 2.105(13) . ? 
Fe2 P2 2.198(3) . ? 
Fe4 C47 1.756(13) . ? 
Fe4 C46 1.782(14) . ? 
Fe4 C51 2.057(13) . ? 
Fe4 C52 2.068(15) . ? 
Fe4 C49 2.082(13) . ? 
Fe4 C50 2.098(13) . ? 
Fe4 C48 2.117(13) . ? 
Fe4 P4 2.199(3) . ? 
Fe3 C39 1.713(17) . ? 
Fe3 C40 1.752(17) . ? 
Fe3 C41 2.041(15) . ? 
Fe3 C42 2.057(15) . ? 
Fe3 C45 2.068(14) . ? 
Fe3 C44 2.079(13) . ? 
Fe3 C43 2.098(14) . ? 
Fe3 P3 2.199(3) . ? 
Hg1 Se1 2.6449(13) . ? 
Hg1 Se2 2.7681(13) . ? 
Hg2 Se4 2.6394(14) . ? 
Hg2 Se3 2.7675(12) . ? 
Se1 P1 2.176(3) . ? 
Se2 P2 2.161(3) . ? 
Se3 P3 2.168(3) . ? 
Se4 P4 2.172(3) . ? 
P1 O1 1.563(8) . ? 
P1 O2 1.581(8) . ? 
P2 O4 1.559(8) . ? 
P2 O3 1.569(8) . ? 
P3 O5 1.575(9) . ? 
P3 O6 1.607(8) . ? 
P4 O7 1.542(8) . ? 
P4 O8 1.585(8) . ? 
O1 C1 1.471(12) . ? 
O2 C4 1.446(15) . ? 
O3 C9 1.60(2) . ? 
O4 C10 1.578(14) . ? 
O5 C13 1.443(15) . ? 
O6 C16 1.415(14) . ? 
O7 C20 1.51(2) . ? 
O8 C22 1.418(14) . ? 
O9 C25 1.148(12) . ? 
O10 C26 1.124(13) . ? 
O11 C32 1.137(15) . ? 
O12 C33 1.132(14) . ? 
O13 C39 1.169(16) . ? 
O14 C40 1.149(16) . ? 
O15 C46 1.139(12) . ? 
O16 C47 1.151(13) . ? 
C1 C3 1.461(17) . ? 
C1 C2 1.544(16) . ? 
C1 H1A 0.9800 . ? 
C2 H2A 0.9600 . ? 
C2 H2B 0.9600 . ? 
C2 H2C 0.9600 . ? 
C3 H3A 0.9600 . ? 
C3 H3B 0.9600 . ? 
C3 H3C 0.9600 . ? 
C4 C5 1.39(2) . ? 
C4 C6 1.49(2) . ? 
C4 H4A 0.9800 . ? 
C5 H5A 0.9600 . ? 
C5 H5B 0.9600 . ? 
C5 H5C 0.9600 . ? 
C6 H6A 0.9600 . ? 
C6 H6B 0.9600 . ? 
C6 H6C 0.9600 . ? 
C7 C9 1.46(3) . ? 
C7 H7A 0.9600 . ? 
C7 H7B 0.9600 . ? 
C7 H7C 0.9600 . ? 
C8 C9 1.43(3) . ? 
C8 H8A 0.9600 . ? 
C8 H8B 0.9600 . ? 
C8 H8C 0.9600 . ? 
C9 H9A 0.9800 . ? 
C10 C11 1.40(3) . ? 
C10 C12 1.42(2) . ? 
C10 H10A 0.9800 . ? 
C11 H11A 0.9600 . ? 
C11 H11B 0.9600 . ? 
C11 H11C 0.9600 . ? 
C12 H12A 0.9600 . ? 
C12 H12B 0.9600 . ? 
C12 H12C 0.9600 . ? 
C13 C14 1.48(2) . ? 
C13 C15 1.56(2) . ? 
C13 H13A 0.9800 . ? 
C14 H14A 0.9600 . ? 
C14 H14B 0.9600 . ? 
C14 H14C 0.9600 . ? 
C15 H15A 0.9600 . ? 
C15 H15B 0.9600 . ? 
C15 H15C 0.9600 . ? 
C16 C18 1.46(2) . ? 
C16 C17 1.51(2) . ? 
C16 H16A 0.9800 . ? 
C17 H17A 0.9600 . ? 
C17 H17B 0.9600 . ? 
C17 H17C 0.9600 . ? 
C18 H18A 0.9600 . ? 
C18 H18B 0.9600 . ? 
C18 H18C 0.9600 . ? 
C19 C20 1.505(18) . ? 
C19 H19A 0.9600 . ? 
C19 H19B 0.9600 . ? 
C19 H19C 0.9600 . ? 
C20 C21 1.507(16) . ? 
C20 H20A 0.9800 . ? 
C21 H21A 0.9600 . ? 
C21 H21B 0.9600 . ? 
C21 H21C 0.9600 . ? 
C22 C24 1.52(2) . ? 
C22 C23 1.539(19) . ? 
C22 H22A 0.9800 . ? 
C23 H23A 0.9600 . ? 
C23 H23B 0.9600 . ? 
C23 H23C 0.9600 . ? 
C24 H24A 0.9600 . ? 
C24 H24B 0.9600 . ? 
C24 H24C 0.9600 . ? 
C27 C31 1.36(2) . ? 
C27 C28 1.37(2) . ? 
C27 H27A 0.9800 . ? 
C28 C29 1.42(2) . ? 
C28 H28A 0.9800 . ? 
C29 C30 1.394(19) . ? 
C29 H29A 0.9800 . ? 
C30 C31 1.41(2) . ? 
C30 H30A 0.9800 . ? 
C31 H31A 0.9800 . ? 
C34 C35 1.371(17) . ? 
C34 C38 1.407(18) . ? 
C34 H34A 0.9800 . ? 
C35 C36 1.388(19) . ? 
C35 H35A 0.9800 . ? 
C36 C37 1.411(18) . ? 
C36 H36A 0.9800 . ? 
C37 C38 1.413(18) . ? 
C37 H37A 0.9800 . ? 
C38 H38A 0.9800 . ? 
C41 C45 1.357(19) . ? 
C41 C42 1.426(19) . ? 
C41 H41A 0.9800 . ? 
C42 C43 1.401(18) . ? 
C42 H42A 0.9800 . ? 
C43 C44 1.397(19) . ? 
C43 H43A 0.9800 . ? 
C44 C45 1.465(18) . ? 
C44 H44A 0.9800 . ? 
C45 H45A 0.9800 . ? 
C48 C52 1.379(19) . ? 
C48 C49 1.38(2) . ? 
C48 H48A 0.9800 . ? 
C49 C50 1.41(2) . ? 
C49 H49A 0.9800 . ? 
C50 C51 1.388(19) . ? 
C50 H50A 0.9800 . ? 
C51 C52 1.365(19) . ? 
C51 H51A 0.9800 . ? 
C52 H52A 0.9800 . ? 
  
loop_ 
 _geom_angle_atom_site_label_1 
 _geom_angle_atom_site_label_2 
 _geom_angle_atom_site_label_3 
 _geom_angle 
 _geom_angle_site_symmetry_1 
 _geom_angle_site_symmetry_3 
 _geom_angle_publ_flag 
C25 Fe1 C26 93.8(6) . . ? 
C25 Fe1 C30 97.7(7) . . ? 
C26 Fe1 C30 161.2(6) . . ? 
C25 Fe1 C27 158.9(7) . . ? 
C26 Fe1 C27 99.6(8) . . ? 
C30 Fe1 C27 65.5(7) . . ? 
C25 Fe1 C31 133.2(8) . . ? 
C26 Fe1 C31 132.7(8) . . ? 
C30 Fe1 C31 39.7(6) . . ? 
C27 Fe1 C31 38.0(7) . . ? 
C25 Fe1 C29 92.9(6) . . ? 
C26 Fe1 C29 125.5(8) . . ? 
C30 Fe1 C29 39.3(5) . . ? 
C27 Fe1 C29 66.1(7) . . ? 
C31 Fe1 C29 66.0(7) . . ? 
C25 Fe1 C28 124.4(9) . . ? 
C26 Fe1 C28 96.3(7) . . ? 
C30 Fe1 C28 64.9(7) . . ? 
C27 Fe1 C28 38.2(7) . . ? 
C31 Fe1 C28 63.8(8) . . ? 
C29 Fe1 C28 39.5(6) . . ? 
C25 Fe1 P1 86.9(4) . . ? 
C26 Fe1 P1 89.7(4) . . ? 
C30 Fe1 P1 105.7(6) . . ? 
C27 Fe1 P1 109.2(8) . . ? 
C31 Fe1 P1 88.8(6) . . ? 
C29 Fe1 P1 144.6(6) . . ? 
C28 Fe1 P1 147.4(8) . . ? 
C33 Fe2 C32 98.2(7) . . ? 
C33 Fe2 C37 157.2(6) . . ? 
C32 Fe2 C37 95.0(7) . . ? 
C33 Fe2 C34 95.7(7) . . ? 
C32 Fe2 C34 156.5(6) . . ? 
C37 Fe2 C34 66.3(6) . . ? 
C33 Fe2 C35 91.4(7) . . ? 
C32 Fe2 C35 122.2(7) . . ? 
C37 Fe2 C35 65.8(6) . . ? 
C34 Fe2 C35 38.4(5) . . ? 
C33 Fe2 C38 131.0(8) . . ? 
C32 Fe2 C38 130.8(8) . . ? 
C37 Fe2 C38 39.7(5) . . ? 
C34 Fe2 C38 39.3(5) . . ? 
C35 Fe2 C38 65.1(5) . . ? 
C33 Fe2 C36 121.3(7) . . ? 
C32 Fe2 C36 91.5(6) . . ? 
C37 Fe2 C36 39.5(5) . . ? 
C34 Fe2 C36 65.1(6) . . ? 
C35 Fe2 C36 38.7(5) . . ? 
C38 Fe2 C36 65.6(5) . . ? 
C33 Fe2 P2 90.5(5) . . ? 
C32 Fe2 P2 90.3(4) . . ? 
C37 Fe2 P2 108.0(5) . . ? 
C34 Fe2 P2 108.5(4) . . ? 
C35 Fe2 P2 146.8(5) . . ? 
C38 Fe2 P2 89.1(4) . . ? 
C36 Fe2 P2 147.5(5) . . ? 
C47 Fe4 C46 93.5(5) . . ? 
C47 Fe4 C51 97.6(6) . . ? 
C46 Fe4 C51 159.1(6) . . ? 
C47 Fe4 C52 93.0(7) . . ? 
C46 Fe4 C52 123.3(8) . . ? 
C51 Fe4 C52 38.6(5) . . ? 
C47 Fe4 C49 157.9(7) . . ? 
C46 Fe4 C49 98.8(7) . . ? 
C51 Fe4 C49 65.5(6) . . ? 
C52 Fe4 C49 64.9(7) . . ? 
C47 Fe4 C50 132.6(8) . . ? 
C46 Fe4 C50 133.9(8) . . ? 
C51 Fe4 C50 39.0(5) . . ? 
C52 Fe4 C50 64.9(7) . . ? 
C49 Fe4 C50 39.3(6) . . ? 
C47 Fe4 C48 122.6(8) . . ? 
C46 Fe4 C48 94.3(6) . . ? 
C51 Fe4 C48 64.7(6) . . ? 
C52 Fe4 C48 38.5(5) . . ? 
C49 Fe4 C48 38.5(6) . . ? 
C50 Fe4 C48 64.9(7) . . ? 
C47 Fe4 P4 87.2(4) . . ? 
C46 Fe4 P4 91.7(4) . . ? 
C51 Fe4 P4 106.4(6) . . ? 
C52 Fe4 P4 144.8(7) . . ? 
C49 Fe4 P4 110.6(7) . . ? 
C50 Fe4 P4 89.4(5) . . ? 
C48 Fe4 P4 149.0(7) . . ? 
C39 Fe3 C40 95.2(9) . . ? 
C39 Fe3 C41 132.4(9) . . ? 
C40 Fe3 C41 132.4(10) . . ? 
C39 Fe3 C42 161.1(6) . . ? 
C40 Fe3 C42 94.8(8) . . ? 
C41 Fe3 C42 40.7(6) . . ? 
C39 Fe3 C45 97.8(8) . . ? 
C40 Fe3 C45 158.0(6) . . ? 
C41 Fe3 C45 38.6(5) . . ? 
C42 Fe3 C45 68.2(6) . . ? 
C39 Fe3 C44 94.6(7) . . ? 
C40 Fe3 C44 120.0(7) . . ? 
C41 Fe3 C44 65.6(5) . . ? 
C42 Fe3 C44 66.5(6) . . ? 
C45 Fe3 C44 41.4(5) . . ? 
C39 Fe3 C43 124.6(7) . . ? 
C40 Fe3 C43 90.1(7) . . ? 
C41 Fe3 C43 66.0(6) . . ? 
C42 Fe3 C43 39.4(5) . . ? 
C45 Fe3 C43 67.9(6) . . ? 
C44 Fe3 C43 39.1(5) . . ? 
C39 Fe3 P3 89.2(4) . . ? 
C40 Fe3 P3 89.8(5) . . ? 
C41 Fe3 P3 89.6(4) . . ? 
C42 Fe3 P3 106.8(5) . . ? 
C45 Fe3 P3 108.0(5) . . ? 
C44 Fe3 P3 149.3(5) . . ? 
C43 Fe3 P3 146.0(5) . . ? 
Se1 Hg1 I2 125.75(4) . . ? 
Se1 Hg1 Se2 86.71(4) . . ? 
I2 Hg1 Se2 120.69(4) . . ? 
Se1 Hg1 I1 106.43(5) . . ? 
I2 Hg1 I1 108.87(4) . . ? 
Se2 Hg1 I1 105.38(4) . . ? 
Se4 Hg2 I3 123.77(5) . . ? 
Se4 Hg2 Se3 88.45(4) . . ? 
I3 Hg2 Se3 120.78(4) . . ? 
Se4 Hg2 I4 108.00(5) . . ? 
I3 Hg2 I4 109.37(4) . . ? 
Se3 Hg2 I4 103.55(4) . . ? 
P1 Se1 Hg1 104.90(9) . . ? 
P2 Se2 Hg1 119.40(9) . . ? 
P3 Se3 Hg2 118.69(9) . . ? 
P4 Se4 Hg2 106.06(9) . . ? 
O1 P1 O2 107.3(5) . . ? 
O1 P1 Se1 103.2(3) . . ? 
O2 P1 Se1 108.8(3) . . ? 
O1 P1 Fe1 117.1(4) . . ? 
O2 P1 Fe1 106.2(3) . . ? 
Se1 P1 Fe1 113.82(14) . . ? 
O4 P2 O3 106.0(5) . . ? 
O4 P2 Se2 111.1(3) . . ? 
O3 P2 Se2 111.0(4) . . ? 
O4 P2 Fe2 108.0(3) . . ? 
O3 P2 Fe2 105.5(3) . . ? 
Se2 P2 Fe2 114.66(14) . . ? 
O5 P3 O6 105.3(5) . . ? 
O5 P3 Se3 112.8(4) . . ? 
O6 P3 Se3 111.7(3) . . ? 
O5 P3 Fe3 106.2(3) . . ? 
O6 P3 Fe3 105.8(3) . . ? 
Se3 P3 Fe3 114.41(15) . . ? 
O7 P4 O8 107.8(5) . . ? 
O7 P4 Se4 110.1(3) . . ? 
O8 P4 Se4 103.2(3) . . ? 
O7 P4 Fe4 105.5(3) . . ? 
O8 P4 Fe4 116.3(3) . . ? 
Se4 P4 Fe4 113.83(15) . . ? 
C1 O1 P1 126.1(7) . . ? 
C4 O2 P1 126.9(8) . . ? 
P2 O3 C9 133.4(11) . . ? 
P2 O4 C10 130.4(10) . . ? 
C13 O5 P3 127.5(8) . . ? 
C16 O6 P3 126.7(9) . . ? 
C20 O7 P4 123.8(9) . . ? 
C22 O8 P4 126.4(8) . . ? 
C3 C1 O1 111.5(12) . . ? 
C3 C1 C2 111.6(12) . . ? 
O1 C1 C2 104.0(10) . . ? 
C3 C1 H1A 109.9 . . ? 
O1 C1 H1A 109.9 . . ? 
C2 C1 H1A 109.9 . . ? 
C1 C2 H2A 109.5 . . ? 
C1 C2 H2B 109.5 . . ? 
H2A C2 H2B 109.5 . . ? 
C1 C2 H2C 109.5 . . ? 
H2A C2 H2C 109.5 . . ? 
H2B C2 H2C 109.5 . . ? 
C1 C3 H3A 109.5 . . ? 
C1 C3 H3B 109.5 . . ? 
H3A C3 H3B 109.5 . . ? 
C1 C3 H3C 109.5 . . ? 
H3A C3 H3C 109.5 . . ? 
H3B C3 H3C 109.5 . . ? 
C5 C4 O2 110.7(14) . . ? 
C5 C4 C6 112.1(17) . . ? 
O2 C4 C6 108.2(14) . . ? 
C5 C4 H4A 108.6 . . ? 
O2 C4 H4A 108.6 . . ? 
C6 C4 H4A 108.6 . . ? 
C4 C5 H5A 109.5 . . ? 
C4 C5 H5B 109.5 . . ? 
H5A C5 H5B 109.5 . . ? 
C4 C5 H5C 109.5 . . ? 
H5A C5 H5C 109.5 . . ? 
H5B C5 H5C 109.5 . . ? 
C4 C6 H6A 109.5 . . ? 
C4 C6 H6B 109.5 . . ? 
H6A C6 H6B 109.5 . . ? 
C4 C6 H6C 109.5 . . ? 
H6A C6 H6C 109.5 . . ? 
H6B C6 H6C 109.5 . . ? 
C9 C7 H7A 109.5 . . ? 
C9 C7 H7B 109.5 . . ? 
H7A C7 H7B 109.5 . . ? 
C9 C7 H7C 109.5 . . ? 
H7A C7 H7C 109.5 . . ? 
H7B C7 H7C 109.5 . . ? 
C9 C8 H8A 109.5 . . ? 
C9 C8 H8B 109.5 . . ? 
H8A C8 H8B 109.5 . . ? 
C9 C8 H8C 109.5 . . ? 
H8A C8 H8C 109.5 . . ? 
H8B C8 H8C 109.5 . . ? 
C8 C9 C7 145(3) . . ? 
C8 C9 O3 99.6(18) . . ? 
C7 C9 O3 98(2) . . ? 
C8 C9 H9A 102.6 . . ? 
C7 C9 H9A 102.6 . . ? 
O3 C9 H9A 102.6 . . ? 
C11 C10 C12 124(2) . . ? 
C11 C10 O4 99.7(16) . . ? 
C12 C10 O4 107.4(17) . . ? 
C11 C10 H10A 108.2 . . ? 
C12 C10 H10A 108.2 . . ? 
O4 C10 H10A 108.2 . . ? 
C10 C11 H11A 109.5 . . ? 
C10 C11 H11B 109.5 . . ? 
H11A C11 H11B 109.5 . . ? 
C10 C11 H11C 109.5 . . ? 
H11A C11 H11C 109.5 . . ? 
H11B C11 H11C 109.5 . . ? 
C10 C12 H12A 109.5 . . ? 
C10 C12 H12B 109.5 . . ? 
H12A C12 H12B 109.5 . . ? 
C10 C12 H12C 109.5 . . ? 
H12A C12 H12C 109.5 . . ? 
H12B C12 H12C 109.5 . . ? 
O5 C13 C14 109.1(15) . . ? 
O5 C13 C15 107.0(14) . . ? 
C14 C13 C15 113.4(14) . . ? 
O5 C13 H13A 109.1 . . ? 
C14 C13 H13A 109.1 . . ? 
C15 C13 H13A 109.1 . . ? 
C13 C14 H14A 109.5 . . ? 
C13 C14 H14B 109.5 . . ? 
H14A C14 H14B 109.5 . . ? 
C13 C14 H14C 109.5 . . ? 
H14A C14 H14C 109.5 . . ? 
H14B C14 H14C 109.5 . . ? 
C13 C15 H15A 109.5 . . ? 
C13 C15 H15B 109.5 . . ? 
H15A C15 H15B 109.5 . . ? 
C13 C15 H15C 109.5 . . ? 
H15A C15 H15C 109.5 . . ? 
H15B C15 H15C 109.5 . . ? 
O6 C16 C18 107.8(14) . . ? 
O6 C16 C17 102.8(14) . . ? 
C18 C16 C17 112.7(15) . . ? 
O6 C16 H16A 111.0 . . ? 
C18 C16 H16A 111.0 . . ? 
C17 C16 H16A 111.0 . . ? 
C16 C17 H17A 109.5 . . ? 
C16 C17 H17B 109.5 . . ? 
H17A C17 H17B 109.5 . . ? 
C16 C17 H17C 109.5 . . ? 
H17A C17 H17C 109.5 . . ? 
H17B C17 H17C 109.5 . . ? 
C16 C18 H18A 109.5 . . ? 
C16 C18 H18B 109.5 . . ? 
H18A C18 H18B 109.5 . . ? 
C16 C18 H18C 109.5 . . ? 
H18A C18 H18C 109.5 . . ? 
H18B C18 H18C 109.5 . . ? 
C20 C19 H19A 109.5 . . ? 
C20 C19 H19B 109.5 . . ? 
H19A C19 H19B 109.5 . . ? 
C20 C19 H19C 109.5 . . ? 
H19A C19 H19C 109.5 . . ? 
H19B C19 H19C 109.5 . . ? 
C19 C20 C21 101.4(14) . . ? 
C19 C20 O7 104(2) . . ? 
C21 C20 O7 106.0(16) . . ? 
C19 C20 H20A 114.6 . . ? 
C21 C20 H20A 114.6 . . ? 
O7 C20 H20A 114.6 . . ? 
C20 C21 H21A 109.5 . . ? 
C20 C21 H21B 109.5 . . ? 
H21A C21 H21B 109.5 . . ? 
C20 C21 H21C 109.5 . . ? 
H21A C21 H21C 109.5 . . ? 
H21B C21 H21C 109.5 . . ? 
O8 C22 C24 109.6(13) . . ? 
O8 C22 C23 106.1(12) . . ? 
C24 C22 C23 114.3(15) . . ? 
O8 C22 H22A 108.9 . . ? 
C24 C22 H22A 108.9 . . ? 
C23 C22 H22A 108.9 . . ? 
C22 C23 H23A 109.5 . . ? 
C22 C23 H23B 109.5 . . ? 
H23A C23 H23B 109.5 . . ? 
C22 C23 H23C 109.5 . . ? 
H23A C23 H23C 109.5 . . ? 
H23B C23 H23C 109.5 . . ? 
C22 C24 H24A 109.5 . . ? 
C22 C24 H24B 109.5 . . ? 
H24A C24 H24B 109.5 . . ? 
C22 C24 H24C 109.5 . . ? 
H24A C24 H24C 109.5 . . ? 
H24B C24 H24C 109.5 . . ? 
O9 C25 Fe1 177.7(12) . . ? 
O10 C26 Fe1 176.5(13) . . ? 
C31 C27 C28 109(2) . . ? 
C31 C27 Fe1 71.6(10) . . ? 
C28 C27 Fe1 72.0(10) . . ? 
C31 C27 H27A 125.6 . . ? 
C28 C27 H27A 125.6 . . ? 
Fe1 C27 H27A 125.6 . . ? 
C27 C28 C29 110(2) . . ? 
C27 C28 Fe1 69.8(10) . . ? 
C29 C28 Fe1 70.0(8) . . ? 
C27 C28 H28A 125.2 . . ? 
C29 C28 H28A 125.2 . . ? 
Fe1 C28 H28A 125.2 . . ? 
C30 C29 C28 104.9(17) . . ? 
C30 C29 Fe1 68.7(8) . . ? 
C28 C29 Fe1 70.5(8) . . ? 
C30 C29 H29A 127.5 . . ? 
C28 C29 H29A 127.5 . . ? 
Fe1 C29 H29A 127.5 . . ? 
C29 C30 C31 109.0(18) . . ? 
C29 C30 Fe1 72.1(8) . . ? 
C31 C30 Fe1 71.7(9) . . ? 
C29 C30 H30A 125.5 . . ? 
C31 C30 H30A 125.5 . . ? 
Fe1 C30 H30A 125.5 . . ? 
C27 C31 C30 108(2) . . ? 
C27 C31 Fe1 70.3(11) . . ? 
C30 C31 Fe1 68.6(8) . . ? 
C27 C31 H31A 126.1 . . ? 
C30 C31 H31A 126.1 . . ? 
Fe1 C31 H31A 126.1 . . ? 
O11 C32 Fe2 178.3(14) . . ? 
O12 C33 Fe2 176.8(17) . . ? 
C35 C34 C38 108.2(15) . . ? 
C35 C34 Fe2 70.8(8) . . ? 
C38 C34 Fe2 70.7(8) . . ? 
C35 C34 H34A 125.9 . . ? 
C38 C34 H34A 125.9 . . ? 
Fe2 C34 H34A 125.9 . . ? 
C34 C35 C36 109.6(15) . . ? 
C34 C35 Fe2 70.8(8) . . ? 
C36 C35 Fe2 71.4(8) . . ? 
C34 C35 H35A 125.2 . . ? 
C36 C35 H35A 125.2 . . ? 
Fe2 C35 H35A 125.2 . . ? 
C35 C36 C37 107.4(13) . . ? 
C35 C36 Fe2 69.9(8) . . ? 
C37 C36 Fe2 68.8(7) . . ? 
C35 C36 H36A 126.3 . . ? 
C37 C36 H36A 126.3 . . ? 
Fe2 C36 H36A 126.3 . . ? 
C36 C37 C38 107.4(14) . . ? 
C36 C37 Fe2 71.7(8) . . ? 
C38 C37 Fe2 71.2(8) . . ? 
C36 C37 H37A 126.2 . . ? 
C38 C37 H37A 126.2 . . ? 
Fe2 C37 H37A 126.2 . . ? 
C34 C38 C37 107.3(13) . . ? 
C34 C38 Fe2 70.0(8) . . ? 
C37 C38 Fe2 69.1(8) . . ? 
C34 C38 H38A 126.4 . . ? 
C37 C38 H38A 126.4 . . ? 
Fe2 C38 H38A 126.4 . . ? 
O13 C39 Fe3 177.8(16) . . ? 
O14 C40 Fe3 178(2) . . ? 
C45 C41 C42 112.4(14) . . ? 
C45 C41 Fe3 71.8(10) . . ? 
C42 C41 Fe3 70.3(9) . . ? 
C45 C41 H41A 123.8 . . ? 
C42 C41 H41A 123.8 . . ? 
Fe3 C41 H41A 123.8 . . ? 
C43 C42 C41 105.9(15) . . ? 
C43 C42 Fe3 71.9(9) . . ? 
C41 C42 Fe3 69.0(9) . . ? 
C43 C42 H42A 127.0 . . ? 
C41 C42 H42A 127.0 . . ? 
Fe3 C42 H42A 127.0 . . ? 
C44 C43 C42 108.4(14) . . ? 
C44 C43 Fe3 69.7(8) . . ? 
C42 C43 Fe3 68.7(8) . . ? 
C44 C43 H43A 125.8 . . ? 
C42 C43 H43A 125.8 . . ? 
Fe3 C43 H43A 125.8 . . ? 
C43 C44 C45 108.9(15) . . ? 
C43 C44 Fe3 71.2(9) . . ? 
C45 C44 Fe3 68.9(8) . . ? 
C43 C44 H44A 125.6 . . ? 
C45 C44 H44A 125.6 . . ? 
Fe3 C44 H44A 125.6 . . ? 
C41 C45 C44 104.5(15) . . ? 
C41 C45 Fe3 69.7(9) . . ? 
C44 C45 Fe3 69.7(8) . . ? 
C41 C45 H45A 127.7 . . ? 
C44 C45 H45A 127.7 . . ? 
Fe3 C45 H45A 127.7 . . ? 
O15 C46 Fe4 177.9(12) . . ? 
O16 C47 Fe4 177.4(12) . . ? 
C52 C48 C49 107.3(16) . . ? 
C52 C48 Fe4 68.9(8) . . ? 
C49 C48 Fe4 69.4(8) . . ? 
C52 C48 H48A 126.3 . . ? 
C49 C48 H48A 126.3 . . ? 
Fe4 C48 H48A 126.3 . . ? 
C48 C49 C50 108.3(16) . . ? 
C48 C49 Fe4 72.1(9) . . ? 
C50 C49 Fe4 71.0(8) . . ? 
C48 C49 H49A 125.8 . . ? 
C50 C49 H49A 125.8 . . ? 
Fe4 C49 H49A 125.8 . . ? 
C51 C50 C49 106.5(16) . . ? 
C51 C50 Fe4 68.9(8) . . ? 
C49 C50 Fe4 69.7(8) . . ? 
C51 C50 H50A 126.8 . . ? 
C49 C50 H50A 126.8 . . ? 
Fe4 C50 H50A 126.8 . . ? 
C52 C51 C50 108.7(16) . . ? 
C52 C51 Fe4 71.1(8) . . ? 
C50 C51 Fe4 72.1(8) . . ? 
C52 C51 H51A 125.6 . . ? 
C50 C51 H51A 125.6 . . ? 
Fe4 C51 H51A 125.6 . . ? 
C51 C52 C48 109.1(17) . . ? 
C51 C52 Fe4 70.2(9) . . ? 
C48 C52 Fe4 72.7(9) . . ? 
C51 C52 H52A 125.4 . . ? 
C48 C52 H52A 125.4 . . ? 
Fe4 C52 H52A 125.4 . . ? 
  
_diffrn_measured_fraction_theta_max    0.992 
_diffrn_reflns_theta_full              25.00 
_diffrn_measured_fraction_theta_full   0.992 
_refine_diff_density_max    1.337 
_refine_diff_density_min   -0.835 
_refine_diff_density_rms    0.139 


#===END


data_5

 

_audit_creation_method            SHELXL-97

_chemical_name_systematic

;

 ?

;

_chemical_name_common             ?

_chemical_melting_point           ?

_chemical_formula_moiety          ?

_chemical_formula_sum

 'C26 H38 Cl4 Fe2 Hg2 O8 P2 Se2'

_chemical_formula_weight          1353.10

 

loop_

 _atom_type_symbol

 _atom_type_description

 _atom_type_scat_dispersion_real

 _atom_type_scat_dispersion_imag

 _atom_type_scat_source

 'C'  'C'   0.0033   0.0016

 'International Tables Vol C Tables 4.2.6.8 and 6.1.1.4'

 'H'  'H'   0.0000   0.0000

 'International Tables Vol C Tables 4.2.6.8 and 6.1.1.4'

 'O'  'O'   0.0106   0.0060

 'International Tables Vol C Tables 4.2.6.8 and 6.1.1.4'

 'P'  'P'   0.1023   0.0942

 'International Tables Vol C Tables 4.2.6.8 and 6.1.1.4'

 'Cl'  'Cl'   0.1484   0.1585

 'International Tables Vol C Tables 4.2.6.8 and 6.1.1.4'

 'Fe'  'Fe'   0.3463   0.8444

 'International Tables Vol C Tables 4.2.6.8 and 6.1.1.4'

 'Se'  'Se'  -0.0929   2.2259

 'International Tables Vol C Tables 4.2.6.8 and 6.1.1.4'

 'Hg'  'Hg'  -2.3894   9.2266

 'International Tables Vol C Tables 4.2.6.8 and 6.1.1.4'

 

_symmetry_cell_setting            Triclinic

_symmetry_space_group_name_H-M    P-1

 

loop_

 _symmetry_equiv_pos_as_xyz

 'x, y, z'

 '-x, -y, -z'

 

_cell_length_a                    8.486(7)

_cell_length_b                    9.616(8)

_cell_length_c                    14.280(17)

_cell_angle_alpha                 100.46(3)

_cell_angle_beta                  92.42(3)

_cell_angle_gamma                 112.928(19)

_cell_volume                      1047.2(17)

_cell_formula_units_Z             1

_cell_measurement_temperature     293(2)

_cell_measurement_reflns_used     4094

_cell_measurement_theta_min       2.35

_cell_measurement_theta_max       24.44

 

_exptl_crystal_description        block

_exptl_crystal_colour             colorless

_exptl_crystal_size_max           0.50

_exptl_crystal_size_mid           0.40

_exptl_crystal_size_min           0.20

_exptl_crystal_density_meas       ?

_exptl_crystal_density_diffrn     2.146

_exptl_crystal_density_method     'not measured'

_exptl_crystal_F_000              636

_exptl_absorpt_coefficient_mu     10.095

_exptl_absorpt_correction_type    multi-scan

_exptl_absorpt_correction_T_min   0.0811

_exptl_absorpt_correction_T_max   0.2373

_exptl_absorpt_process_details    ?

 

_exptl_special_details

;

 ?

;

 

_diffrn_ambient_temperature       293(2)

_diffrn_radiation_wavelength      0.71073

_diffrn_radiation_type            MoK\a

_diffrn_radiation_source          'fine-focus sealed tube'

_diffrn_radiation_monochromator   graphite

_diffrn_measurement_device_type   'CCD area detector'

_diffrn_measurement_method        'phi and omega scans'

_diffrn_detector_area_resol_mean  ?

_diffrn_standards_number          ?

_diffrn_standards_interval_count  ?

_diffrn_standards_interval_time   ?

_diffrn_standards_decay_%         ?

_diffrn_reflns_number             7615

_diffrn_reflns_av_R_equivalents   0.0466

_diffrn_reflns_av_sigmaI/netI     0.0625

_diffrn_reflns_limit_h_min        -9

_diffrn_reflns_limit_h_max        9

_diffrn_reflns_limit_k_min        -11

_diffrn_reflns_limit_k_max        11

_diffrn_reflns_limit_l_min        -16

_diffrn_reflns_limit_l_max        16

_diffrn_reflns_theta_min          1.46

_diffrn_reflns_theta_max          24.49

_reflns_number_total              3358

_reflns_number_gt                 2799

_reflns_threshold_expression      >2sigma(I)

 

_computing_data_collection        'Bruker SMART'

_computing_cell_refinement        'Bruker SMART'

_computing_data_reduction         'Bruker SAINT'

_computing_structure_solution     'SHELXS-97 (Sheldrick, 1990)'

_computing_structure_refinement   'SHELXL-97 (Sheldrick, 1997)'

_computing_molecular_graphics     'Bruker SHELXTL'

_computing_publication_material   'Bruker SHELXTL'

 

_refine_special_details

;

 Refinement of F^2^ against ALL reflections.  The weighted R-factor wR and

 goodness of fit S are based on F^2^, conventional R-factors R are based

 on F, with F set to zero for negative F^2^. The threshold expression of

 F^2^ > 2sigma(F^2^) is used only for calculating R-factors(gt) etc. and is

 not relevant to the choice of reflections for refinement.  R-factors based

 on F^2^ are statistically about twice as large as those based on F, and R-

 factors based on ALL data will be even larger.

;

 

_refine_ls_structure_factor_coef  Fsqd

_refine_ls_matrix_type            full

_refine_ls_weighting_scheme       calc

_refine_ls_weighting_details

 'calc w=1/[\s^2^(Fo^2^)+(0.1077P)^2^+0.0000P] where P=(Fo^2^+2Fc^2^)/3'

_atom_sites_solution_primary      direct

_atom_sites_solution_secondary    difmap

_atom_sites_solution_hydrogens    geom

_refine_ls_hydrogen_treatment     constr

_refine_ls_extinction_method      none

_refine_ls_extinction_coef        ?

_refine_ls_number_reflns          3358

_refine_ls_number_parameters      208

_refine_ls_number_restraints      0

_refine_ls_R_factor_all           0.0644

_refine_ls_R_factor_gt            0.0554

_refine_ls_wR_factor_ref          0.1522

_refine_ls_wR_factor_gt           0.1459

_refine_ls_goodness_of_fit_ref    1.016

_refine_ls_restrained_S_all       1.016

_refine_ls_shift/su_max           0.000

_refine_ls_shift/su_mean          0.000

 

loop_

 _atom_site_label

 _atom_site_type_symbol

 _atom_site_fract_x

 _atom_site_fract_y

 _atom_site_fract_z

 _atom_site_U_iso_or_equiv

 _atom_site_adp_type

 _atom_site_occupancy

 _atom_site_symmetry_multiplicity

 _atom_site_calc_flag

 _atom_site_refinement_flags

 _atom_site_disorder_assembly

 _atom_site_disorder_group

Hg1 Hg 0.38752(5) -0.00259(5) 0.37695(3) 0.0591(2) Uani 1 1 d . . .

Fe1 Fe 0.11443(15) 0.26808(14) 0.31013(8) 0.0387(3) Uani 1 1 d . . .

Se1 Se 0.54717(12) 0.21792(13) 0.30131(7) 0.0563(3) Uani 1 1 d . . .

P1 P 0.3186(3) 0.2342(2) 0.22937(14) 0.0370(5) Uani 1 1 d . . .

Cl3 Cl 0.6043(4) -0.1126(3) 0.43174(16) 0.0607(7) Uani 1 1 d . . .

Cl1 Cl 0.1126(4) -0.2169(4) 0.3425(2) 0.0836(9) Uani 1 1 d . . .

O1 O 0.4085(8) 0.3584(7) 0.1675(4) 0.0467(14) Uani 1 1 d . . .

O2 O 0.2223(7) 0.0841(7) 0.1471(4) 0.0418(13) Uani 1 1 d . . .

O3 O 0.0026(12) 0.3654(11) 0.1495(6) 0.083(3) Uani 1 1 d . . .

O4 O -0.1259(11) -0.0522(9) 0.2406(6) 0.075(2) Uani 1 1 d . . .

C1 C 0.5340(13) 0.5198(11) 0.2061(8) 0.058(3) Uani 1 1 d . . .

H1A H 0.5548 0.5381 0.2761 0.070 Uiso 1 1 calc R . .

C2 C 0.6996(19) 0.5366(18) 0.1643(16) 0.120(6) Uani 1 1 d . . .

H2A H 0.7850 0.6398 0.1880 0.180 Uiso 1 1 calc R . .

H2B H 0.6787 0.5166 0.0956 0.180 Uiso 1 1 calc R . .

H2C H 0.7402 0.4641 0.1828 0.180 Uiso 1 1 calc R . .

C3 C 0.4617(18) 0.6252(15) 0.1796(11) 0.083(4) Uani 1 1 d . . .

H3A H 0.3585 0.6115 0.2090 0.124 Uiso 1 1 calc R . .

H3B H 0.4348 0.6031 0.1111 0.124 Uiso 1 1 calc R . .

H3C H 0.5443 0.7300 0.2013 0.124 Uiso 1 1 calc R . .

C4 C 0.3050(15) 0.0154(14) 0.0730(7) 0.061(3) Uani 1 1 d . . .

H4A H 0.4305 0.0649 0.0898 0.073 Uiso 1 1 calc R . .

C5 C 0.245(3) -0.1461(17) 0.0746(10) 0.103(5) Uani 1 1 d . . .

H5A H 0.2814 -0.1571 0.1363 0.155 Uiso 1 1 calc R . .

H5B H 0.2916 -0.1959 0.0258 0.155 Uiso 1 1 calc R . .

H5C H 0.1212 -0.1931 0.0626 0.155 Uiso 1 1 calc R . .

C6 C 0.2581(18) 0.0485(18) -0.0198(7) 0.079(4) Uani 1 1 d . . .

H6A H 0.3101 0.0067 -0.0695 0.119 Uiso 1 1 calc R . .

H6B H 0.2990 0.1583 -0.0139 0.119 Uiso 1 1 calc R . .

H6C H 0.1350 0.0019 -0.0357 0.119 Uiso 1 1 calc R . .

C7 C 0.0482(14) 0.3270(12) 0.2115(7) 0.053(2) Uani 1 1 d . . .

C8 C -0.0301(13) 0.0705(12) 0.2668(7) 0.051(2) Uani 1 1 d . . .

C11 C 0.2271(18) 0.4806(13) 0.4080(7) 0.078(4) Uani 1 1 d . . .

H11A H 0.3057 0.5790 0.3946 0.093 Uiso 1 1 calc R . .

C12 C 0.0471(15) 0.4265(14) 0.4035(7) 0.061(3) Uani 1 1 d . . .

H12A H -0.0225 0.4798 0.3844 0.073 Uiso 1 1 calc R . .

C13 C -0.0179(15) 0.2818(14) 0.4303(7) 0.059(3) Uani 1 1 d . . .

H13A H -0.1388 0.2184 0.4346 0.070 Uiso 1 1 calc R . .

C14 C 0.1238(16) 0.2494(14) 0.4527(6) 0.062(3) Uani 1 1 d . . .

H14A H 0.1182 0.1571 0.4750 0.074 Uiso 1 1 calc R . .

C15 C 0.2746(15) 0.3685(15) 0.4405(7) 0.067(3) Uani 1 1 d . . .

H15A H 0.3921 0.3757 0.4534 0.080 Uiso 1 1 calc R . .

 

loop_

 _atom_site_aniso_label

 _atom_site_aniso_U_11

 _atom_site_aniso_U_22

 _atom_site_aniso_U_33

 _atom_site_aniso_U_23

 _atom_site_aniso_U_13

 _atom_site_aniso_U_12

Hg1 0.0745(4) 0.0523(3) 0.0558(3) 0.0236(2) 0.0041(2) 0.0263(2)

Fe1 0.0453(7) 0.0312(7) 0.0363(6) 0.0041(5) 0.0005(5) 0.0138(5)

Se1 0.0454(6) 0.0623(7) 0.0668(6) 0.0320(5) 0.0013(4) 0.0201(5)

P1 0.0408(12) 0.0301(11) 0.0391(10) 0.0115(9) 0.0020(9) 0.0118(9)

Cl3 0.0815(18) 0.0704(17) 0.0466(12) 0.0165(12) 0.0048(11) 0.0467(14)

Cl1 0.078(2) 0.077(2) 0.0814(19) 0.0318(16) -0.0050(15) 0.0117(15)

O1 0.054(4) 0.036(3) 0.050(3) 0.016(3) 0.006(3) 0.014(3)

O2 0.043(3) 0.034(3) 0.046(3) 0.002(3) 0.006(3) 0.016(3)

O3 0.110(7) 0.093(7) 0.064(5) 0.025(5) -0.009(4) 0.058(5)

O4 0.075(5) 0.045(5) 0.081(5) 0.009(4) 0.006(4) 0.002(4)

C1 0.062(6) 0.036(5) 0.067(6) 0.020(5) -0.002(5) 0.006(4)

C2 0.067(9) 0.070(10) 0.218(19) 0.046(11) 0.041(11) 0.015(7)

C3 0.091(9) 0.055(7) 0.108(10) 0.039(7) 0.014(7) 0.025(6)

C4 0.070(7) 0.072(8) 0.051(5) 0.006(5) 0.010(5) 0.043(6)

C5 0.178(16) 0.072(10) 0.076(8) 0.003(7) 0.017(9) 0.072(10)

C6 0.093(9) 0.108(11) 0.048(6) 0.015(6) 0.015(6) 0.053(8)

C7 0.059(6) 0.053(6) 0.053(5) 0.008(5) 0.003(5) 0.030(5)

C8 0.053(6) 0.038(6) 0.050(5) 0.002(4) 0.007(4) 0.007(5)

C11 0.119(11) 0.030(6) 0.052(6) -0.010(5) 0.015(6) 0.005(6)

C12 0.071(7) 0.072(8) 0.045(5) 0.001(5) 0.007(5) 0.041(6)

C13 0.068(7) 0.066(7) 0.043(5) 0.009(5) 0.013(5) 0.028(5)

C14 0.087(8) 0.063(7) 0.038(5) 0.010(5) 0.000(5) 0.035(6)

C15 0.067(7) 0.072(8) 0.047(5) -0.018(5) -0.011(5) 0.028(6)

 

_geom_special_details

;

 All esds (except the esd in the dihedral angle between two l.s. planes)

 are estimated using the full covariance matrix.  The cell esds are taken

 into account individually in the estimation of esds in distances, angles

 and torsion angles; correlations between esds in cell parameters are only

 used when they are defined by crystal symmetry.  An approximate (isotropic)

 treatment of cell esds is used for estimating esds involving l.s. planes.

;

 

loop_

 _geom_bond_atom_site_label_1

 _geom_bond_atom_site_label_2

 _geom_bond_distance

 _geom_bond_site_symmetry_2

 _geom_bond_publ_flag

Hg1 Cl1 2.392(4) . ?

Hg1 Se1 2.4931(19) . ?

Hg1 Cl3 2.610(3) . ?

Hg1 Cl3 2.742(4) 2_656 ?

Fe1 C7 1.758(11) . ?

Fe1 C8 1.786(10) . ?

Fe1 C14 2.077(10) . ?

Fe1 C15 2.087(10) . ?

Fe1 C11 2.091(10) . ?

Fe1 C13 2.102(10) . ?

Fe1 C12 2.105(10) . ?

Fe1 P1 2.216(3) . ?

Se1 P1 2.229(3) . ?

P1 O2 1.587(6) . ?

P1 O1 1.587(6) . ?

Cl3 Hg1 2.742(4) 2_656 ?

O1 C1 1.483(11) . ?

O2 C4 1.489(11) . ?

O3 C7 1.127(12) . ?

O4 C8 1.122(12) . ?

C1 C3 1.467(16) . ?

C1 C2 1.512(18) . ?

C4 C5 1.439(19) . ?

C4 C6 1.490(15) . ?

C11 C12 1.403(18) . ?

C11 C15 1.430(19) . ?

C12 C13 1.414(16) . ?

C13 C14 1.393(16) . ?

C14 C15 1.389(17) . ?

 

loop_

 _geom_angle_atom_site_label_1

 _geom_angle_atom_site_label_2

 _geom_angle_atom_site_label_3

 _geom_angle

 _geom_angle_site_symmetry_1

 _geom_angle_site_symmetry_3

 _geom_angle_publ_flag

Cl1 Hg1 Se1 135.86(9) . . ?

Cl1 Hg1 Cl3 105.47(13) . . ?

Se1 Hg1 Cl3 108.15(9) . . ?

Cl1 Hg1 Cl3 101.73(11) . 2_656 ?

Se1 Hg1 Cl3 108.22(9) . 2_656 ?

Cl3 Hg1 Cl3 86.16(9) . 2_656 ?

C7 Fe1 C8 93.1(5) . . ?

C7 Fe1 C14 153.7(5) . . ?

C8 Fe1 C14 93.9(5) . . ?

C7 Fe1 C15 138.4(5) . . ?

C8 Fe1 C15 128.1(5) . . ?

C14 Fe1 C15 39.0(5) . . ?

C7 Fe1 C11 100.0(5) . . ?

C8 Fe1 C11 156.6(4) . . ?

C14 Fe1 C11 66.1(5) . . ?

C15 Fe1 C11 40.0(5) . . ?

C7 Fe1 C13 115.7(5) . . ?

C8 Fe1 C13 90.6(4) . . ?

C14 Fe1 C13 38.9(4) . . ?

C15 Fe1 C13 65.9(4) . . ?

C11 Fe1 C13 66.3(5) . . ?

C7 Fe1 C12 89.7(4) . . ?

C8 Fe1 C12 122.6(5) . . ?

C14 Fe1 C12 65.2(5) . . ?

C15 Fe1 C12 65.7(5) . . ?

C11 Fe1 C12 39.1(5) . . ?

C13 Fe1 C12 39.3(4) . . ?

C7 Fe1 P1 88.2(3) . . ?

C8 Fe1 P1 91.7(3) . . ?

C14 Fe1 P1 116.9(3) . . ?

C15 Fe1 P1 94.3(3) . . ?

C11 Fe1 P1 107.9(4) . . ?

C13 Fe1 P1 155.8(3) . . ?

C12 Fe1 P1 145.7(3) . . ?

P1 Se1 Hg1 97.55(8) . . ?

O2 P1 O1 100.7(3) . . ?

O2 P1 Fe1 105.8(2) . . ?

O1 P1 Fe1 116.0(3) . . ?

O2 P1 Se1 109.1(3) . . ?

O1 P1 Se1 101.1(3) . . ?

Fe1 P1 Se1 122.11(12) . . ?

Hg1 Cl3 Hg1 93.84(9) . 2_656 ?

C1 O1 P1 125.7(6) . . ?

C4 O2 P1 126.0(6) . . ?

C3 C1 O1 108.7(9) . . ?

C3 C1 C2 112.9(10) . . ?

O1 C1 C2 106.8(10) . . ?

C5 C4 O2 106.7(10) . . ?

C5 C4 C6 114.8(11) . . ?

O2 C4 C6 106.9(8) . . ?

O3 C7 Fe1 178.3(10) . . ?

O4 C8 Fe1 177.4(10) . . ?

C12 C11 C15 106.8(10) . . ?

C12 C11 Fe1 71.0(6) . . ?

C15 C11 Fe1 69.8(6) . . ?

C11 C12 C13 109.0(10) . . ?

C11 C12 Fe1 69.9(6) . . ?

C13 C12 Fe1 70.3(6) . . ?

C14 C13 C12 106.8(10) . . ?

C14 C13 Fe1 69.6(6) . . ?

C12 C13 Fe1 70.5(6) . . ?

C15 C14 C13 109.9(11) . . ?

C15 C14 Fe1 70.9(6) . . ?

C13 C14 Fe1 71.5(6) . . ?

C14 C15 C11 107.5(11) . . ?

C14 C15 Fe1 70.1(6) . . ?

C11 C15 Fe1 70.1(6) . . ?

 

_diffrn_measured_fraction_theta_max    0.964

_diffrn_reflns_theta_full              24.49

_diffrn_measured_fraction_theta_full   0.964

_refine_diff_density_max    2.795

_refine_diff_density_min   -2.491

_refine_diff_density_rms    0.281


#===END


data_6
  
_audit_creation_method            SHELXL-97 
_chemical_name_systematic 
; 
 ? 
; 
_chemical_name_common             ? 
_chemical_melting_point           ? 
_chemical_formula_moiety          ? 
_chemical_formula_sum 
 'C13 H19 Br2 Fe Hg O4 P Se' 
_chemical_formula_weight          765.47 
  
loop_ 
 _atom_type_symbol 
 _atom_type_description 
 _atom_type_scat_dispersion_real 
 _atom_type_scat_dispersion_imag 
 _atom_type_scat_source 
 'C'  'C'   0.0033   0.0016 
 'International Tables Vol C Tables 4.2.6.8 and 6.1.1.4' 
 'H'  'H'   0.0000   0.0000 
 'International Tables Vol C Tables 4.2.6.8 and 6.1.1.4' 
 'O'  'O'   0.0106   0.0060 
 'International Tables Vol C Tables 4.2.6.8 and 6.1.1.4' 
 'P'  'P'   0.1023   0.0942 
 'International Tables Vol C Tables 4.2.6.8 and 6.1.1.4' 
 'Fe'  'Fe'   0.3463   0.8444 
 'International Tables Vol C Tables 4.2.6.8 and 6.1.1.4' 
 'Se'  'Se'  -0.0929   2.2259 
 'International Tables Vol C Tables 4.2.6.8 and 6.1.1.4' 
 'Br'  'Br'  -0.2901   2.4595 
 'International Tables Vol C Tables 4.2.6.8 and 6.1.1.4' 
 'Hg'  'Hg'  -2.3894   9.2266 
 'International Tables Vol C Tables 4.2.6.8 and 6.1.1.4' 
  
_symmetry_cell_setting            Triclinic 
_symmetry_space_group_name_H-M    P-1 
  
loop_ 
 _symmetry_equiv_pos_as_xyz 
 'x, y, z' 
 '-x, -y, -z' 
  
_cell_length_a                    8.4692(6) 
_cell_length_b                    9.6595(7) 
_cell_length_c                    14.6288(11) 
_cell_angle_alpha                 101.9110(10) 
_cell_angle_beta                  91.1600(10) 
_cell_angle_gamma                 112.7130(10) 
_cell_volume                      1073.54(14) 
_cell_formula_units_Z             2 
_cell_measurement_temperature     273(2) 
_cell_measurement_reflns_used     5390 
_cell_measurement_theta_min       2.35 
_cell_measurement_theta_max       24.72 
  
_exptl_crystal_description        block 
_exptl_crystal_colour             colourless 
_exptl_crystal_size_max           0.20 
_exptl_crystal_size_mid           0.15 
_exptl_crystal_size_min           0.10 
_exptl_crystal_density_meas       ? 
_exptl_crystal_density_diffrn     2.368 
_exptl_crystal_density_method     'not measured' 
_exptl_crystal_F_000              708 
_exptl_absorpt_coefficient_mu     13.321 
_exptl_absorpt_correction_type    multi-scan 
_exptl_absorpt_correction_T_min   0.1759 
_exptl_absorpt_correction_T_max   0.3493 
_exptl_absorpt_process_details    ? 
  
_exptl_special_details 
; 
 ? 
; 
  
_diffrn_ambient_temperature       273(2) 
_diffrn_radiation_wavelength      0.71073 
_diffrn_radiation_type            MoK\a 
_diffrn_radiation_source          'fine-focus sealed tube' 
_diffrn_radiation_monochromator   graphite 
_diffrn_measurement_device_type   'CCD area detector' 
_diffrn_measurement_method        'phi and omega scans' 
_diffrn_detector_area_resol_mean  ? 
_diffrn_standards_number          ? 
_diffrn_standards_interval_count  ? 
_diffrn_standards_interval_time   ? 
_diffrn_standards_decay_%         ? 
_diffrn_reflns_number             10843 
_diffrn_reflns_av_R_equivalents   0.0340 
_diffrn_reflns_av_sigmaI/netI     0.0362 
_diffrn_reflns_limit_h_min        -9 
_diffrn_reflns_limit_h_max        9 
_diffrn_reflns_limit_k_min        -11 
_diffrn_reflns_limit_k_max        11 
_diffrn_reflns_limit_l_min        -17 
_diffrn_reflns_limit_l_max        17 
_diffrn_reflns_theta_min          2.35 
_diffrn_reflns_theta_max          24.76 
_reflns_number_total              3661 
_reflns_number_gt                 3256 
_reflns_threshold_expression      >2sigma(I) 
  
_computing_data_collection        'Bruker SMART' 
_computing_cell_refinement        'Bruker SMART' 
_computing_data_reduction         'Bruker SAINT' 
_computing_structure_solution     'SHELXS-97 (Sheldrick, 1990)' 
_computing_structure_refinement   'SHELXL-97 (Sheldrick, 1997)' 
_computing_molecular_graphics     'Bruker SHELXTL' 
_computing_publication_material   'Bruker SHELXTL' 
  
_refine_special_details 
; 
 Refinement of F^2^ against ALL reflections.  The weighted R-factor wR and 
 goodness of fit S are based on F^2^, conventional R-factors R are based 
 on F, with F set to zero for negative F^2^. The threshold expression of 
 F^2^ > 2sigma(F^2^) is used only for calculating R-factors(gt) etc. and is 
 not relevant to the choice of reflections for refinement.  R-factors based 
 on F^2^ are statistically about twice as large as those based on F, and R- 
 factors based on ALL data will be even larger. 
; 
  
_refine_ls_structure_factor_coef  Fsqd 
_refine_ls_matrix_type            full 
_refine_ls_weighting_scheme       calc 
_refine_ls_weighting_details 
 'calc w=1/[\s^2^(Fo^2^)+(0.0390P)^2^+0.5263P] where P=(Fo^2^+2Fc^2^)/3' 
_atom_sites_solution_primary      direct 
_atom_sites_solution_secondary    difmap 
_atom_sites_solution_hydrogens    geom 
_refine_ls_hydrogen_treatment     constr 
_refine_ls_extinction_method      none 
_refine_ls_extinction_coef        ? 
_refine_ls_number_reflns          3661 
_refine_ls_number_parameters      208 
_refine_ls_number_restraints      0 
_refine_ls_R_factor_all           0.0339 
_refine_ls_R_factor_gt            0.0292 
_refine_ls_wR_factor_ref          0.0749 
_refine_ls_wR_factor_gt           0.0732 
_refine_ls_goodness_of_fit_ref    1.067 
_refine_ls_restrained_S_all       1.067 
_refine_ls_shift/su_max           0.001 
_refine_ls_shift/su_mean          0.000 
  
loop_ 
 _atom_site_label 
 _atom_site_type_symbol 
 _atom_site_fract_x 
 _atom_site_fract_y 
 _atom_site_fract_z 
 _atom_site_U_iso_or_equiv 
 _atom_site_adp_type 
 _atom_site_occupancy 
 _atom_site_symmetry_multiplicity 
 _atom_site_calc_flag 
 _atom_site_refinement_flags 
 _atom_site_disorder_assembly 
 _atom_site_disorder_group 
Hg1 Hg 0.11518(3) 0.49998(2) 0.622467(16) 0.05513(10) Uani 1 1 d . . . 
Fe1 Fe 0.39574(8) 0.23189(7) 0.69481(5) 0.03417(16) Uani 1 1 d . . . 
Br1 Br 0.10269(7) 0.37433(6) 0.42509(4) 0.04906(15) Uani 1 1 d . . . 
Br2 Br 0.41067(9) 0.71152(8) 0.65982(5) 0.0699(2) Uani 1 1 d . . . 
Se1 Se -0.03679(7) 0.28312(7) 0.70078(4) 0.05176(16) Uani 1 1 d . . . 
P1 P 0.18969(15) 0.27002(13) 0.77269(9) 0.0331(3) Uani 1 1 d . . . 
O1 O 0.2828(4) 0.4223(4) 0.8526(2) 0.0400(8) Uani 1 1 d . . . 
O2 O 0.0994(4) 0.1486(4) 0.8345(2) 0.0400(8) Uani 1 1 d . . . 
O3 O 0.6405(5) 0.5482(4) 0.7698(3) 0.0620(11) Uani 1 1 d . . . 
O4 O 0.4954(6) 0.1274(5) 0.8506(3) 0.0728(13) Uani 1 1 d . . . 
C1 C 0.1957(8) 0.4870(7) 0.9259(4) 0.0577(15) Uani 1 1 d . . . 
H1A H 0.0706 0.4356 0.9097 0.069 Uiso 1 1 calc R . . 
C2 C 0.2550(15) 0.6537(9) 0.9258(6) 0.112(3) Uani 1 1 d . . . 
H2A H 0.2174 0.6638 0.8661 0.168 Uiso 1 1 calc R . . 
H2B H 0.3785 0.7016 0.9365 0.168 Uiso 1 1 calc R . . 
H2C H 0.2074 0.7031 0.9747 0.168 Uiso 1 1 calc R . . 
C3 C 0.2439(10) 0.4577(9) 1.0165(5) 0.0739(19) Uani 1 1 d . . . 
H3A H 0.2038 0.3485 1.0111 0.111 Uiso 1 1 calc R . . 
H3B H 0.1922 0.5013 1.0659 0.111 Uiso 1 1 calc R . . 
H3C H 0.3669 0.5044 1.0309 0.111 Uiso 1 1 calc R . . 
C4 C -0.0228(7) -0.0117(6) 0.7975(4) 0.0490(13) Uani 1 1 d . . . 
H4A H -0.0417 -0.0342 0.7287 0.059 Uiso 1 1 calc R . . 
C5 C 0.0483(9) -0.1155(7) 0.8271(6) 0.0739(19) Uani 1 1 d . . . 
H5A H 0.1524 -0.1051 0.7989 0.111 Uiso 1 1 calc R . . 
H5B H -0.0343 -0.2203 0.8073 0.111 Uiso 1 1 calc R . . 
H5C H 0.0727 -0.0883 0.8943 0.111 Uiso 1 1 calc R . . 
C6 C -0.1898(10) -0.0277(10) 0.8391(8) 0.109(3) Uani 1 1 d . . . 
H6A H -0.2342 0.0398 0.8185 0.163 Uiso 1 1 calc R . . 
H6B H -0.1687 -0.0004 0.9065 0.163 Uiso 1 1 calc R . . 
H6C H -0.2723 -0.1324 0.8187 0.163 Uiso 1 1 calc R . . 
C7 C 0.5426(7) 0.4288(6) 0.7410(4) 0.0420(11) Uani 1 1 d . . . 
C8 C 0.4534(7) 0.1682(6) 0.7904(4) 0.0456(12) Uani 1 1 d . . . 
C9 C 0.2396(8) 0.1287(8) 0.5662(4) 0.0664(19) Uani 1 1 d . . . 
H9A H 0.1204 0.1174 0.5547 0.080 Uiso 1 1 calc R . . 
C10 C 0.3844(9) 0.2527(7) 0.5561(4) 0.0577(15) Uani 1 1 d . . . 
H10A H 0.3858 0.3433 0.5353 0.069 Uiso 1 1 calc R . . 
C11 C 0.5295(8) 0.2219(7) 0.5764(4) 0.0533(14) Uani 1 1 d . . . 
H11A H 0.6497 0.2880 0.5727 0.064 Uiso 1 1 calc R . . 
C12 C 0.4725(8) 0.0812(6) 0.6006(4) 0.0535(14) Uani 1 1 d . . . 
H12A H 0.5459 0.0309 0.6175 0.064 Uiso 1 1 calc R . . 
C13 C 0.2918(9) 0.0213(7) 0.5965(4) 0.0663(19) Uani 1 1 d . . . 
H13A H 0.2164 -0.0785 0.6079 0.080 Uiso 1 1 calc R . . 
  
loop_ 
 _atom_site_aniso_label 
 _atom_site_aniso_U_11 
 _atom_site_aniso_U_22 
 _atom_site_aniso_U_33 
 _atom_site_aniso_U_23 
 _atom_site_aniso_U_13 
 _atom_site_aniso_U_12 
Hg1 0.06106(17) 0.05489(15) 0.05311(16) 0.02573(11) -0.00325(11) 0.02084(12) 
Fe1 0.0351(4) 0.0357(3) 0.0309(4) 0.0075(3) -0.0018(3) 0.0137(3) 
Br1 0.0585(3) 0.0570(3) 0.0407(3) 0.0143(2) -0.0012(2) 0.0314(3) 
Br2 0.0631(4) 0.0662(4) 0.0718(4) 0.0295(3) -0.0110(3) 0.0106(3) 
Se1 0.0362(3) 0.0673(4) 0.0612(4) 0.0363(3) -0.0012(2) 0.0203(3) 
P1 0.0318(6) 0.0354(6) 0.0341(7) 0.0134(5) -0.0006(5) 0.0131(5) 
O1 0.0402(18) 0.0391(17) 0.039(2) 0.0035(15) 0.0057(15) 0.0171(15) 
O2 0.0413(19) 0.0395(17) 0.0378(19) 0.0182(15) 0.0011(15) 0.0101(15) 
O3 0.052(2) 0.043(2) 0.069(3) 0.009(2) -0.005(2) -0.0016(19) 
O4 0.081(3) 0.091(3) 0.065(3) 0.031(3) -0.006(2) 0.047(3) 
C1 0.047(3) 0.076(4) 0.056(4) 0.001(3) 0.004(3) 0.038(3) 
C2 0.201(11) 0.074(5) 0.078(6) -0.002(4) 0.014(6) 0.082(6) 
C3 0.089(5) 0.095(5) 0.048(4) 0.014(3) 0.012(3) 0.049(4) 
C4 0.052(3) 0.040(3) 0.046(3) 0.018(2) -0.007(2) 0.006(2) 
C5 0.080(5) 0.054(4) 0.094(5) 0.035(4) 0.005(4) 0.024(3) 
C6 0.056(5) 0.079(5) 0.197(11) 0.058(6) 0.021(6) 0.021(4) 
C7 0.036(3) 0.052(3) 0.038(3) 0.014(2) 0.007(2) 0.016(3) 
C8 0.047(3) 0.053(3) 0.041(3) 0.011(2) -0.002(2) 0.025(3) 
C9 0.052(4) 0.094(5) 0.041(3) -0.013(3) -0.013(3) 0.032(4) 
C10 0.084(5) 0.069(4) 0.030(3) 0.012(3) 0.001(3) 0.042(4) 
C11 0.059(4) 0.065(4) 0.038(3) 0.013(3) 0.009(3) 0.027(3) 
C12 0.069(4) 0.057(3) 0.040(3) 0.002(3) 0.009(3) 0.036(3) 
C13 0.075(4) 0.048(3) 0.044(4) -0.013(3) 0.009(3) 0.003(3) 
  
_geom_special_details 
; 
 All esds (except the esd in the dihedral angle between two l.s. planes) 
 are estimated using the full covariance matrix.  The cell esds are taken 
 into account individually in the estimation of esds in distances, angles 
 and torsion angles; correlations between esds in cell parameters are only 
 used when they are defined by crystal symmetry.  An approximate (isotropic) 
 treatment of cell esds is used for estimating esds involving l.s. planes. 
; 
  
loop_ 
 _geom_bond_atom_site_label_1 
 _geom_bond_atom_site_label_2 
 _geom_bond_distance 
 _geom_bond_site_symmetry_2 
 _geom_bond_publ_flag 
Hg1 Br2 2.5043(7) . ? 
Hg1 Se1 2.5151(6) . ? 
Hg1 Br1 2.7184(6) 2_566 ? 
Hg1 Br1 2.8745(6) . ? 
Fe1 C8 1.769(6) . ? 
Fe1 C7 1.797(6) . ? 
Fe1 C13 2.084(5) . ? 
Fe1 C10 2.084(6) . ? 
Fe1 C12 2.093(5) . ? 
Fe1 C9 2.095(6) . ? 
Fe1 C11 2.096(6) . ? 
Fe1 P1 2.2097(14) . ? 
Br1 Hg1 2.7184(6) 2_566 ? 
Se1 P1 2.2276(13) . ? 
P1 O1 1.584(3) . ? 
P1 O2 1.597(3) . ? 
O1 C1 1.482(6) . ? 
O2 C4 1.469(6) . ? 
O3 C7 1.114(6) . ? 
O4 C8 1.139(7) . ? 
C1 C2 1.491(10) . ? 
C1 C3 1.492(9) . ? 
C4 C5 1.479(8) . ? 
C4 C6 1.517(10) . ? 
C9 C10 1.380(10) . ? 
C9 C13 1.416(10) . ? 
C10 C11 1.411(9) . ? 
C11 C12 1.380(8) . ? 
C12 C13 1.407(9) . ? 
  
loop_ 
 _geom_angle_atom_site_label_1 
 _geom_angle_atom_site_label_2 
 _geom_angle_atom_site_label_3 
 _geom_angle 
 _geom_angle_site_symmetry_1 
 _geom_angle_site_symmetry_3 
 _geom_angle_publ_flag 
Br2 Hg1 Se1 130.93(2) . . ? 
Br2 Hg1 Br1 107.28(2) . 2_566 ? 
Se1 Hg1 Br1 110.71(2) . 2_566 ? 
Br2 Hg1 Br1 102.55(2) . . ? 
Se1 Hg1 Br1 108.99(2) . . ? 
Br1 Hg1 Br1 87.395(17) 2_566 . ? 
C8 Fe1 C7 93.3(2) . . ? 
C8 Fe1 C13 98.9(3) . . ? 
C7 Fe1 C13 155.9(2) . . ? 
C8 Fe1 C10 155.7(2) . . ? 
C7 Fe1 C10 94.8(3) . . ? 
C13 Fe1 C10 66.1(3) . . ? 
C8 Fe1 C12 90.7(2) . . ? 
C7 Fe1 C12 120.3(2) . . ? 
C13 Fe1 C12 39.4(2) . . ? 
C10 Fe1 C12 65.5(2) . . ? 
C8 Fe1 C9 136.4(3) . . ? 
C7 Fe1 C9 130.0(3) . . ? 
C13 Fe1 C9 39.6(3) . . ? 
C10 Fe1 C9 38.6(3) . . ? 
C12 Fe1 C9 65.3(2) . . ? 
C8 Fe1 C11 117.8(2) . . ? 
C7 Fe1 C11 90.2(2) . . ? 
C13 Fe1 C11 65.7(2) . . ? 
C10 Fe1 C11 39.5(2) . . ? 
C12 Fe1 C11 38.5(2) . . ? 
C9 Fe1 C11 65.1(2) . . ? 
C8 Fe1 P1 88.44(18) . . ? 
C7 Fe1 P1 91.42(16) . . ? 
C13 Fe1 P1 109.54(19) . . ? 
C10 Fe1 P1 114.15(18) . . ? 
C12 Fe1 P1 148.22(18) . . ? 
C9 Fe1 P1 94.29(18) . . ? 
C11 Fe1 P1 153.58(17) . . ? 
Hg1 Br1 Hg1 92.605(17) 2_566 . ? 
P1 Se1 Hg1 99.84(4) . . ? 
O1 P1 O2 100.65(18) . . ? 
O1 P1 Fe1 106.00(13) . . ? 
O2 P1 Fe1 115.29(14) . . ? 
O1 P1 Se1 109.08(13) . . ? 
O2 P1 Se1 101.74(13) . . ? 
Fe1 P1 Se1 122.03(6) . . ? 
C1 O1 P1 124.9(3) . . ? 
C4 O2 P1 125.4(3) . . ? 
O1 C1 C2 105.8(6) . . ? 
O1 C1 C3 107.6(5) . . ? 
C2 C1 C3 114.1(6) . . ? 
O2 C4 C5 108.7(5) . . ? 
O2 C4 C6 106.7(5) . . ? 
C5 C4 C6 110.9(6) . . ? 
O3 C7 Fe1 176.3(5) . . ? 
O4 C8 Fe1 177.7(5) . . ? 
C10 C9 C13 108.8(6) . . ? 
C10 C9 Fe1 70.3(3) . . ? 
C13 C9 Fe1 69.7(3) . . ? 
C9 C10 C11 107.7(6) . . ? 
C9 C10 Fe1 71.2(4) . . ? 
C11 C10 Fe1 70.7(3) . . ? 
C12 C11 C10 108.1(6) . . ? 
C12 C11 Fe1 70.7(3) . . ? 
C10 C11 Fe1 69.8(3) . . ? 
C11 C12 C13 108.9(6) . . ? 
C11 C12 Fe1 70.9(3) . . ? 
C13 C12 Fe1 70.0(3) . . ? 
C12 C13 C9 106.4(6) . . ? 
C12 C13 Fe1 70.7(3) . . ? 
C9 C13 Fe1 70.6(3) . . ? 
  
_diffrn_measured_fraction_theta_max    0.998 
_diffrn_reflns_theta_full              24.76 
_diffrn_measured_fraction_theta_full   0.998 
_refine_diff_density_max    0.856 
_refine_diff_density_min   -1.022 
_refine_diff_density_rms    0.138 
  

#===END


data_8

 

_audit_creation_method            SHELXL-97

_chemical_name_systematic

;

 ?

;

_chemical_name_common             ?

_chemical_melting_point           ?

_chemical_formula_moiety          ?

_chemical_formula_sum

 'C13 H19 Cd Cl2 Fe O4 P Se'

_chemical_formula_weight          588.36

 

loop_

 _atom_type_symbol

 _atom_type_description

 _atom_type_scat_dispersion_real

 _atom_type_scat_dispersion_imag

 _atom_type_scat_source

 'C'  'C'   0.0033   0.0016

 'International Tables Vol C Tables 4.2.6.8 and 6.1.1.4'

 'H'  'H'   0.0000   0.0000

 'International Tables Vol C Tables 4.2.6.8 and 6.1.1.4'

 'O'  'O'   0.0106   0.0060

 'International Tables Vol C Tables 4.2.6.8 and 6.1.1.4'

 'P'  'P'   0.1023   0.0942

 'International Tables Vol C Tables 4.2.6.8 and 6.1.1.4'

 'Fe'  'Fe'   0.3463   0.8444

 'International Tables Vol C Tables 4.2.6.8 and 6.1.1.4'

 'Se'  'Se'  -0.0929   2.2259

 'International Tables Vol C Tables 4.2.6.8 and 6.1.1.4'

 'Cd'  'Cd'  -0.8075   1.2024

 'International Tables Vol C Tables 4.2.6.8 and 6.1.1.4'

 'Cl'  'Cl'   0.1484   0.1585

 'International Tables Vol C Tables 4.2.6.8 and 6.1.1.4'

 

_symmetry_cell_setting            Monoclinic

_symmetry_space_group_name_H-M    P2(1)/c

 

loop_

 _symmetry_equiv_pos_as_xyz

 'x, y, z'

 '-x, y+1/2, -z+1/2'

 '-x, -y, -z'

 'x, -y-1/2, z-1/2'

 

_cell_length_a                    13.547(8)

_cell_length_b                    9.094(6)

_cell_length_c                    17.277(11)

_cell_angle_alpha                 90.00

_cell_angle_beta                  92.274(14)

_cell_angle_gamma                 90.00

_cell_volume                      2127(2)

_cell_formula_units_Z             4

_cell_measurement_temperature     273(2)

_cell_measurement_reflns_used     2136

_cell_measurement_theta_min       2.53

_cell_measurement_theta_max       20.18

 

_exptl_crystal_description        plate

_exptl_crystal_colour             colourless

_exptl_crystal_size_max           0.40

_exptl_crystal_size_mid           0.25

_exptl_crystal_size_min           0.10

_exptl_crystal_density_meas       ?

_exptl_crystal_density_diffrn     1.838

_exptl_crystal_density_method     'not measured'

_exptl_crystal_F_000              1144

_exptl_absorpt_coefficient_mu     3.731

_exptl_absorpt_correction_type    multi-scan

_exptl_absorpt_correction_T_min   0.7246

_exptl_absorpt_correction_T_max   1.0000

_exptl_absorpt_process_details    SADABS

 

_exptl_special_details

;

 ?

;

 

_diffrn_ambient_temperature       273(2)

_diffrn_radiation_wavelength      0.71073

_diffrn_radiation_type            MoK\a

_diffrn_radiation_source          'fine-focus sealed tube'

_diffrn_radiation_monochromator   graphite

_diffrn_measurement_device_type   'CCD area detector'

_diffrn_measurement_method        'phi and omega scans'

_diffrn_detector_area_resol_mean  ?

_diffrn_standards_number          ?

_diffrn_standards_interval_count  ?

_diffrn_standards_interval_time   ?

_diffrn_standards_decay_%         ?

_diffrn_reflns_number             17193

_diffrn_reflns_av_R_equivalents   0.0989

_diffrn_reflns_av_sigmaI/netI     0.0791

_diffrn_reflns_limit_h_min        -16

_diffrn_reflns_limit_h_max        16

_diffrn_reflns_limit_k_min        -10

_diffrn_reflns_limit_k_max        10

_diffrn_reflns_limit_l_min        -20

_diffrn_reflns_limit_l_max        20

_diffrn_reflns_theta_min          1.50

_diffrn_reflns_theta_max          25.68

_reflns_number_total              3771

_reflns_number_gt                 2224

_reflns_threshold_expression      >2sigma(I)

 

_computing_data_collection        'Bruker SMART'

_computing_cell_refinement        'Bruker SMART'

_computing_data_reduction         'Bruker SAINT'

_computing_structure_solution     'SHELXS-97 (Sheldrick, 1990)'

_computing_structure_refinement   'SHELXL-97 (Sheldrick, 1997)'

_computing_molecular_graphics     'Bruker SHELXTL'

_computing_publication_material   'Bruker SHELXTL'

 

_refine_special_details

;

 Refinement of F^2^ against ALL reflections.  The weighted R-factor wR and

 goodness of fit S are based on F^2^, conventional R-factors R are based

 on F, with F set to zero for negative F^2^. The threshold expression of

 F^2^ > 2sigma(F^2^) is used only for calculating R-factors(gt) etc. and is

 not relevant to the choice of reflections for refinement.  R-factors based

 on F^2^ are statistically about twice as large as those based on F, and R-

 factors based on ALL data will be even larger.

;

 

_refine_ls_structure_factor_coef  Fsqd

_refine_ls_matrix_type            full

_refine_ls_weighting_scheme       calc

_refine_ls_weighting_details

 'calc w=1/[\s^2^(Fo^2^)+(0.0447P)^2^+0.0000P] where P=(Fo^2^+2Fc^2^)/3'

_atom_sites_solution_primary      direct

_atom_sites_solution_secondary    difmap

_atom_sites_solution_hydrogens    geom

_refine_ls_hydrogen_treatment     constr

_refine_ls_extinction_method      none

_refine_ls_extinction_coef        ?

_refine_ls_number_reflns          3771

_refine_ls_number_parameters      212

_refine_ls_number_restraints      0

_refine_ls_R_factor_all           0.1022

_refine_ls_R_factor_gt            0.0463

_refine_ls_wR_factor_ref          0.0994

_refine_ls_wR_factor_gt           0.0849

_refine_ls_goodness_of_fit_ref    0.945

_refine_ls_restrained_S_all       0.945

_refine_ls_shift/su_max           0.001

_refine_ls_shift/su_mean          0.000

 

loop_

 _atom_site_label

 _atom_site_type_symbol

 _atom_site_fract_x

 _atom_site_fract_y

 _atom_site_fract_z

 _atom_site_U_iso_or_equiv

 _atom_site_adp_type

 _atom_site_occupancy

 _atom_site_symmetry_multiplicity

 _atom_site_calc_flag

 _atom_site_refinement_flags

 _atom_site_disorder_assembly

 _atom_site_disorder_group

Cd1 Cd 0.87941(4) 0.46347(6) 0.04179(3) 0.05090(18) Uani 1 1 d . . .

Se1 Se 0.85847(6) 0.34775(9) 0.17630(4) 0.0572(2) Uani 1 1 d . . .

Fe1 Fe 0.76438(7) -0.02268(11) 0.21280(5) 0.0474(3) Uani 1 1 d . . .

P1 P 0.75414(12) 0.1753(2) 0.14000(10) 0.0451(5) Uani 1 1 d . . .

Cl2 Cl 1.02471(13) 0.6518(2) 0.06252(11) 0.0616(5) Uani 1 1 d . . .

Cl1 Cl 0.74768(14) 0.6149(2) -0.01183(12) 0.0714(6) Uani 1 1 d . . .

C2 C 0.9060(6) -0.0610(13) 0.1757(6) 0.084(3) Uani 1 1 d . . .

H2 H 0.9369 -0.0101 0.1329 0.101 Uiso 1 1 calc R . .

C1 C 0.9123(6) -0.0191(10) 0.2517(5) 0.070(2) Uani 1 1 d . . .

H1 H 0.9483 0.0662 0.2729 0.083 Uiso 1 1 calc R . .

C5 C 0.8604(7) -0.1228(11) 0.2942(5) 0.083(3) Uani 1 1 d . . .

H5 H 0.8536 -0.1222 0.3505 0.099 Uiso 1 1 calc R . .

C3 C 0.8491(8) -0.1887(12) 0.1690(6) 0.095(3) Uani 1 1 d . . .

H3 H 0.8345 -0.2439 0.1212 0.114 Uiso 1 1 calc R . .

C4 C 0.8227(7) -0.2292(10) 0.2431(7) 0.092(3) Uani 1 1 d . . .

H4 H 0.7849 -0.3167 0.2568 0.110 Uiso 1 1 calc R . .

C7 C 0.7079(6) 0.0772(8) 0.2872(5) 0.062(2) Uani 1 1 d . . .

C6 C 0.6520(7) -0.0910(9) 0.1722(5) 0.070(2) Uani 1 1 d . . .

O1 O 0.5804(5) -0.1382(8) 0.1449(4) 0.107(2) Uani 1 1 d . . .

O2 O 0.6720(5) 0.1408(7) 0.3353(4) 0.111(2) Uani 1 1 d . . .

O3 O 0.7751(3) 0.1610(5) 0.0500(2) 0.0596(13) Uani 1 1 d . . .

O4 O 0.6445(3) 0.2295(5) 0.1466(3) 0.0670(15) Uani 1 1 d . . .

C8 C 0.7466(7) 0.0342(10) 0.0022(4) 0.080(3) Uani 1 1 d . . .

H8 H 0.7450 -0.0529 0.0354 0.096 Uiso 1 1 calc R . .

C11 C 0.6013(7) 0.3710(11) 0.1227(7) 0.104(4) Uani 1 1 d . . .

H11 H 0.6457 0.4215 0.0880 0.125 Uiso 1 1 calc R . .

C9 C 0.8271(9) 0.0144(11) -0.0544(5) 0.125(4) Uani 1 1 d . . .

H9A H 0.8292 0.0987 -0.0877 0.188 Uiso 1 1 calc R . .

H9B H 0.8141 -0.0722 -0.0849 0.188 Uiso 1 1 calc R . .

H9C H 0.8895 0.0040 -0.0266 0.188 Uiso 1 1 calc R . .

C10 C 0.6461(8) 0.0559(13) -0.0350(6) 0.149(5) Uani 1 1 d . . .

H10A H 0.5978 0.0571 0.0042 0.223 Uiso 1 1 calc R . .

H10B H 0.6318 -0.0231 -0.0705 0.223 Uiso 1 1 calc R . .

H10C H 0.6442 0.1477 -0.0625 0.223 Uiso 1 1 calc R . .

C12 C 0.5917(9) 0.4589(13) 0.1945(10) 0.176(7) Uani 1 1 d . . .

H12A H 0.5388 0.4202 0.2237 0.264 Uiso 1 1 calc R . .

H12B H 0.5779 0.5595 0.1811 0.264 Uiso 1 1 calc R . .

H12C H 0.6523 0.4539 0.2251 0.264 Uiso 1 1 calc R . .

C13 C 0.5059(9) 0.3461(16) 0.0826(10) 0.221(9) Uani 1 1 d . . .

H13A H 0.5158 0.2971 0.0343 0.331 Uiso 1 1 calc R . .

H13B H 0.4738 0.4387 0.0729 0.331 Uiso 1 1 calc R . .

H13C H 0.4654 0.2860 0.1142 0.331 Uiso 1 1 calc R . .

 

loop_

 _atom_site_aniso_label

 _atom_site_aniso_U_11

 _atom_site_aniso_U_22

 _atom_site_aniso_U_33

 _atom_site_aniso_U_23

 _atom_site_aniso_U_13

 _atom_site_aniso_U_12

Cd1 0.0480(3) 0.0544(3) 0.0507(3) -0.0011(3) 0.0081(2) -0.0004(3)

Se1 0.0614(5) 0.0602(5) 0.0497(5) -0.0015(4) -0.0009(4) -0.0175(4)

Fe1 0.0564(6) 0.0451(6) 0.0408(6) -0.0006(5) 0.0021(5) 0.0052(5)

P1 0.0387(10) 0.0484(12) 0.0481(11) 0.0051(9) 0.0001(8) -0.0034(8)

Cl2 0.0615(12) 0.0570(12) 0.0675(12) -0.0184(10) 0.0191(10) -0.0118(9)

Cl1 0.0662(13) 0.0786(15) 0.0688(13) 0.0025(11) -0.0054(10) 0.0161(11)

C2 0.063(6) 0.121(9) 0.068(7) 0.015(6) 0.010(5) 0.039(6)

C1 0.058(5) 0.071(6) 0.078(6) 0.009(5) -0.019(5) 0.013(4)

C5 0.098(7) 0.098(8) 0.052(5) 0.008(6) -0.007(5) 0.025(6)

C3 0.120(9) 0.084(8) 0.079(8) -0.038(6) -0.023(6) 0.060(7)

C4 0.103(8) 0.058(6) 0.115(9) 0.020(7) -0.005(7) 0.027(5)

C7 0.078(6) 0.046(5) 0.063(5) 0.001(4) 0.013(4) 0.003(4)

C6 0.079(6) 0.055(5) 0.077(6) 0.021(5) 0.003(5) -0.003(5)

O1 0.074(5) 0.107(5) 0.139(6) 0.018(5) -0.014(4) -0.041(4)

O2 0.150(6) 0.097(5) 0.089(5) -0.018(4) 0.055(4) 0.026(4)

O3 0.080(3) 0.059(3) 0.039(3) 0.002(3) -0.002(2) -0.020(3)

O4 0.040(3) 0.061(3) 0.099(4) 0.024(3) 0.002(3) 0.001(2)

C8 0.116(7) 0.076(6) 0.046(5) 0.010(5) -0.011(5) -0.045(6)

C11 0.067(6) 0.064(7) 0.183(12) 0.039(7) 0.029(7) 0.012(5)

C9 0.194(12) 0.111(8) 0.074(7) -0.043(6) 0.037(7) -0.072(8)

C10 0.159(11) 0.178(12) 0.103(9) 0.035(8) -0.080(8) -0.072(9)

C12 0.118(10) 0.097(10) 0.31(2) -0.003(12) 0.021(12) 0.034(8)

C13 0.096(10) 0.207(16) 0.35(2) 0.071(16) -0.090(12) 0.035(10)

 

_geom_special_details

;

 All esds (except the esd in the dihedral angle between two l.s. planes)

 are estimated using the full covariance matrix.  The cell esds are taken

 into account individually in the estimation of esds in distances, angles

 and torsion angles; correlations between esds in cell parameters are only

 used when they are defined by crystal symmetry.  An approximate (isotropic)

 treatment of cell esds is used for estimating esds involving l.s. planes.

;

 

loop_

 _geom_bond_atom_site_label_1

 _geom_bond_atom_site_label_2

 _geom_bond_distance

 _geom_bond_site_symmetry_2

 _geom_bond_publ_flag

Cd1 Cl1 2.410(2) . ?

Cd1 Cl2 2.494(2) 3_765 ?

Cd1 Se1 2.5771(16) . ?

Cd1 Cl2 2.623(2) . ?

Se1 P1 2.187(2) . ?

Fe1 C6 1.764(10) . ?

Fe1 C7 1.772(8) . ?

Fe1 C3 2.058(8) . ?

Fe1 C2 2.076(8) . ?

Fe1 C5 2.086(8) . ?

Fe1 C1 2.088(8) . ?

Fe1 C4 2.096(8) . ?

Fe1 P1 2.197(2) . ?

P1 O4 1.574(5) . ?

P1 O3 1.597(5) . ?

Cl2 Cd1 2.494(2) 3_765 ?

C2 C1 1.367(11) . ?

C2 C3 1.396(13) . ?

C1 C5 1.400(11) . ?

C5 C4 1.394(12) . ?

C3 C4 1.393(13) . ?

C7 O2 1.138(8) . ?

C6 O1 1.145(9) . ?

O3 C8 1.462(9) . ?

O4 C11 1.466(9) . ?

C8 C10 1.495(12) . ?

C8 C9 1.504(12) . ?

C11 C13 1.459(14) . ?

C11 C12 1.486(17) . ?

 

loop_

 _geom_angle_atom_site_label_1

 _geom_angle_atom_site_label_2

 _geom_angle_atom_site_label_3

 _geom_angle

 _geom_angle_site_symmetry_1

 _geom_angle_site_symmetry_3

 _geom_angle_publ_flag

Cl1 Cd1 Cl2 111.18(8) . 3_765 ?

Cl1 Cd1 Se1 118.27(6) . . ?

Cl2 Cd1 Se1 124.00(7) 3_765 . ?

Cl1 Cd1 Cl2 102.70(9) . . ?

Cl2 Cd1 Cl2 87.91(7) 3_765 . ?

Se1 Cd1 Cl2 104.61(6) . . ?

P1 Se1 Cd1 97.31(6) . . ?

C6 Fe1 C7 94.5(4) . . ?

C6 Fe1 C3 94.6(4) . . ?

C7 Fe1 C3 154.9(4) . . ?

C6 Fe1 C2 127.7(4) . . ?

C7 Fe1 C2 137.8(4) . . ?

C3 Fe1 C2 39.5(4) . . ?

C6 Fe1 C5 128.3(4) . . ?

C7 Fe1 C5 90.6(4) . . ?

C3 Fe1 C5 65.5(3) . . ?

C2 Fe1 C5 64.9(3) . . ?

C6 Fe1 C1 159.3(4) . . ?

C7 Fe1 C1 101.2(4) . . ?

C3 Fe1 C1 65.7(4) . . ?

C2 Fe1 C1 38.3(3) . . ?

C5 Fe1 C1 39.2(3) . . ?

C6 Fe1 C4 95.4(4) . . ?

C7 Fe1 C4 116.6(4) . . ?

C3 Fe1 C4 39.2(4) . . ?

C2 Fe1 C4 65.4(4) . . ?

C5 Fe1 C4 38.9(3) . . ?

C1 Fe1 C4 65.6(4) . . ?

C6 Fe1 P1 91.5(3) . . ?

C7 Fe1 P1 88.6(2) . . ?

C3 Fe1 P1 114.4(4) . . ?

C2 Fe1 P1 90.0(3) . . ?

C5 Fe1 P1 140.1(3) . . ?

C1 Fe1 P1 102.1(3) . . ?

C4 Fe1 P1 153.1(3) . . ?

O4 P1 O3 107.5(3) . . ?

O4 P1 Se1 110.8(2) . . ?

O3 P1 Se1 101.51(18) . . ?

O4 P1 Fe1 104.70(19) . . ?

O3 P1 Fe1 118.8(2) . . ?

Se1 P1 Fe1 113.46(9) . . ?

Cd1 Cl2 Cd1 92.09(7) 3_765 . ?

C1 C2 C3 109.0(9) . . ?

C1 C2 Fe1 71.3(5) . . ?

C3 C2 Fe1 69.6(5) . . ?

C2 C1 C5 107.6(9) . . ?

C2 C1 Fe1 70.4(5) . . ?

C5 C1 Fe1 70.3(5) . . ?

C4 C5 C1 108.3(8) . . ?

C4 C5 Fe1 70.9(5) . . ?

C1 C5 Fe1 70.5(5) . . ?

C4 C3 C2 107.8(9) . . ?

C4 C3 Fe1 71.9(5) . . ?

C2 C3 Fe1 71.0(5) . . ?

C3 C4 C5 107.3(9) . . ?

C3 C4 Fe1 69.0(5) . . ?

C5 C4 Fe1 70.2(5) . . ?

O2 C7 Fe1 179.6(8) . . ?

O1 C6 Fe1 178.2(9) . . ?

C8 O3 P1 124.1(4) . . ?

C11 O4 P1 128.5(5) . . ?

O3 C8 C10 110.7(8) . . ?

O3 C8 C9 106.3(6) . . ?

C10 C8 C9 114.1(8) . . ?

C13 C11 O4 109.5(9) . . ?

C13 C11 C12 112.0(10) . . ?

O4 C11 C12 106.5(10) . . ?

 

_diffrn_measured_fraction_theta_max    0.934

_diffrn_reflns_theta_full              25.68

_diffrn_measured_fraction_theta_full   0.934

_refine_diff_density_max    0.894

_refine_diff_density_min   -0.596

_refine_diff_density_rms    0.111


#===END


data_9

 

_audit_creation_method            SHELXL-97

_chemical_name_systematic

;

 ?

;

_chemical_name_common             ?

_chemical_melting_point           ?

_chemical_formula_moiety          ?

_chemical_formula_sum

 'C26 H38 Br4 Cd2 Fe2 O8 P2 Se2'

_chemical_formula_weight          1354.56

 

loop_

 _atom_type_symbol

 _atom_type_description

 _atom_type_scat_dispersion_real

 _atom_type_scat_dispersion_imag

 _atom_type_scat_source

 'C'  'C'   0.0033   0.0016

 'International Tables Vol C Tables 4.2.6.8 and 6.1.1.4'

 'H'  'H'   0.0000   0.0000

 'International Tables Vol C Tables 4.2.6.8 and 6.1.1.4'

 'O'  'O'   0.0106   0.0060

 'International Tables Vol C Tables 4.2.6.8 and 6.1.1.4'

 'P'  'P'   0.1023   0.0942

 'International Tables Vol C Tables 4.2.6.8 and 6.1.1.4'

 'Fe'  'Fe'   0.3463   0.8444

 'International Tables Vol C Tables 4.2.6.8 and 6.1.1.4'

 'Se'  'Se'  -0.0929   2.2259

 'International Tables Vol C Tables 4.2.6.8 and 6.1.1.4'

 'Br'  'Br'  -0.2901   2.4595

 'International Tables Vol C Tables 4.2.6.8 and 6.1.1.4'

 'Cd'  'Cd'  -0.8075   1.2024

 'International Tables Vol C Tables 4.2.6.8 and 6.1.1.4'

 

_symmetry_cell_setting            Monoclinic

_symmetry_space_group_name_H-M    P2(1)/c

 

loop_

 _symmetry_equiv_pos_as_xyz

 'x, y, z'

 '-x, y+1/2, -z+1/2'

 '-x, -y, -z'

 'x, -y-1/2, z-1/2'

 

_cell_length_a                    14.8691(9)

_cell_length_b                    15.1994(9)

_cell_length_c                    19.7322(13)

_cell_angle_alpha                 90.00

_cell_angle_beta                  102.003(2)

_cell_angle_gamma                 90.00

_cell_volume                      4362.0(5)

_cell_formula_units_Z             4

_cell_measurement_temperature     273(2)

_cell_measurement_reflns_used     6683

_cell_measurement_theta_min       2.34

_cell_measurement_theta_max       26.59

 

_exptl_crystal_description        rod

_exptl_crystal_colour             brown

_exptl_crystal_size_max           0.40

_exptl_crystal_size_mid           0.30

_exptl_crystal_size_min           0.30

_exptl_crystal_density_meas       ?

_exptl_crystal_density_diffrn     2.063

_exptl_crystal_density_method     'not measured'

_exptl_crystal_F_000              2576

_exptl_absorpt_coefficient_mu     7.058

_exptl_absorpt_correction_type    multi-scan

_exptl_absorpt_correction_T_min   0.1263

_exptl_absorpt_correction_T_max   0.2260

_exptl_absorpt_process_details    ?

 

_exptl_special_details

;

 ?

;

 

_diffrn_ambient_temperature       273(2)

_diffrn_radiation_wavelength      0.71073

_diffrn_radiation_type            MoK\a

_diffrn_radiation_source          'fine-focus sealed tube'

_diffrn_radiation_monochromator   graphite

_diffrn_measurement_device_type   'CCD area detector'

_diffrn_measurement_method        'phi and omega scans'

_diffrn_detector_area_resol_mean  ?

_diffrn_standards_number          ?

_diffrn_standards_interval_count  ?

_diffrn_standards_interval_time   ?

_diffrn_standards_decay_%         ?

_diffrn_reflns_number             48653

_diffrn_reflns_av_R_equivalents   0.0683

_diffrn_reflns_av_sigmaI/netI     0.0588

_diffrn_reflns_limit_h_min        -19

_diffrn_reflns_limit_h_max        19

_diffrn_reflns_limit_k_min        -20

_diffrn_reflns_limit_k_max        19

_diffrn_reflns_limit_l_min        -26

_diffrn_reflns_limit_l_max        26

_diffrn_reflns_theta_min          1.40

_diffrn_reflns_theta_max          28.38

_reflns_number_total              10861

_reflns_number_gt                 7182

_reflns_threshold_expression      >2sigma(I)

 

_computing_data_collection        'Bruker SMART'

_computing_cell_refinement        'Bruker SMART'

_computing_data_reduction         'Bruker SAINT'

_computing_structure_solution     'SHELXS-97 (Sheldrick, 1990)'

_computing_structure_refinement   'SHELXL-97 (Sheldrick, 1997)'

_computing_molecular_graphics     'Bruker SHELXTL'

_computing_publication_material   'Bruker SHELXTL'

 

_refine_special_details

;

 Refinement of F^2^ against ALL reflections.  The weighted R-factor wR and

 goodness of fit S are based on F^2^, conventional R-factors R are based

 on F, with F set to zero for negative F^2^. The threshold expression of

 F^2^ > 2sigma(F^2^) is used only for calculating R-factors(gt) etc. and is

 not relevant to the choice of reflections for refinement.  R-factors based

 on F^2^ are statistically about twice as large as those based on F, and R-

 factors based on ALL data will be even larger.

;

 

_refine_ls_structure_factor_coef  Fsqd

_refine_ls_matrix_type            full

_refine_ls_weighting_scheme       calc

_refine_ls_weighting_details

 'calc w=1/[\s^2^(Fo^2^)+(0.0637P)^2^+4.3552P] where P=(Fo^2^+2Fc^2^)/3'

_atom_sites_solution_primary      direct

_atom_sites_solution_secondary    difmap

_atom_sites_solution_hydrogens    geom

_refine_ls_hydrogen_treatment     constr

_refine_ls_extinction_method      none

_refine_ls_extinction_coef        ?

_refine_ls_number_reflns          10861

_refine_ls_number_parameters      423

_refine_ls_number_restraints      0

_refine_ls_R_factor_all           0.0943

_refine_ls_R_factor_gt            0.0513

_refine_ls_wR_factor_ref          0.1318

_refine_ls_wR_factor_gt           0.1135

_refine_ls_goodness_of_fit_ref    1.014

_refine_ls_restrained_S_all       1.014

_refine_ls_shift/su_max           0.001

_refine_ls_shift/su_mean          0.000

 

loop_

 _atom_site_label

 _atom_site_type_symbol

 _atom_site_fract_x

 _atom_site_fract_y

 _atom_site_fract_z

 _atom_site_U_iso_or_equiv

 _atom_site_adp_type

 _atom_site_occupancy

 _atom_site_symmetry_multiplicity

 _atom_site_calc_flag

 _atom_site_refinement_flags

 _atom_site_disorder_assembly

 _atom_site_disorder_group

Cd1 Cd 0.13358(3) 0.86030(3) 0.28877(2) 0.05144(13) Uani 1 1 d . . .

Cd2 Cd 0.37779(3) 0.81063(3) 0.36154(2) 0.04994(13) Uani 1 1 d . . .

Se1 Se 0.14212(4) 0.89613(4) 0.16181(3) 0.04824(16) Uani 1 1 d . . .

Se2 Se 0.44086(4) 0.76725(4) 0.25257(3) 0.05001(16) Uani 1 1 d . . .

Br2 Br 0.22181(5) 0.71115(4) 0.33332(3) 0.05436(17) Uani 1 1 d . . .

Fe1 Fe 0.09186(6) 0.70053(5) 0.04875(4) 0.04007(19) Uani 1 1 d . . .

Br3 Br 0.28310(6) 0.95712(5) 0.35342(4) 0.0708(2) Uani 1 1 d . . .

Br4 Br 0.45438(6) 0.76032(6) 0.48139(4) 0.0815(2) Uani 1 1 d . . .

Fe2 Fe 0.58360(7) 0.92213(6) 0.18142(4) 0.0552(2) Uani 1 1 d . . .

Br1 Br 0.00249(6) 0.90026(6) 0.34510(4) 0.0829(3) Uani 1 1 d . . .

P1 P 0.04340(10) 0.79418(9) 0.11833(6) 0.0357(3) Uani 1 1 d . . .

P2 P 0.55613(11) 0.85815(10) 0.27463(8) 0.0445(3) Uani 1 1 d . . .

C7 C -0.0172(5) 0.6533(5) 0.0222(3) 0.0579(16) Uani 1 1 d . . .

C6 C 0.0708(5) 0.7814(4) -0.0173(3) 0.0593(18) Uani 1 1 d . . .

O2 O -0.0867(4) 0.6186(4) 0.0046(3) 0.0901(18) Uani 1 1 d . . .

O1 O 0.0561(5) 0.8334(4) -0.0594(3) 0.0914(19) Uani 1 1 d . . .

O4 O 0.0163(3) 0.7542(3) 0.18669(18) 0.0443(9) Uani 1 1 d . . .

O3 O -0.0466(3) 0.8397(3) 0.07437(19) 0.0460(9) Uani 1 1 d . . .

O8 O 0.5287(3) 0.9162(3) 0.3339(2) 0.0621(13) Uani 1 1 d . . .

O7 O 0.6515(3) 0.8104(4) 0.3064(3) 0.0827(16) Uani 1 1 d . . .

C19 C 0.6242(5) 0.8200(5) 0.1568(4) 0.0656(19) Uani 1 1 d . . .

O5 O 0.6483(4) 0.7545(4) 0.1393(3) 0.101(2) Uani 1 1 d . . .

C1 C 0.1938(5) 0.6568(5) 0.1299(3) 0.066(2) Uani 1 1 d . . .

H1 H 0.1978 0.6689 0.1793 0.080 Uiso 1 1 calc R . .

C2 C 0.2336(5) 0.7072(5) 0.0839(4) 0.071(2) Uani 1 1 d . . .

H2 H 0.2701 0.7608 0.0952 0.086 Uiso 1 1 calc R . .

C4 C 0.1642(5) 0.5905(5) 0.0251(4) 0.067(2) Uani 1 1 d . . .

H4 H 0.1424 0.5481 -0.0121 0.080 Uiso 1 1 calc R . .

C3 C 0.2147(5) 0.6646(6) 0.0200(4) 0.074(2) Uani 1 1 d . . .

H3 H 0.2345 0.6844 -0.0218 0.088 Uiso 1 1 calc R . .

C5 C 0.1513(5) 0.5844(5) 0.0933(4) 0.067(2) Uani 1 1 d . . .

H5 H 0.1193 0.5369 0.1121 0.080 Uiso 1 1 calc R . .

C11 C -0.0401(4) 0.6740(4) 0.1879(3) 0.0538(16) Uani 1 1 d . . .

H11 H -0.0222 0.6305 0.1565 0.065 Uiso 1 1 calc R . .

C8 C -0.0799(5) 0.9292(4) 0.0794(3) 0.0569(16) Uani 1 1 d . . .

H8 H -0.0271 0.9692 0.0885 0.068 Uiso 1 1 calc R . .

C13 C -0.0170(6) 0.6387(6) 0.2589(4) 0.089(3) Uani 1 1 d . . .

H13A H 0.0458 0.6192 0.2689 0.133 Uiso 1 1 calc R . .

H13B H -0.0567 0.5900 0.2628 0.133 Uiso 1 1 calc R . .

H13C H -0.0251 0.6838 0.2911 0.133 Uiso 1 1 calc R . .

C20 C 0.6895(6) 0.9616(6) 0.2280(4) 0.078(2) Uani 1 1 d . . .

C24 C 0.5842(7) 0.9881(6) 0.3723(4) 0.094(3) Uani 1 1 d . . .

H24 H 0.6416 0.9958 0.3561 0.113 Uiso 1 1 calc R . .

O6 O 0.7583(5) 0.9868(5) 0.2581(3) 0.108(2) Uani 1 1 d . . .

C10 C -0.1299(7) 0.9370(6) 0.1373(5) 0.099(3) Uani 1 1 d . . .

H10A H -0.1842 0.9010 0.1276 0.148 Uiso 1 1 calc R . .

H10B H -0.1470 0.9972 0.1420 0.148 Uiso 1 1 calc R . .

H10C H -0.0907 0.9176 0.1797 0.148 Uiso 1 1 calc R . .

C9 C -0.1377(7) 0.9502(7) 0.0095(5) 0.105(3) Uani 1 1 d . . .

H9A H -0.1018 0.9423 -0.0252 0.158 Uiso 1 1 calc R . .

H9B H -0.1584 1.0101 0.0089 0.158 Uiso 1 1 calc R . .

H9C H -0.1899 0.9116 0.0001 0.158 Uiso 1 1 calc R . .

C12 C -0.1389(5) 0.6940(7) 0.1635(5) 0.099(3) Uani 1 1 d . . .

H12A H -0.1579 0.7356 0.1943 0.149 Uiso 1 1 calc R . .

H12B H -0.1740 0.6409 0.1627 0.149 Uiso 1 1 calc R . .

H12C H -0.1487 0.7184 0.1177 0.149 Uiso 1 1 calc R . .

C15 C 0.4612(7) 0.9205(6) 0.1100(4) 0.088(3) Uani 1 1 d . . .

H15 H 0.4229 0.8683 0.0970 0.106 Uiso 1 1 calc R . .

C14 C 0.4536(8) 0.9776(7) 0.1630(5) 0.098(3) Uani 1 1 d . . .

H14 H 0.4090 0.9741 0.1931 0.117 Uiso 1 1 calc R . .

C18 C 0.5194(9) 1.0443(6) 0.1630(5) 0.111(4) Uani 1 1 d . . .

H18 H 0.5297 1.0952 0.1942 0.133 Uiso 1 1 calc R . .

C16 C 0.5272(9) 0.9489(6) 0.0772(4) 0.107(4) Uani 1 1 d . . .

H16 H 0.5447 0.9204 0.0373 0.129 Uiso 1 1 calc R . .

C17 C 0.5657(10) 1.0265(7) 0.1095(5) 0.121(4) Uani 1 1 d . . .

H17 H 0.6142 1.0621 0.0964 0.145 Uiso 1 1 calc R . .

C26 C 0.6032(11) 0.9679(9) 0.4467(5) 0.168(6) Uani 1 1 d . . .

H26A H 0.5475 0.9493 0.4598 0.253 Uiso 1 1 calc R . .

H26B H 0.6265 1.0195 0.4725 0.253 Uiso 1 1 calc R . .

H26C H 0.6481 0.9217 0.4563 0.253 Uiso 1 1 calc R . .

C21 C 0.6660(7) 0.7376(8) 0.3555(5) 0.108(3) Uani 1 1 d . . .

H21 H 0.6070 0.7206 0.3664 0.130 Uiso 1 1 calc R . .

C22 C 0.7029(11) 0.6645(8) 0.3237(7) 0.154(5) Uani 1 1 d . . .

H22A H 0.6616 0.6494 0.2812 0.231 Uiso 1 1 calc R . .

H22B H 0.7101 0.6149 0.3545 0.231 Uiso 1 1 calc R . .

H22C H 0.7616 0.6804 0.3144 0.231 Uiso 1 1 calc R . .

C25 C 0.5255(12) 1.0690(7) 0.3577(6) 0.171(7) Uani 1 1 d . . .

H25A H 0.5108 1.0797 0.3087 0.256 Uiso 1 1 calc R . .

H25B H 0.5584 1.1186 0.3809 0.256 Uiso 1 1 calc R . .

H25C H 0.4699 1.0606 0.3743 0.256 Uiso 1 1 calc R . .

C23 C 0.7293(18) 0.7683(13) 0.4200(9) 0.34(2) Uani 1 1 d . . .

H23A H 0.7917 0.7642 0.4142 0.512 Uiso 1 1 calc R . .

H23B H 0.7215 0.7322 0.4582 0.512 Uiso 1 1 calc R . .

H23C H 0.7154 0.8284 0.4289 0.512 Uiso 1 1 calc R . .

 

loop_

 _atom_site_aniso_label

 _atom_site_aniso_U_11

 _atom_site_aniso_U_22

 _atom_site_aniso_U_33

 _atom_site_aniso_U_23

 _atom_site_aniso_U_13

 _atom_site_aniso_U_12

Cd1 0.0550(3) 0.0585(3) 0.0386(2) -0.00153(19) 0.00445(18) 0.0146(2)

Cd2 0.0488(3) 0.0477(3) 0.0512(2) 0.00232(19) 0.00561(19) 0.0005(2)

Se1 0.0523(4) 0.0490(4) 0.0423(3) -0.0038(2) 0.0075(2) -0.0189(3)

Se2 0.0447(4) 0.0446(4) 0.0598(3) -0.0096(3) 0.0087(3) -0.0146(3)

Br2 0.0462(4) 0.0450(4) 0.0691(4) 0.0045(3) 0.0057(3) -0.0027(3)

Fe1 0.0429(5) 0.0395(5) 0.0372(4) -0.0031(3) 0.0067(3) -0.0013(4)

Br3 0.0761(5) 0.0417(4) 0.0827(5) -0.0141(3) -0.0114(4) 0.0068(3)

Br4 0.0877(6) 0.0861(6) 0.0601(4) 0.0170(4) -0.0090(4) 0.0001(5)

Fe2 0.0710(7) 0.0435(5) 0.0517(5) -0.0079(4) 0.0141(4) -0.0164(5)

Br1 0.0817(6) 0.1123(7) 0.0593(4) 0.0076(4) 0.0254(4) 0.0440(5)

P1 0.0362(8) 0.0371(8) 0.0330(6) -0.0006(5) 0.0054(5) -0.0049(6)

P2 0.0384(8) 0.0424(9) 0.0499(8) -0.0002(6) 0.0024(6) -0.0097(7)

C7 0.061(4) 0.055(4) 0.055(3) -0.013(3) 0.005(3) -0.006(3)

C6 0.088(5) 0.051(4) 0.041(3) -0.002(3) 0.019(3) 0.014(4)

O2 0.068(4) 0.098(4) 0.096(4) -0.026(3) -0.001(3) -0.033(3)

O1 0.148(6) 0.075(4) 0.057(3) 0.021(3) 0.036(3) 0.020(4)

O4 0.046(2) 0.048(2) 0.0407(19) 0.0030(17) 0.0138(16) -0.0095(19)

O3 0.042(2) 0.043(2) 0.048(2) -0.0059(17) -0.0010(17) 0.0023(18)

O8 0.071(3) 0.066(3) 0.051(2) -0.020(2) 0.017(2) -0.032(2)

O7 0.051(3) 0.079(4) 0.102(4) 0.027(3) -0.020(3) -0.013(3)

C19 0.052(4) 0.072(5) 0.070(4) -0.018(4) 0.006(3) -0.007(4)

O5 0.081(4) 0.094(5) 0.122(5) -0.041(4) 0.010(4) 0.019(4)

C1 0.057(4) 0.089(6) 0.049(3) -0.006(4) 0.000(3) 0.029(4)

C2 0.034(4) 0.073(5) 0.105(6) -0.011(4) 0.010(4) -0.005(3)

C4 0.065(5) 0.062(5) 0.070(4) -0.022(4) 0.006(4) 0.022(4)

C3 0.067(5) 0.087(6) 0.076(5) 0.005(4) 0.036(4) 0.020(5)

C5 0.059(5) 0.053(4) 0.090(5) 0.025(4) 0.018(4) 0.018(4)

C11 0.049(4) 0.057(4) 0.056(3) 0.003(3) 0.013(3) -0.019(3)

C8 0.056(4) 0.043(4) 0.066(4) -0.001(3) -0.001(3) 0.005(3)

C13 0.097(7) 0.084(6) 0.079(5) 0.030(4) 0.005(4) -0.039(5)

C20 0.092(6) 0.082(6) 0.070(4) -0.026(4) 0.036(4) -0.043(5)

C24 0.113(7) 0.104(7) 0.074(5) -0.038(5) 0.039(5) -0.078(6)

O6 0.091(4) 0.145(6) 0.096(4) -0.049(4) 0.036(3) -0.072(4)

C10 0.100(7) 0.093(7) 0.117(7) 0.010(5) 0.053(6) 0.042(6)

C9 0.117(8) 0.095(7) 0.088(6) 0.013(5) -0.015(5) 0.036(6)

C12 0.053(5) 0.106(7) 0.136(8) 0.034(6) 0.014(5) -0.027(5)

C15 0.108(7) 0.067(5) 0.072(5) 0.000(4) -0.019(5) 0.009(5)

C14 0.121(8) 0.075(7) 0.089(6) 0.014(5) 0.004(5) 0.042(6)

C18 0.186(12) 0.040(5) 0.097(7) -0.005(4) 0.007(7) 0.016(6)

C16 0.191(12) 0.073(6) 0.055(4) 0.003(4) 0.018(6) -0.016(7)

C17 0.196(13) 0.076(7) 0.090(7) 0.020(5) 0.030(7) -0.030(7)

C26 0.223(16) 0.164(13) 0.089(7) -0.052(8) -0.034(9) -0.038(12)

C21 0.079(7) 0.119(9) 0.112(8) 0.042(7) -0.014(5) 0.020(6)

C22 0.192(15) 0.094(9) 0.161(12) 0.030(8) 0.001(10) 0.030(10)

C25 0.32(2) 0.051(6) 0.113(8) -0.013(6) -0.027(10) -0.043(9)

C23 0.48(4) 0.22(2) 0.203(18) -0.027(15) -0.23(2) 0.16(2)

 

_geom_special_details

;

 All esds (except the esd in the dihedral angle between two l.s. planes)

 are estimated using the full covariance matrix.  The cell esds are taken

 into account individually in the estimation of esds in distances, angles

 and torsion angles; correlations between esds in cell parameters are only

 used when they are defined by crystal symmetry.  An approximate (isotropic)

 treatment of cell esds is used for estimating esds involving l.s. planes.

;

 

loop_

 _geom_bond_atom_site_label_1

 _geom_bond_atom_site_label_2

 _geom_bond_distance

 _geom_bond_site_symmetry_2

 _geom_bond_publ_flag

Cd1 Br1 2.5110(9) . ?

Cd1 Se1 2.5925(7) . ?

Cd1 Br2 2.6745(8) . ?

Cd1 Br3 2.7488(9) . ?

Cd2 Br4 2.5207(8) . ?

Cd2 Se2 2.6033(8) . ?

Cd2 Br3 2.6214(9) . ?

Cd2 Br2 2.7274(8) . ?

Se1 P1 2.1836(15) . ?

Se2 P2 2.1738(16) . ?

Fe1 C7 1.751(7) . ?

Fe1 C6 1.772(7) . ?

Fe1 C1 2.073(6) . ?

Fe1 C2 2.079(7) . ?

Fe1 C5 2.085(7) . ?

Fe1 C4 2.094(6) . ?

Fe1 C3 2.094(7) . ?

Fe1 P1 2.2003(15) . ?

Fe2 C20 1.755(9) . ?

Fe2 C19 1.771(8) . ?

Fe2 C15 2.057(9) . ?

Fe2 C14 2.070(10) . ?

Fe2 C18 2.085(9) . ?

Fe2 C16 2.093(9) . ?

Fe2 C17 2.107(9) . ?

Fe2 P2 2.1927(17) . ?

P1 O3 1.593(4) . ?

P1 O4 1.605(4) . ?

P2 O8 1.585(4) . ?

P2 O7 1.601(5) . ?

C7 O2 1.148(8) . ?

C6 O1 1.134(7) . ?

O4 C11 1.483(7) . ?

O3 C8 1.459(7) . ?

O8 C24 1.480(8) . ?

O7 C21 1.456(11) . ?

C19 O5 1.136(9) . ?

C1 C5 1.393(11) . ?

C1 C2 1.410(11) . ?

C2 C3 1.392(11) . ?

C4 C3 1.369(11) . ?

C4 C5 1.401(10) . ?

C11 C13 1.472(9) . ?

C11 C12 1.478(10) . ?

C8 C10 1.492(10) . ?

C8 C9 1.500(10) . ?

C20 O6 1.137(9) . ?

C24 C26 1.468(13) . ?

C24 C25 1.500(16) . ?

C15 C16 1.353(14) . ?

C15 C14 1.381(12) . ?

C14 C18 1.408(15) . ?

C18 C17 1.401(15) . ?

C16 C17 1.404(13) . ?

C21 C22 1.440(16) . ?

C21 C23 1.490(17) . ?

 

loop_

 _geom_angle_atom_site_label_1

 _geom_angle_atom_site_label_2

 _geom_angle_atom_site_label_3

 _geom_angle

 _geom_angle_site_symmetry_1

 _geom_angle_site_symmetry_3

 _geom_angle_publ_flag

Br1 Cd1 Se1 125.13(3) . . ?

Br1 Cd1 Br2 115.62(3) . . ?

Se1 Cd1 Br2 112.11(3) . . ?

Br1 Cd1 Br3 107.01(3) . . ?

Se1 Cd1 Br3 97.97(3) . . ?

Br2 Cd1 Br3 90.41(2) . . ?

Br4 Cd2 Se2 121.87(3) . . ?

Br4 Cd2 Br3 116.56(3) . . ?

Se2 Cd2 Br3 116.47(3) . . ?

Br4 Cd2 Br2 102.85(3) . . ?

Se2 Cd2 Br2 97.35(2) . . ?

Br3 Cd2 Br2 92.02(3) . . ?

P1 Se1 Cd1 93.82(4) . . ?

P2 Se2 Cd2 94.47(5) . . ?

Cd1 Br2 Cd2 86.29(2) . . ?

C7 Fe1 C6 93.1(3) . . ?

C7 Fe1 C1 125.6(3) . . ?

C6 Fe1 C1 141.3(4) . . ?

C7 Fe1 C2 158.6(3) . . ?

C6 Fe1 C2 102.9(4) . . ?

C1 Fe1 C2 39.7(3) . . ?

C7 Fe1 C5 93.7(3) . . ?

C6 Fe1 C5 153.2(3) . . ?

C1 Fe1 C5 39.2(3) . . ?

C2 Fe1 C5 65.7(3) . . ?

C7 Fe1 C4 95.3(3) . . ?

C6 Fe1 C4 114.3(3) . . ?

C1 Fe1 C4 65.7(3) . . ?

C2 Fe1 C4 65.2(3) . . ?

C5 Fe1 C4 39.2(3) . . ?

C7 Fe1 C3 128.1(3) . . ?

C6 Fe1 C3 90.7(3) . . ?

C1 Fe1 C3 65.6(3) . . ?

C2 Fe1 C3 39.0(3) . . ?

C5 Fe1 C3 64.9(3) . . ?

C4 Fe1 C3 38.2(3) . . ?

C7 Fe1 P1 92.8(2) . . ?

C6 Fe1 P1 88.8(2) . . ?

C1 Fe1 P1 90.40(19) . . ?

C2 Fe1 P1 101.6(2) . . ?

C5 Fe1 P1 116.7(2) . . ?

C4 Fe1 P1 155.0(2) . . ?

C3 Fe1 P1 139.0(3) . . ?

Cd2 Br3 Cd1 86.90(2) . . ?

C20 Fe2 C19 97.1(4) . . ?

C20 Fe2 C15 158.8(4) . . ?

C19 Fe2 C15 96.0(3) . . ?

C20 Fe2 C14 131.0(4) . . ?

C19 Fe2 C14 131.9(4) . . ?

C15 Fe2 C14 39.1(3) . . ?

C20 Fe2 C18 96.6(5) . . ?

C19 Fe2 C18 154.6(4) . . ?

C15 Fe2 C18 65.4(4) . . ?

C14 Fe2 C18 39.6(4) . . ?

C20 Fe2 C16 125.5(4) . . ?

C19 Fe2 C16 89.5(4) . . ?

C15 Fe2 C16 38.0(4) . . ?

C14 Fe2 C16 65.1(4) . . ?

C18 Fe2 C16 65.2(4) . . ?

C20 Fe2 C17 94.0(5) . . ?

C19 Fe2 C17 118.6(4) . . ?

C15 Fe2 C17 65.0(4) . . ?

C14 Fe2 C17 65.9(5) . . ?

C18 Fe2 C17 39.0(4) . . ?

C16 Fe2 C17 39.1(4) . . ?

C20 Fe2 P2 90.9(2) . . ?

C19 Fe2 P2 88.6(3) . . ?

C15 Fe2 P2 106.1(3) . . ?

C14 Fe2 P2 89.9(3) . . ?

C18 Fe2 P2 112.5(3) . . ?

C16 Fe2 P2 143.5(3) . . ?

C17 Fe2 P2 151.5(4) . . ?

O3 P1 O4 107.1(2) . . ?

O3 P1 Se1 108.99(16) . . ?

O4 P1 Se1 101.78(15) . . ?

O3 P1 Fe1 106.74(15) . . ?

O4 P1 Fe1 116.81(16) . . ?

Se1 P1 Fe1 115.07(7) . . ?

O8 P2 O7 107.8(3) . . ?

O8 P2 Se2 100.87(17) . . ?

O7 P2 Se2 112.8(2) . . ?

O8 P2 Fe2 119.60(19) . . ?

O7 P2 Fe2 103.0(2) . . ?

Se2 P2 Fe2 112.99(7) . . ?

O2 C7 Fe1 176.8(7) . . ?

O1 C6 Fe1 179.0(7) . . ?

C11 O4 P1 124.5(3) . . ?

C8 O3 P1 128.8(4) . . ?

C24 O8 P2 126.0(5) . . ?

C21 O7 P2 127.0(6) . . ?

O5 C19 Fe2 177.9(7) . . ?

C5 C1 C2 107.4(6) . . ?

C5 C1 Fe1 70.9(4) . . ?

C2 C1 Fe1 70.4(4) . . ?

C3 C2 C1 107.4(7) . . ?

C3 C2 Fe1 71.1(4) . . ?

C1 C2 Fe1 69.9(4) . . ?

C3 C4 C5 108.2(6) . . ?

C3 C4 Fe1 70.9(4) . . ?

C5 C4 Fe1 70.1(4) . . ?

C4 C3 C2 109.0(7) . . ?

C4 C3 Fe1 70.9(4) . . ?

C2 C3 Fe1 69.9(4) . . ?

C1 C5 C4 108.0(7) . . ?

C1 C5 Fe1 70.0(4) . . ?

C4 C5 Fe1 70.8(4) . . ?

C13 C11 C12 113.8(7) . . ?

C13 C11 O4 107.1(5) . . ?

C12 C11 O4 110.7(6) . . ?

O3 C8 C10 110.9(6) . . ?

O3 C8 C9 105.8(6) . . ?

C10 C8 C9 114.0(7) . . ?

O6 C20 Fe2 179.7(9) . . ?

C26 C24 O8 109.1(7) . . ?

C26 C24 C25 110.3(9) . . ?

O8 C24 C25 105.5(8) . . ?

C16 C15 C14 110.1(9) . . ?

C16 C15 Fe2 72.4(6) . . ?

C14 C15 Fe2 71.0(5) . . ?

C15 C14 C18 106.7(10) . . ?

C15 C14 Fe2 69.9(6) . . ?

C18 C14 Fe2 70.8(6) . . ?

C17 C18 C14 108.0(9) . . ?

C17 C18 Fe2 71.3(6) . . ?

C14 C18 Fe2 69.6(5) . . ?

C15 C16 C17 108.5(9) . . ?

C15 C16 Fe2 69.5(5) . . ?

C17 C16 Fe2 71.0(5) . . ?

C18 C17 C16 106.7(10) . . ?

C18 C17 Fe2 69.6(5) . . ?

C16 C17 Fe2 69.9(5) . . ?

C22 C21 O7 108.3(10) . . ?

C22 C21 C23 112.5(12) . . ?

O7 C21 C23 108.0(12) . . ?

 

_diffrn_measured_fraction_theta_max    0.993

_diffrn_reflns_theta_full              28.38

_diffrn_measured_fraction_theta_full   0.993

_refine_diff_density_max    1.571

_refine_diff_density_min   -1.606

_refine_diff_density_rms    0.136


#===END

  
data_10 
  
_audit_creation_method            SHELXL-97 
_chemical_name_systematic 
; 
 ? 
; 
_chemical_name_common             ? 
_chemical_melting_point           ? 
_chemical_formula_moiety          ? 
_chemical_formula_sum 
 'C13 H19 Cd Fe I2 O4 P Se' 
_chemical_formula_weight          771.26 
  
loop_ 
 _atom_type_symbol 
 _atom_type_description 
 _atom_type_scat_dispersion_real 
 _atom_type_scat_dispersion_imag 
 _atom_type_scat_source 
 'C'  'C'   0.0033   0.0016 
 'International Tables Vol C Tables 4.2.6.8 and 6.1.1.4' 
 'H'  'H'   0.0000   0.0000 
 'International Tables Vol C Tables 4.2.6.8 and 6.1.1.4' 
 'O'  'O'   0.0106   0.0060 
 'International Tables Vol C Tables 4.2.6.8 and 6.1.1.4' 
 'P'  'P'   0.1023   0.0942 
 'International Tables Vol C Tables 4.2.6.8 and 6.1.1.4' 
 'Se'  'Se'  -0.0929   2.2259 
 'International Tables Vol C Tables 4.2.6.8 and 6.1.1.4' 
 'I'  'I'  -0.4742   1.8119 
 'International Tables Vol C Tables 4.2.6.8 and 6.1.1.4' 
 'Fe'  'Fe'   0.3463   0.8444 
 'International Tables Vol C Tables 4.2.6.8 and 6.1.1.4' 
 'Cd'  'Cd'  -0.8075   1.2024 
 'International Tables Vol C Tables 4.2.6.8 and 6.1.1.4' 
  
_symmetry_cell_setting            Orthorhombic 
_symmetry_space_group_name_H-M    Pbcn 
  
loop_ 
 _symmetry_equiv_pos_as_xyz 
 'x, y, z' 
 '-x+1/2, -y+1/2, z+1/2' 
 '-x, y, -z+1/2' 
 'x+1/2, -y+1/2, -z' 
 '-x, -y, -z' 
 'x-1/2, y-1/2, -z-1/2' 
 'x, -y, z-1/2' 
 '-x-1/2, y-1/2, z' 
  
_cell_length_a                    8.1713(3) 
_cell_length_b                    20.2209(7) 
_cell_length_c                    27.2425(9) 
_cell_angle_alpha                 90.00 
_cell_angle_beta                  90.00 
_cell_angle_gamma                 90.00 
_cell_volume                      4501.3(3) 
_cell_formula_units_Z             8 
_cell_measurement_temperature     223(2) 
_cell_measurement_reflns_used     5943 
_cell_measurement_theta_min       2.51 
_cell_measurement_theta_max       22.56 
  
_exptl_crystal_description        plate
_exptl_crystal_colour             colorless 
_exptl_crystal_size_max           0.20 
_exptl_crystal_size_mid           0.10 
_exptl_crystal_size_min           0.05 
_exptl_crystal_density_meas       ? 
_exptl_crystal_density_diffrn     2.276 
_exptl_crystal_density_method     'not measured' 
_exptl_crystal_F_000              2864 
_exptl_absorpt_coefficient_mu     6.032 
_exptl_absorpt_correction_type    multi-scan 
_exptl_absorpt_correction_T_min   0.6143 
_exptl_absorpt_correction_T_max   1.0000 
_exptl_absorpt_process_details    SADABS 
  
_exptl_special_details 
; 
 ? 
; 
  
_diffrn_ambient_temperature       223(2) 
_diffrn_radiation_wavelength      0.71073 
_diffrn_radiation_type            MoK\a 
_diffrn_radiation_source          'fine-focus sealed tube' 
_diffrn_radiation_monochromator   graphite 
_diffrn_measurement_device_type   'CCD area detector' 
_diffrn_measurement_method        'phi and omega scans' 
_diffrn_detector_area_resol_mean  ? 
_diffrn_standards_number          ? 
_diffrn_standards_interval_count  ? 
_diffrn_standards_interval_time   ? 
_diffrn_standards_decay_%         ? 
_diffrn_reflns_number             48981 
_diffrn_reflns_av_R_equivalents   0.0803 
_diffrn_reflns_av_sigmaI/netI     0.0344 
_diffrn_reflns_limit_h_min        -9 
_diffrn_reflns_limit_h_max        9 
_diffrn_reflns_limit_k_min        -23 
_diffrn_reflns_limit_k_max        23 
_diffrn_reflns_limit_l_min        -32 
_diffrn_reflns_limit_l_max        32 
_diffrn_reflns_theta_min          1.49 
_diffrn_reflns_theta_max          24.74 
_reflns_number_total              3863 
_reflns_number_gt                 2874 
_reflns_threshold_expression      >2sigma(I) 
  
_computing_data_collection        'Bruker SMART' 
_computing_cell_refinement        'Bruker SMART' 
_computing_data_reduction         'Bruker SAINT' 
_computing_structure_solution     'SHELXS-97 (Sheldrick, 1990)' 
_computing_structure_refinement   'SHELXL-97 (Sheldrick, 1997)' 
_computing_molecular_graphics     'Bruker SHELXTL' 
_computing_publication_material   'Bruker SHELXTL' 
  
_refine_special_details 
; 
 Refinement of F^2^ against ALL reflections.  The weighted R-factor wR and 
 goodness of fit S are based on F^2^, conventional R-factors R are based 
 on F, with F set to zero for negative F^2^. The threshold expression of 
 F^2^ > 2sigma(F^2^) is used only for calculating R-factors(gt) etc. and is 
 not relevant to the choice of reflections for refinement.  R-factors based 
 on F^2^ are statistically about twice as large as those based on F, and R- 
 factors based on ALL data will be even larger. 
; 
  
_refine_ls_structure_factor_coef  Fsqd 
_refine_ls_matrix_type            full 
_refine_ls_weighting_scheme       calc 
_refine_ls_weighting_details 
 'calc w=1/[\s^2^(Fo^2^)+(0.0389P)^2^+4.6677P] where P=(Fo^2^+2Fc^2^)/3' 
_atom_sites_solution_primary      direct 
_atom_sites_solution_secondary    difmap 
_atom_sites_solution_hydrogens    geom 
_refine_ls_hydrogen_treatment     constr 
_refine_ls_extinction_method      none 
_refine_ls_extinction_coef        ? 
_refine_ls_number_reflns          3863 
_refine_ls_number_parameters      208 
_refine_ls_number_restraints      0 
_refine_ls_R_factor_all           0.0579 
_refine_ls_R_factor_gt            0.0360 
_refine_ls_wR_factor_ref          0.0830 
_refine_ls_wR_factor_gt           0.0756 
_refine_ls_goodness_of_fit_ref    1.060 
_refine_ls_restrained_S_all       1.060 
_refine_ls_shift/su_max           0.001 
_refine_ls_shift/su_mean          0.000 
  
loop_ 
 _atom_site_label 
 _atom_site_type_symbol 
 _atom_site_fract_x 
 _atom_site_fract_y 
 _atom_site_fract_z 
 _atom_site_U_iso_or_equiv 
 _atom_site_adp_type 
 _atom_site_occupancy 
 _atom_site_symmetry_multiplicity 
 _atom_site_calc_flag 
 _atom_site_refinement_flags 
 _atom_site_disorder_assembly 
 _atom_site_disorder_group 
Cd1 Cd 0.48667(6) 0.24593(2) 0.679471(17) 0.04757(15) Uani 1 1 d . . . 
Fe1 Fe 0.77647(11) 0.47839(5) 0.64577(3) 0.0435(2) Uani 1 1 d . . . 
I1 I 0.75312(6) 0.21981(3) 0.743847(16) 0.05411(15) Uani 1 1 d . . . 
I2 I 0.45021(8) 0.16690(3) 0.600526(18) 0.07265(19) Uani 1 1 d . . . 
Se1 Se 0.42414(8) 0.37197(3) 0.67228(2) 0.04509(18) Uani 1 1 d . . . 
P1 P 0.62167(19) 0.39642(8) 0.62131(5) 0.0366(4) Uani 1 1 d . . . 
O1 O 0.4998(8) 0.5677(3) 0.6359(2) 0.092(2) Uani 1 1 d . . . 
O2 O 0.8984(6) 0.4984(3) 0.54655(18) 0.0728(16) Uani 1 1 d . . . 
O3 O 0.5509(5) 0.4177(2) 0.56935(13) 0.0410(10) Uani 1 1 d . . . 
O4 O 0.7081(5) 0.3265(2) 0.61517(14) 0.0428(10) Uani 1 1 d . . . 
C1 C 0.9845(9) 0.4374(5) 0.6782(3) 0.065(2) Uani 1 1 d . . . 
H1A H 1.0584 0.4053 0.6629 0.078 Uiso 1 1 calc R . . 
C2 C 0.8458(9) 0.4221(4) 0.7065(2) 0.0565(19) Uani 1 1 d . . . 
H2A H 0.8067 0.3775 0.7142 0.068 Uiso 1 1 calc R . . 
C3 C 0.7727(10) 0.4813(5) 0.7219(2) 0.068(2) Uani 1 1 d . . . 
H3A H 0.6759 0.4858 0.7428 0.082 Uiso 1 1 calc R . . 
C4 C 0.8730(12) 0.5337(4) 0.7038(3) 0.077(3) Uani 1 1 d . . . 
H4A H 0.8578 0.5811 0.7096 0.092 Uiso 1 1 calc R . . 
C5 C 1.0015(11) 0.5036(5) 0.6770(3) 0.077(3) Uani 1 1 d . . . 
H5A H 1.0896 0.5274 0.6601 0.092 Uiso 1 1 calc R . . 
C6 C 0.6070(10) 0.5335(4) 0.6387(3) 0.060(2) Uani 1 1 d . . . 
C7 C 0.8505(8) 0.4913(3) 0.5850(3) 0.0517(17) Uani 1 1 d . . . 
C8 C 0.4241(9) 0.3839(4) 0.5408(3) 0.066(2) Uani 1 1 d . . . 
H8A H 0.4214 0.3368 0.5493 0.079 Uiso 1 1 calc R . . 
C9 C 0.2622(10) 0.4152(7) 0.5519(3) 0.118(4) Uani 1 1 d . . . 
H9A H 0.2351 0.4080 0.5858 0.177 Uiso 1 1 calc R . . 
H9B H 0.1794 0.3958 0.5314 0.177 Uiso 1 1 calc R . . 
H9C H 0.2684 0.4618 0.5456 0.177 Uiso 1 1 calc R . . 
C10 C 0.4691(10) 0.3923(4) 0.4874(3) 0.076(2) Uani 1 1 d . . . 
H10A H 0.5713 0.3705 0.4810 0.114 Uiso 1 1 calc R . . 
H10B H 0.4793 0.4385 0.4800 0.114 Uiso 1 1 calc R . . 
H10C H 0.3852 0.3732 0.4672 0.114 Uiso 1 1 calc R . . 
C11 C 0.8661(9) 0.3160(4) 0.5890(2) 0.059(2) Uani 1 1 d . . . 
H11A H 0.9292 0.3572 0.5888 0.071 Uiso 1 1 calc R . . 
C12 C 0.9574(10) 0.2640(4) 0.6171(3) 0.074(2) Uani 1 1 d . . . 
H12A H 0.9801 0.2799 0.6496 0.112 Uiso 1 1 calc R . . 
H12B H 1.0585 0.2543 0.6006 0.112 Uiso 1 1 calc R . . 
H12C H 0.8922 0.2246 0.6190 0.112 Uiso 1 1 calc R . . 
C13 C 0.8304(12) 0.2949(5) 0.5371(3) 0.105(4) Uani 1 1 d . . . 
H13A H 0.7732 0.3297 0.5204 0.158 Uiso 1 1 calc R . . 
H13B H 0.7638 0.2558 0.5375 0.158 Uiso 1 1 calc R . . 
H13C H 0.9313 0.2858 0.5204 0.158 Uiso 1 1 calc R . . 
  
loop_ 
 _atom_site_aniso_label 
 _atom_site_aniso_U_11 
 _atom_site_aniso_U_22 
 _atom_site_aniso_U_33 
 _atom_site_aniso_U_23 
 _atom_site_aniso_U_13 
 _atom_site_aniso_U_12 
Cd1 0.0570(3) 0.0485(3) 0.0372(3) 0.0006(2) -0.0068(2) 0.0048(2) 
Fe1 0.0500(6) 0.0499(6) 0.0305(5) 0.0052(4) -0.0077(4) -0.0006(4) 
I1 0.0479(3) 0.0692(3) 0.0453(3) -0.0044(2) -0.0067(2) 0.0125(2) 
I2 0.1082(5) 0.0642(3) 0.0456(3) -0.0106(2) -0.0180(3) 0.0048(3) 
Se1 0.0460(4) 0.0508(4) 0.0385(4) 0.0057(3) 0.0099(3) 0.0098(3) 
P1 0.0373(9) 0.0457(10) 0.0269(8) 0.0017(7) -0.0003(6) 0.0045(7) 
O1 0.110(5) 0.085(5) 0.081(4) 0.004(3) -0.007(3) 0.046(4) 
O2 0.070(4) 0.105(4) 0.043(3) 0.025(3) 0.007(3) -0.007(3) 
O3 0.040(2) 0.054(3) 0.029(2) 0.0032(18) -0.0063(17) -0.003(2) 
O4 0.045(3) 0.044(3) 0.039(2) 0.0012(19) 0.0095(18) 0.007(2) 
C1 0.062(5) 0.086(6) 0.047(4) 0.003(4) -0.021(4) 0.005(4) 
C2 0.061(5) 0.063(5) 0.046(4) 0.018(4) -0.026(4) -0.006(4) 
C3 0.074(5) 0.103(7) 0.028(4) -0.002(4) -0.010(4) 0.002(5) 
C4 0.119(8) 0.058(5) 0.053(5) -0.011(4) -0.046(5) 0.003(5) 
C5 0.083(6) 0.104(8) 0.043(5) 0.019(5) -0.026(4) -0.036(6) 
C6 0.082(6) 0.051(5) 0.046(4) 0.000(3) -0.014(4) 0.000(4) 
C7 0.048(4) 0.056(5) 0.051(5) 0.012(3) -0.010(3) -0.001(3) 
C8 0.068(5) 0.072(5) 0.058(5) 0.016(4) -0.027(4) -0.016(4) 
C9 0.055(5) 0.232(14) 0.066(6) 0.033(7) -0.020(5) -0.001(7) 
C10 0.098(7) 0.085(6) 0.046(5) -0.012(4) -0.020(4) 0.004(5) 
C11 0.059(5) 0.067(5) 0.053(4) 0.004(4) 0.025(3) 0.019(4) 
C12 0.065(5) 0.091(6) 0.067(5) 0.005(4) 0.018(4) 0.032(5) 
C13 0.110(7) 0.149(9) 0.057(6) -0.001(6) 0.035(5) 0.061(7) 
  
_geom_special_details 
; 
 All esds (except the esd in the dihedral angle between two l.s. planes) 
 are estimated using the full covariance matrix.  The cell esds are taken 
 into account individually in the estimation of esds in distances, angles 
 and torsion angles; correlations between esds in cell parameters are only 
 used when they are defined by crystal symmetry.  An approximate (isotropic) 
 treatment of cell esds is used for estimating esds involving l.s. planes. 
; 
  
loop_ 
 _geom_bond_atom_site_label_1 
 _geom_bond_atom_site_label_2 
 _geom_bond_distance 
 _geom_bond_site_symmetry_2 
 _geom_bond_publ_flag 
Cd1 Se1 2.6066(8) . ? 
Cd1 I2 2.6960(7) . ? 
Cd1 I1 2.8452(6) . ? 
Cd1 I1 2.9124(7) 3_656 ? 
Fe1 C7 1.782(7) . ? 
Fe1 C6 1.787(9) . ? 
Fe1 C3 2.074(7) . ? 
Fe1 C1 2.087(7) . ? 
Fe1 C2 2.085(6) . ? 
Fe1 C5 2.089(8) . ? 
Fe1 C4 2.090(7) . ? 
Fe1 P1 2.1889(19) . ? 
I1 Cd1 2.9124(7) 3_656 ? 
Se1 P1 2.1857(16) . ? 
P1 O3 1.589(4) . ? 
P1 O4 1.590(4) . ? 
O1 C6 1.119(9) . ? 
O2 C7 1.127(7) . ? 
O3 C8 1.465(8) . ? 
O4 C11 1.490(7) . ? 
C1 C5 1.345(12) . ? 
C1 C2 1.404(10) . ? 
C2 C3 1.402(10) . ? 
C3 C4 1.427(11) . ? 
C4 C5 1.416(12) . ? 
C8 C9 1.497(11) . ? 
C8 C10 1.511(10) . ? 
C11 C12 1.499(10) . ? 
C11 C13 1.505(11) . ? 
  
loop_ 
 _geom_angle_atom_site_label_1 
 _geom_angle_atom_site_label_2 
 _geom_angle_atom_site_label_3 
 _geom_angle 
 _geom_angle_site_symmetry_1 
 _geom_angle_site_symmetry_3 
 _geom_angle_publ_flag 
Se1 Cd1 I2 119.86(3) . . ? 
Se1 Cd1 I1 112.20(2) . . ? 
I2 Cd1 I1 117.79(2) . . ? 
Se1 Cd1 I1 95.70(2) . 3_656 ? 
I2 Cd1 I1 112.98(2) . 3_656 ? 
I1 Cd1 I1 92.237(19) . 3_656 ? 
C7 Fe1 C6 94.1(3) . . ? 
C7 Fe1 C3 158.3(3) . . ? 
C6 Fe1 C3 94.5(3) . . ? 
C7 Fe1 C1 100.1(3) . . ? 
C6 Fe1 C1 157.5(3) . . ? 
C3 Fe1 C1 66.4(3) . . ? 
C7 Fe1 C2 136.4(3) . . ? 
C6 Fe1 C2 129.5(3) . . ? 
C3 Fe1 C2 39.4(3) . . ? 
C1 Fe1 C2 39.3(3) . . ? 
C7 Fe1 C5 92.5(3) . . ? 
C6 Fe1 C5 125.0(4) . . ? 
C3 Fe1 C5 66.4(3) . . ? 
C1 Fe1 C5 37.6(3) . . ? 
C2 Fe1 C5 64.6(3) . . ? 
C7 Fe1 C4 119.7(4) . . ? 
C6 Fe1 C4 92.3(3) . . ? 
C3 Fe1 C4 40.1(3) . . ? 
C1 Fe1 C4 65.5(3) . . ? 
C2 Fe1 C4 65.8(3) . . ? 
C5 Fe1 C4 39.6(3) . . ? 
C7 Fe1 P1 91.4(2) . . ? 
C6 Fe1 P1 89.5(2) . . ? 
C3 Fe1 P1 108.5(3) . . ? 
C1 Fe1 P1 107.4(3) . . ? 
C2 Fe1 P1 89.2(2) . . ? 
C5 Fe1 P1 144.8(3) . . ? 
C4 Fe1 P1 148.6(3) . . ? 
Cd1 I1 Cd1 83.894(19) . 3_656 ? 
P1 Se1 Cd1 97.13(5) . . ? 
O3 P1 O4 108.0(2) . . ? 
O3 P1 Se1 111.02(16) . . ? 
O4 P1 Se1 101.16(16) . . ? 
O3 P1 Fe1 106.05(17) . . ? 
O4 P1 Fe1 116.68(17) . . ? 
Se1 P1 Fe1 113.87(7) . . ? 
C8 O3 P1 127.1(4) . . ? 
C11 O4 P1 124.2(4) . . ? 
C5 C1 C2 108.4(8) . . ? 
C5 C1 Fe1 71.3(5) . . ? 
C2 C1 Fe1 70.3(4) . . ? 
C1 C2 C3 108.7(7) . . ? 
C1 C2 Fe1 70.4(4) . . ? 
C3 C2 Fe1 69.9(4) . . ? 
C2 C3 C4 106.6(7) . . ? 
C2 C3 Fe1 70.7(4) . . ? 
C4 C3 Fe1 70.6(4) . . ? 
C5 C4 C3 106.6(7) . . ? 
C5 C4 Fe1 70.2(4) . . ? 
C3 C4 Fe1 69.4(4) . . ? 
C1 C5 C4 109.8(8) . . ? 
C1 C5 Fe1 71.1(4) . . ? 
C4 C5 Fe1 70.2(4) . . ? 
O1 C6 Fe1 177.7(7) . . ? 
O2 C7 Fe1 178.8(7) . . ? 
O3 C8 C9 108.7(7) . . ? 
O3 C8 C10 106.6(6) . . ? 
C9 C8 C10 111.2(6) . . ? 
O4 C11 C12 106.7(5) . . ? 
O4 C11 C13 108.8(6) . . ? 
C12 C11 C13 112.2(7) . . ? 
  
_diffrn_measured_fraction_theta_max    1.000 
_diffrn_reflns_theta_full              24.74 
_diffrn_measured_fraction_theta_full   1.000 
_refine_diff_density_max    1.431 
_refine_diff_density_min   -0.525 
_refine_diff_density_rms    0.115 
  
